# Supplementary material for: Electrochemical synthesis of β-difluoromethylamide compounds by N-benzenesulfonylacrylamide with difluorine reagents
Source: Royal Society of Chemistry journal article supplement (doi:10.1039/d4cc02543a), 2024-01-01
Supplement: d4cc02543a1.pdf [file d4cc02543a1.pdf]

# Supporting Information

## **Electrochemical synthesis of $\beta$ -difluoromethylamide compounds by *N*-benzenesulfonylacrylamide with difluorine reagents**

Zhi-Long Lei,<sup>a</sup> Zong-Cang Ding,<sup>b</sup> Shu-Hui Li,<sup>\*a</sup> Fei-Hu Cui,<sup>\*a</sup> Hai-Tao Tang<sup>a</sup> and  
Ying-Ming Pan<sup>\*a</sup>

<sup>a</sup> State Key Laboratory for Chemistry and Molecular Engineering of Medicinal Resources, Key Laboratory for Chemistry and Molecular Engineering of Medicinal Resources (Ministry of Education of China), Collaborative Innovation Center for Guangxi Ethnic Medicine, School of Chemistry and Pharmaceutical Sciences, Guangxi Normal University, Guilin 541004, People's Republic of China.

<sup>b</sup> Nataorganic Material (Suzhou) Co., Ltd.

E-mail: gxnulsh@gxnu.edu.cn; cuifeihuhao@163.com; panyim@mailbox.gxnu.edu.cn.

## Table of Contents

|                                                 |    |
|-------------------------------------------------|----|
| 1. General methods.....                         | 3  |
| 2. Supplementary experiments .....              | 4  |
| 3. Synthesis of Substrates.....                 | 5  |
| 5. Control experiments .....                    | 6  |
| 6. Electrochemical applications .....           | 7  |
| 7. Cyclic voltammetry studies.....              | 8  |
| 8. Characterization data for the products ..... | 9  |
| 9. Copies of the NMR spectra .....              | 19 |
| 10. References .....                            | 48 |

## 1. General methods

Unless otherwise noted, all reagents and solvents were obtained commercially and used without further purification. Column chromatography on silica gel (300-400 mesh) was carried out using technical grade 60-90 °C petroleum ether and analytical grade EtOAc (without further purification).  $^1\text{H}$  and  $^{13}\text{C}$  and  $^{19}\text{F}$  spectra were recorded on a 400 MHz or 600MHz spectrometer. Chemical shifts were reported in ppm.  $^1\text{H}$  and  $^{19}\text{F}$  NMR spectra were referenced to  $\text{CDCl}_3$  (7.26 ppm) or DMSO (2.5 ppm) or MeOD (4.87 ppm), and  $^{13}\text{C}$ -NMR spectra were referenced to  $\text{CDCl}_3$  (77.0 ppm) or DMSO (39.5 ppm) or MeOD (49.0 ppm). Peak multiplicities were designated by the following abbreviations: s, singlet; d, doublet; t, triplet; m, multiplet; brs, broad singlet and  $J$ , coupling constant in Hz. The HRMS spectrum was measured by micromass QTOF<sub>2</sub> Quadrupole/Time of Flight Tandem mass spectrometer with electron spray ionization. Potentiostat was purchased from Shanghai Xinrui Company and the model is DJS-292B. Cyclic voltammograms were recorded on a CHI 660E potentiostat.

## 2. Supplementary experiments

Table S1 Screening of reaction conditions<sup>a</sup>

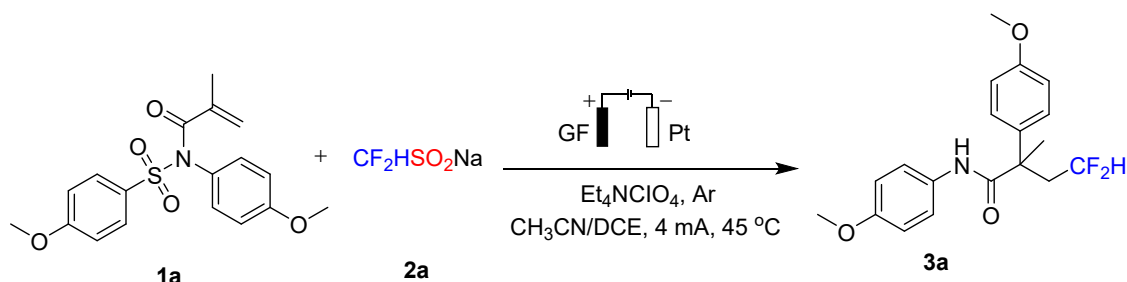

| Entry | Electrode     | Current (mA) | Electrolyte                    | T (°C) | Solvent                           | Yield (%) <sup>[b]</sup> |
|-------|---------------|--------------|--------------------------------|--------|-----------------------------------|--------------------------|
| 1     | GF(+) Pt(-)   | 4            | $\text{Et}_4\text{NClO}_4$     | 45     | $\text{CH}_3\text{CN}/\text{DCE}$ | 80                       |
| 2     | GF(+) Pt(-)   | 4            | $\text{Et}_4\text{NClO}_4$     | 45     | $\text{CH}_3\text{CN}/\text{DCE}$ | 72 <sup>[c]</sup>        |
| 3     | GF(+) Pt(-)   | 4            | $\text{Et}_4\text{NClO}_4$     | 45     | $\text{CH}_3\text{CN}/\text{DCE}$ | 68 <sup>[d]</sup>        |
| 4     | GF(+) Pt(-)   | 4            | $\text{Et}_4\text{NClO}_4$     | rt     | $\text{CH}_3\text{CN}/\text{DCE}$ | 17                       |
| 5     | GF(+) Pt(-)   | 4            | $\text{Et}_4\text{NClO}_4$     | 45     | $\text{CH}_3\text{CN}/\text{DCE}$ | 29                       |
| 6     | GF(+) Pt(-)   | 4            | $\text{Et}_4\text{NClO}_4$     | 60     | $\text{CH}_3\text{CN}/\text{DCE}$ | 72                       |
| 7     | GF(+) Pt(-)   | 4            | $\text{Et}_4\text{NClO}_4$     | 35     | $\text{CH}_3\text{CN}/\text{DCE}$ | 33                       |
| 8     | GF(+) Pt(-)   | 2            | $\text{Et}_4\text{NClO}_4$     | 45     | $\text{CH}_3\text{CN}/\text{DCE}$ | 56 <sup>[e]</sup>        |
| 9     | GF(+) Pt(-)   | 6            | $\text{Et}_4\text{NClO}_4$     | 45     | $\text{CH}_3\text{CN}/\text{DCE}$ | 68 <sup>[f]</sup>        |
| 10    | C(+) Pt(-)    | 4            | $\text{Et}_4\text{NClO}_4$     | 45     | $\text{CH}_3\text{CN}/\text{DCE}$ | 60                       |
| 11    | C(+) Ni(-)    | 4            | $\text{Et}_4\text{NClO}_4$     | 45     | $\text{CH}_3\text{CN}/\text{DCE}$ | 69                       |
| 12    | C(+) C(-)     | 4            | $\text{Et}_4\text{NClO}_4$     | 45     | $\text{CH}_3\text{CN}/\text{DCE}$ | 54                       |
| 13    | RVC(+) RVC(-) | 4            | $\text{Et}_4\text{NClO}_4$     | 45     | $\text{CH}_3\text{CN}/\text{DCE}$ | 57                       |
| 14    | RVC(+) Pt(-)  | 4            | $\text{Et}_4\text{NClO}_4$     | 45     | $\text{CH}_3\text{CN}/\text{DCE}$ | 60                       |
| 15    | Pt(+) Ni(-)   | 4            | $\text{Et}_4\text{NClO}_4$     | 45     | $\text{CH}_3\text{CN}/\text{DCE}$ | 68                       |
| 15    | GF(+) Pt(-)   | 4            | ${}^n\text{Bu}_4\text{NClO}_4$ | 45     | $\text{CH}_3\text{CN}/\text{DCE}$ | 45                       |
| 16    | GF(+) Pt(-)   | 4            | ${}^n\text{Bu}_4\text{NBF}_4$  | 45     | $\text{CH}_3\text{CN}/\text{DCE}$ | 32                       |
| 17    | GF(+) Pt(-)   | 4            | ${}^n\text{Bu}_4\text{NBF}_6$  | 45     | $\text{CH}_3\text{CN}/\text{DCE}$ | 29                       |
| 18    | GF(+) Pt(-)   | 4            | ${}^n\text{Bu}_4\text{NBr}$    | 45     | $\text{CH}_3\text{CN}/\text{DCE}$ | trace                    |
| 19    | GF(+) Pt(-)   | 4            | $\text{LiClO}_4$               | 45     | $\text{CH}_3\text{CN}/\text{DCE}$ | 60                       |
| 20    | GF(+) Pt(-)   | 4            | $\text{Et}_4\text{NClO}_4$     | 45     | $\text{CH}_3\text{CN}/\text{DCE}$ | 51                       |
| 21    | GF(+) Pt(-)   | 4            | $\text{Et}_4\text{NClO}_4$     | 45     | $\text{DCM}/\text{DCE}$           | 0                        |
| 22    | GF(+) Pt(-)   | 4            | $\text{Et}_4\text{NClO}_4$     | 45     | $\text{CH}_3\text{CN}$            | 45                       |
| 23    | GF(+) Pt(-)   | 4            | $\text{Et}_4\text{NClO}_4$     | 45     | $\text{DCE}$                      | 0                        |
| 24    | GF(+) Pt(-)   | 4            | $\text{Et}_4\text{NClO}_4$     | 45     | $\text{CH}_3\text{OH}$            | 0                        |
| 25    | GF(+) Pt(-)   | 4            | $\text{Et}_4\text{NClO}_4$     | 45     | $\text{CH}_3\text{CN}/\text{DCM}$ | 71                       |
| 26    | GF(+) Pt(-)   | 0            | $\text{Et}_4\text{NClO}_4$     | 45     | $\text{CH}_3\text{CN}/\text{DCE}$ | nr                       |
| 26    | GF(+) Pt(-)   | 4            | $\text{Et}_4\text{NClO}_4$     | 45     | $\text{CH}_3\text{CN}/\text{DCE}$ | nr <sup>[g]</sup>        |

<sup>[a]</sup> Reaction conditions: **1a** (0.1 mmol), **2a** (0.3 mmol), Et<sub>4</sub>NClO<sub>4</sub> as electrolyte (0.4 mmol), MeCN and DCE (1:1) as solvent (4 mL), electrolysis at a constant current of 4 mA for 2 h in an undivided cell. <sup>[b]</sup> Isolated yields. <sup>[c]</sup> Et<sub>4</sub>NClO<sub>4</sub> (0.05 M). <sup>[d]</sup> Et<sub>4</sub>NClO<sub>4</sub> (0.125 M). <sup>[e]</sup> 2 mA, 4.5 h. <sup>[f]</sup> 6 mA, 1.5 h. <sup>[g]</sup> 4 mA, Air.

### 3. Synthesis of Substrates

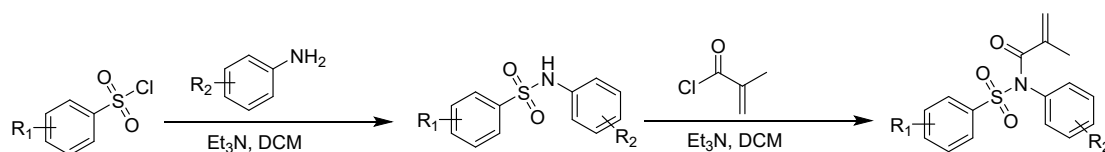

In a dry 100 mL round-bottom flask, a mixture of aniline (10 mmol) and Et<sub>3</sub>N (20 mmol, 2 equiv) in 20 mL of DCM were stirred at room temperature<sup>[1]</sup>. The benzene sulfochloride (11 mmol, 1.1 equiv) was added slowly by a dropping funnel. The reaction was monitored by TLC. After the reaction completed, the reaction mixture was washed with water and extracted with ethyl acetate (10 mL × 3). The combined organic layer was washed with brine, dried over Na<sub>2</sub>SO<sub>4</sub>, and the pure product was obtained by flash column chromatography on silica gel (hexane : ethyl acetate = 20 : 1 to 6 : 1).

Subsequently, in a dry 100 mL round-bottom flask, a mixture of *N*-phenylbenzenesulfonamide (10 mmol) and Et<sub>3</sub>N (30 mmol) in 20 mL of DCM were stirred in ice bath. The methacryloyl chloride (12 mmol, 1.2 equiv) was added slowly by a dropping funnel. The reaction was monitored by TLC. After the reaction completed, the reaction mixture was washed with water and extracted with ethyl acetate (10 mL × 3). The combined organic layer was washed with brine, dried over Na<sub>2</sub>SO<sub>4</sub>, and the pure product was obtained by flash column chromatography on silica gel (hexane : ethyl acetate = 20 : 1 to 4 : 1).

### 4. General procedure for the preparation of products

Electrochemical synthesis of  $\beta$ -difluoromethamide compounds **3a-3v**

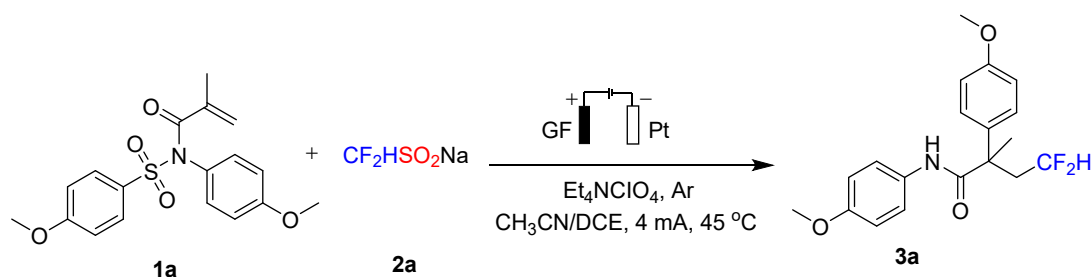

*N*-phenylsulfonyl acrylamide **1a** (0.1 mmol) and sodium difluoromethanesulfonate **2a** (0.3 mmol) as substrates were added to the three-necked flask with Et<sub>4</sub>NClO<sub>4</sub> (0.1 M). A total of 4 mL of solvent was added to the flask with CH<sub>3</sub>CN (2 mL) and DCE (2 mL). The flask, equipped with carbon felt (GF) as anode and platinum sheet (Pt) as cathode, was electrolyzed at a constant current of 4 mA in an argon atmosphere until the substrate was completely consumed. The reaction solution was collected, concentrated under reduced pressure, and purified by gradient elution by silica gel column chromatography (hexane/ethyl acetate = 10:1/4:1 elution) to obtain β-difluoromethamide compounds..

### Electrochemical synthesis of β-difluoromethamide compound **3g-2-D**

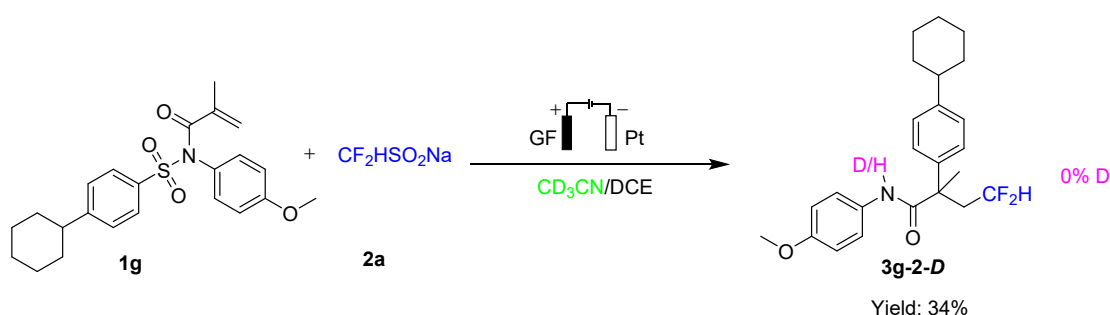

*N*-phenylsulfonyl acrylamide **1g** (0.1 mmol) and sodium difluoromethanesulfonate **2a** (0.3 mmol) as substrates were added to the three-necked flask with Et<sub>4</sub>NClO<sub>4</sub> (0.1 M). A total of 4 mL of solvent was added to the flask with CD<sub>3</sub>CN (2 mL) and DCE (2 mL). The flask, equipped with carbon felt (GF) as anode and platinum sheet (Pt) as cathode, was electrolyzed at a constant current of 4 mA in an argon atmosphere until the substrate was completely consumed. The reaction solution was collected, concentrated under reduced pressure, and purified by gradient elution by silica gel column chromatography (hexane/ethyl acetate = 10:1/4:1 elution) to obtain β-difluoromethamide compound.

## 5. Control experiments

### 5.1 TEMPO and BHT trapped experiment

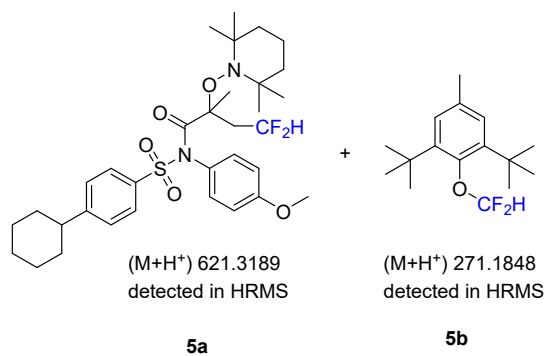

**Fig. S1:** Compound **5a** : HRMS (m/z) [ESI]: calculated for C<sub>33</sub>H<sub>47</sub>F<sub>2</sub>N<sub>2</sub>O<sub>5</sub>S<sup>+</sup> [M+H]<sup>+</sup> : 621.3169, found 621.3189 . Compound **5b** : HRMS (m/z) [ESI]: calculated for C<sub>16</sub>H<sub>25</sub>F<sub>2</sub>O<sup>+</sup> [M+H]<sup>+</sup> : 271.1868, found 271.1848 .

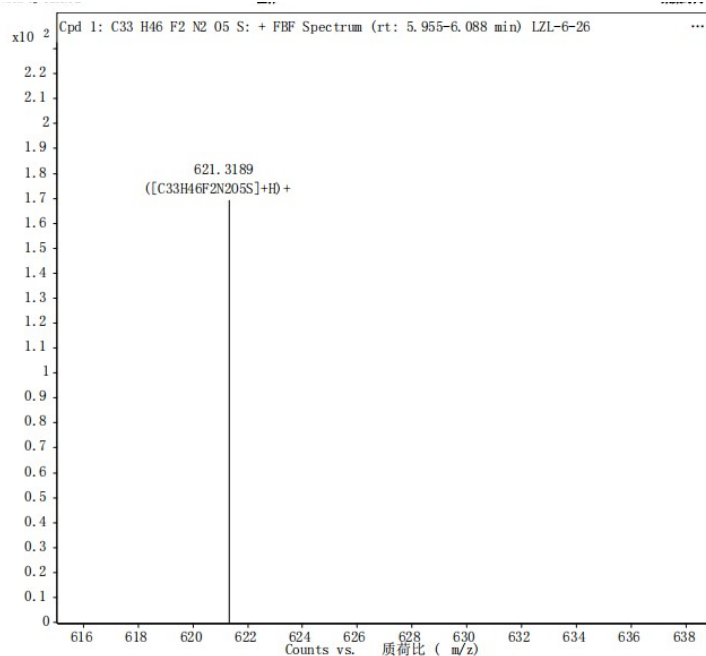

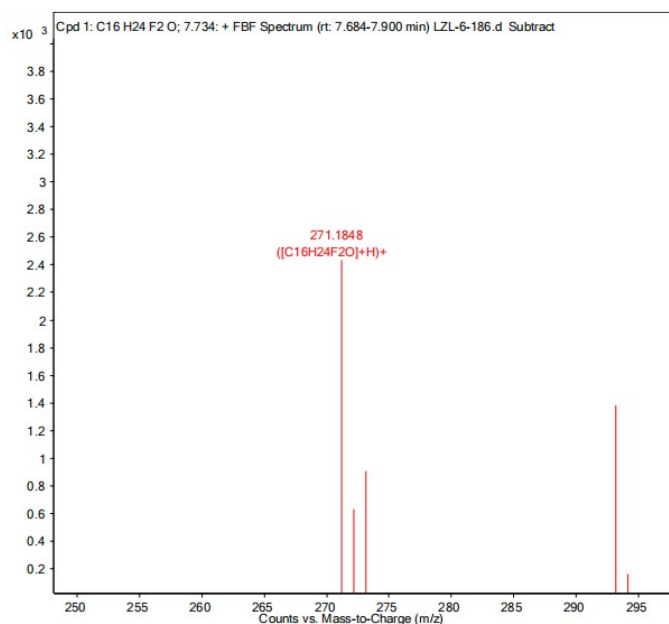

## 6. Electrochemical applications

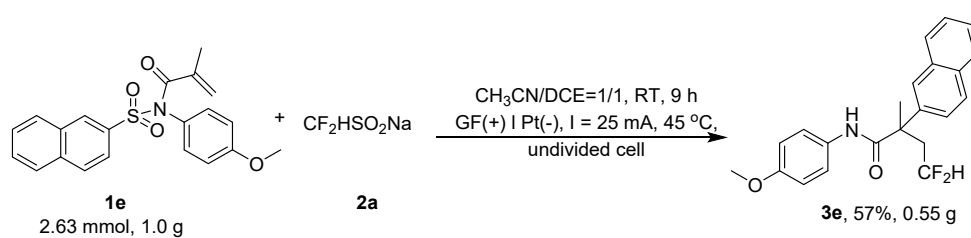

**1e** (2.63 mmol, 1.0eq),  $\text{Et}_4\text{NClO}_4$  (11.08 mmol, 4.0eq) and **2a** (13.85 mmol, 5.0eq) were added successively into a 400 ml round-bottomed flask. The battery was equipped with a carbon felt anode (6 cm x 6 cm) and a platinum plate cathode (6 cm x 6 cm). In an argon atmosphere,  $\text{CH}_3\text{CN}$  (50 mL) and DCE (50 mL) are injected into the reactor. electrolysis was carried out for the corresponding time at a constant current of 25 mA at 45 °C until the substrate was completely consumed. The reaction solution was collected, concentrated under reduced pressure, and purified by gradient elution by silica gel column chromatography (hexane/ethyl acetate = 10:1/4:1 elution) to obtain **2e**.



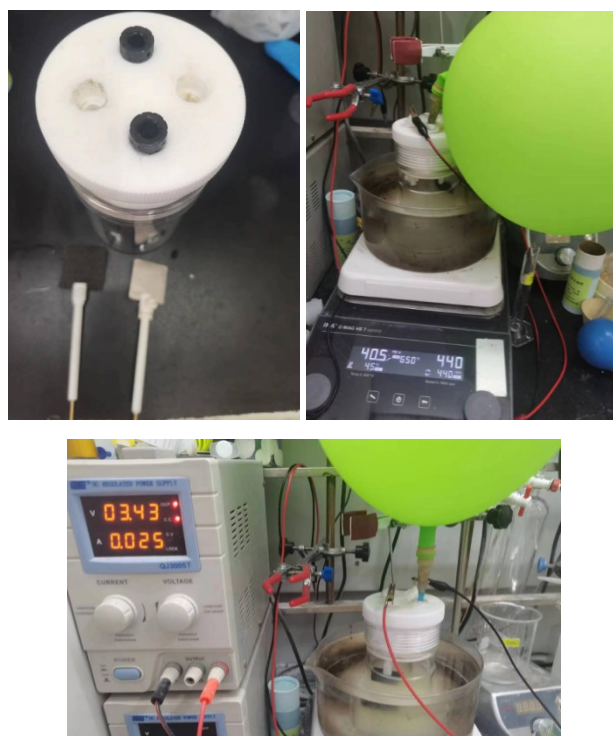

Fig. S2 Electrolysis setup

## 7. Cyclic voltammometry studies

The cyclic voltammograms were recorded in an electrolyte solution of  $\text{LiClO}_4$  (0.1 M) in  $\text{CH}_3\text{CN}/\text{H}_2\text{O}$  using a glassy carbon disk working electrode (diameter, 3 mm), a Pt wire auxiliary electrode and a  $\text{Ag}/\text{AgCl}$  reference electrode. The scan rate was 100 mV/s.

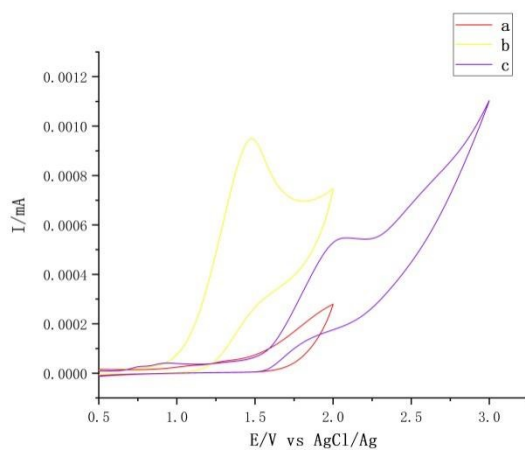

**Fig. S3** Cyclic voltammograms in  $\text{CH}_3\text{CN}/\text{H}_2\text{O} + 0.1 \text{ M LiClO}_4$ . The scanning rate is set to 100 mV/s,  $\text{CH}_3\text{CN}/\text{H}_2\text{O} + 0.1 \text{ M LiClO}_4$  cyclic voltammometry. a) Blank b) **2a** (0.3 mmol) c) **1a** (0.1 mmol). Charting with IUPAC. Init E (V)=0 V, Final E (V)=0 V, High E(V)= 3 V.

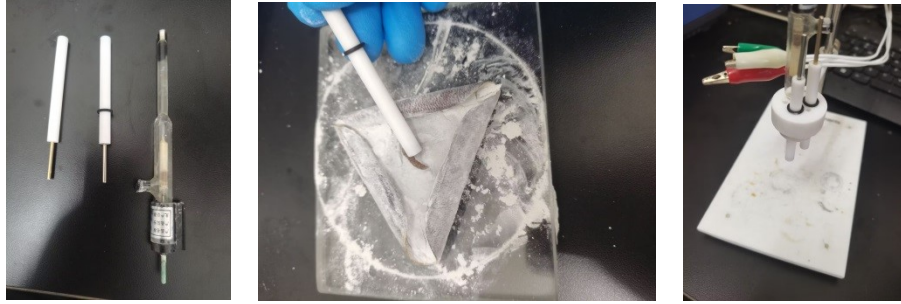

**Fig. S4** Preparation for the CV test. Grinding material: aluminum powder. Grinding

## 8. Characterization data for the products

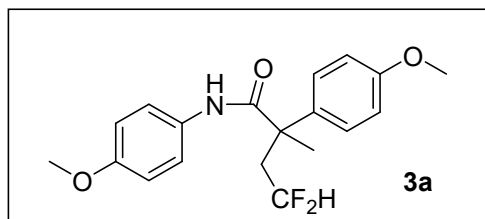

**4,4-difluoro-N,2-bis(4-methoxyphenyl)-2-methylbutanamide (3a).** The title compound (27.2 mg) was isolated by flash chromatography (hexane : ethyl acetate = 20 : 1 to 4 : 1) in 78% yield. colourless liquid. <sup>1</sup>H NMR (400 MHz, CDCl<sub>3</sub>) δ 7.32 (m, 2H), 7.23 (m, 2H), 6.95 (m, 2H), 6.81 (m, 2H), 6.72 (s, 1H), 5.84-5.53 (m, 1H), 3.83 (s, 3H), 3.76 (s, 3H), 2.71-2.65 (m, 1H), 2.49-2.45 (m, 1H), 1.75 (s, 3H). <sup>13</sup>C NMR (101 MHz, CDCl<sub>3</sub>) δ 174.3, 159.2, 156.6, 133.4, 130.6, 128.0, 121.9, 116.7 (t, *J* = 232.3 Hz), 114.6, 114.1, 55.5, 55.3, 48.0, 43.5 (t, *J* = 20.0 Hz), 23.7. <sup>19</sup>F NMR (376 MHz, Chloroform-d) δ -110.85--111.01 (m, *J* = 71.4 Hz), -111.01--111.27 (m *J* = 97.8 Hz), 2F. HRMS(*m/z*)(ESI): calcd for C<sub>19</sub>H<sub>21</sub>F<sub>2</sub>NNaO<sub>3</sub><sup>+</sup> [*M*+Na]<sup>+</sup> 372.1382, found 372.1380.

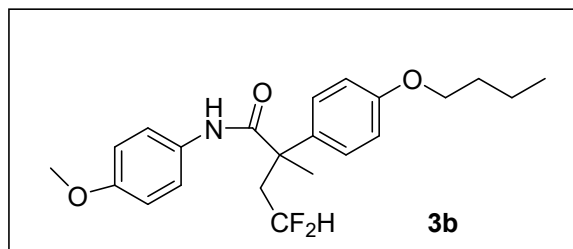

**2-(4-butoxyphenyl)-4,4-difluoro-N-(4-methoxyphenyl)-2-methylbutanamide (3b).** The title compound (30.9 mg) was isolated by flash chromatography (hexane : ethyl acetate = 20 : 1 to 4 : 1) in 79% yield. colourless liquid. <sup>1</sup>H NMR (400 MHz, CDCl<sub>3</sub>) δ 7.30 (m 2H), 7.23 (m, 2H), 6.94 (m, 2H), 6.80 (m, 2H), 6.72 (s, 1H), 5.83-5.52 (m, 1H), 3.98 (t, *J* = 4.0 Hz, 2H), 3.76 (s, 3H), 2.70-2.61 (m, 1H), 2.49-2.44 (m, 1H), 1.80-1.77 (m, 2H), 1.75 (s, 3H), 1.54-1.48 (m, 2H), 0.99 (t, *J* = 8.0 Hz, 3H). <sup>13</sup>C NMR (101 MHz, CDCl<sub>3</sub>) δ 174.4, 158.8, 156.6, 133.1, 130.6, 128.0, 121.8, 116.8 (t, *J* = 242.4 Hz), 115.1, 114.1, 67.8, 55.5, 48.0, 43.5 (t, *J* = 20.2 Hz), 31.3, 23.7, 19.3, 13.9. <sup>19</sup>F NMR (376 MHz, CDCl<sub>3</sub>) δ -111.05 (d, *J* = 3.8 Hz, 2F). HRMS(*m/z*)(ESI): calcd for C<sub>22</sub>H<sub>28</sub>F<sub>2</sub>NO<sub>3</sub><sup>+</sup> [*M*+H]<sup>+</sup> 392.2032, found 392.2028.

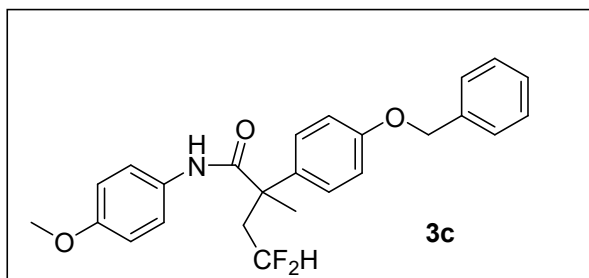

**2-(4-(benzyloxy)phenyl)-4,4-difluoro-N-(4-methoxyphenyl)-2-methylbutanamide**

(**3c**). The title compound (35.7 mg) was isolated by flash chromatography (hexane : ethyl acetate = 20 : 1 to 4 : 1) in 84% yield. colourless liquid.  $^1\text{H NMR}$  (400 MHz,  $\text{CDCl}_3$ )  $\delta$  7.44 (m, 4H), 7.37-7.29 (m, 3H), 7.26-7.21 (m, 2H), 7.03 (m, 2H), 6.81 (m, 2H), 6.73 (s, 1H), 5.85-5.54 (m, 1H), 5.09 (s, 2H), 3.77 (s, 3H), 2.71-2.66 (m, 1H), 2.49-2.45 (m, 1H), 1.76 (s, 3H).  $^{13}\text{C NMR}$  (101 MHz,  $\text{CDCl}_3$ )  $\delta$  174.3, 158.4, 156.6, 136.6, 133.7 130.6, 128.7, 128.2, 128.0, 127.6, 121.9, 116.8 (t,  $J = 242.4$  Hz), 115.5, 114.1, 70.1, 55.5, 48.0, 43.5 (t,  $J = 20.2$  Hz), 23.7.  $^{19}\text{F NMR}$  (376 MHz,  $\text{CDCl}_3$ )  $\delta$  -111.02 (d,  $J = 3.8$  Hz, 2F). HRMS( $m/z$ )(ESI): calcd for  $\text{C}_{25}\text{H}_{26}\text{F}_2\text{NO}_3^+$  [ $\text{M}+\text{H}$ ] $^+$  426.1875, found 426.1874.

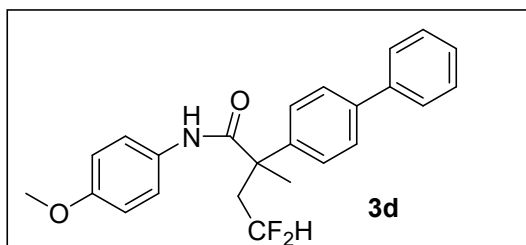

**2-([1,1'-biphenyl]-4-yl)-4,4-difluoro-N-(4-methoxyphenyl)-2-methylbutanamide**

(**3d**). The title compound (35.2 mg) was isolated by flash chromatography (hexane : ethyl acetate = 20 : 1 to 4 : 1) in 89% yield. colourless liquid.  $^1\text{H NMR}$  (400 MHz,  $\text{CDCl}_3$ )  $\delta$  7.65 (m, 2H), 7.60 (m, 2H), 7.46 (m, 4H), 7.37 (m, 1H), 7.25 (m, 2H), 6.81 (m, 2H), 6.77 (s, 1H), 5.92-5.61 (m, 1H), 3.75 (s, 3H), 2.76-2.71 (m, 1H), 2.54-2.0 (m, 1H), 1.82 (s, 3H).  $^{13}\text{C NMR}$  (101 MHz,  $\text{CDCl}_3$ )  $\delta$  173.9, 156.7, 140.9, 140.7, 140.0, 130.5, 129.0, 127.9, 127.8, 127.2, 122.0, 116.7 (t,  $J = 232.3$  Hz), 114.1, 55.5, 43.6 (t,  $J = 20.2$  Hz), 23.6.  $^{19}\text{F NMR}$  (376 MHz,  $\text{CDCl}_3$ )  $\delta$  -110.94 (d,  $J = 3.8$  Hz, 2F). HRMS( $m/z$ )(ESI): calcd for  $\text{C}_{24}\text{H}_{23}\text{F}_2\text{NaNO}_2^+$  [ $\text{M}+\text{Na}$ ] $^+$  418.1589, found 418.1578.

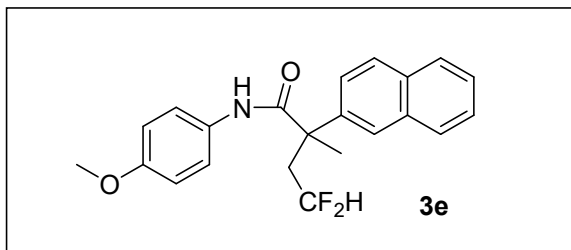

**4,4-difluoro-N-(4-methoxyphenyl)-2-methyl-2-(naphthalen-2-yl)butanamide (3e).**

The title compound (28.0 mg) was isolated by flash chromatography (hexane : ethyl acetate = 20 : 1 to 6 : 1) in 76% yield. colourless liquid.  $^1\text{H NMR}$  (400 MHz,  $\text{CDCl}_3$ )  $\delta$  7.91-7.86 (m, 4H), 7.57-7.55 (m, 2H), 7.45-7.43 (m, 1H), 7.22-7.19 (m, 2H), 6.80-6.78 (m, 2H), 6.71 (s, 1H), 5.86-5.55 (m, 1H), 3.75 (s, 3H), 2.83-2.77 (m, 1H), 2.63-2.58 (m, 1H), 1.90 (s, 3H).  $^{13}\text{C NMR}$  (101 MHz,  $\text{CDCl}_3$ )  $\delta$  173.9, 156.7, 138.9, 133.3, 132.7, 130.5, 129.4, 128.2, 127.7, 126.9, 125.4, 124.9, 122.0, 116.7 (t,  $J = 232.3$  Hz), 114.1, 55.5, 48.8, 43.2 (t,  $J = 20.2$  Hz), 23.5.  $^{19}\text{F NMR}$  (376 MHz,  $\text{CDCl}_3$ )  $\delta$  -110.96 (s, 2F). HRMS( $m/z$ )(ESI): calcd for  $\text{C}_{22}\text{H}_{22}\text{F}_2\text{NO}_2^+$   $[\text{M}+\text{H}]^+$  370.1613, found 370.1614.

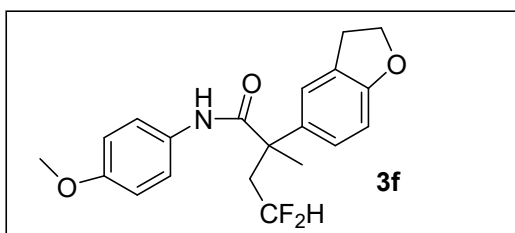

**2-(2,3-dihydrobenzofuran-5-yl)-4,4-difluoro-N-(4-methoxyphenyl)-2-**

**methylbutanamide (3f).** The title compound (29.2 mg) was isolated by flash chromatography (hexane : ethyl acetate = 20 : 1 to 4 : 1) in 81% yield. White solid. m.p. 105.2-107.5 °C.  $^1\text{H NMR}$  (400 MHz,  $\text{CDCl}_3$ )  $\delta$  7.26-7.22 (m, 3H), 7.14-7.12 (m, 1H), 6.82-6.80 (m, 3H), 6.76 (s, 1H), 5.83-5.53 (m, 1H), 4.61 (t,  $J = 8.0$  Hz, 2H), 3.77 (s, 3H), 3.23 (t,  $J = 12.0$  Hz, 2H), 2.69-2.64 (m, 1H), 2.48-2.44 (m, 1H), 1.74 (s, 3H).  $^{13}\text{C NMR}$  (101 MHz,  $\text{CDCl}_3$ )  $\delta$  174.5, 159.9, 156.6, 133.4, 130.6, 128.4, 126.5, 123.5, 121.8, 116.8 (t,  $J = 242.4$  Hz), 114.1, 109.7, 71.6, 55.5, 48.2, 43.7 (t,  $J = 20.2$  Hz), 29.7, 23.8.  $^{19}\text{F NMR}$  (376 MHz,  $\text{CDCl}_3$ )  $\delta$  -111.01 (d,  $J = 7.5$  Hz, 2F). HRMS( $m/z$ )(ESI): calcd for  $\text{C}_{20}\text{H}_{22}\text{F}_2\text{NO}_3^+$   $[\text{M}+\text{H}]^+$  362.1562, found 362.1562.

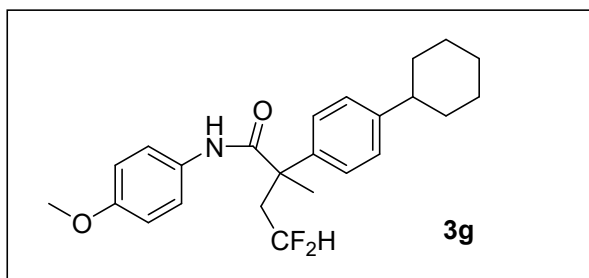

**2-(4-cyclohexylphenyl)-4,4-difluoro-N-(4-methoxyphenyl)-2-methylbutanamide**

(**3g**). The title compound (32.1 mg) was isolated by flash chromatography (hexane : ethyl acetate = 20 : 1 to 4 : 1) in 80% yield. colourless liquid.  $^1\text{H NMR}$  (400 MHz,  $\text{CDCl}_3$ )  $\delta$  7.32-7.29 (m, 2H), 7.26-7.22 (m, 4H), 6.82-6.79 (m, 2H), 6.72 (s, 1H), 5.84-5.54 (m, 1H), 3.76 (s, 3H), 2.71-2.66 (m, 1H), 2.53 -2.44 (m, 2H), 1.89-1.85 (m, 5H), 1.76 (s, 3H), 1.43-1.38 (m, 5H).  $^{13}\text{C NMR}$  (101 MHz,  $\text{CDCl}_3$ )  $\delta$  174.3, 156.6, 148.0, 138.9, 130.6, 127.7, 126.6, 122.0, 116.7 (t,  $J = 232.3$  Hz), 114.1, 55.5, 48.3, 44.1, 43.6 (t,  $J = 20.2$  Hz), 34.3 (d,  $J = 10.1$  Hz), 26.8, 26.1, 23.6.  $^{19}\text{F NMR}$  (376 MHz,  $\text{CDCl}_3$ )  $\delta$  -110.97 (d,  $J = 7.5$  Hz, 2F). HRMS( $m/z$ )(ESI): calcd for  $\text{C}_{24}\text{H}_{30}\text{F}_2\text{NO}_2^+$  [ $\text{M}+\text{H}$ ] $^+$  402.2239, found 402.2238.

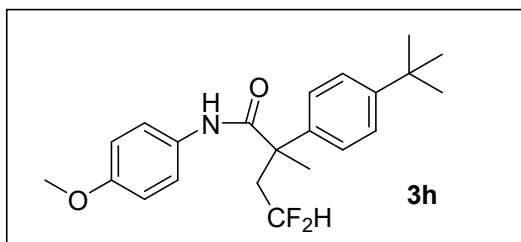

**2-(4-(tert-butyl)phenyl)-4,4-difluoro-N-(4-methoxyphenyl)-2-methylbutanamide**

(**3h**). The title compound (25.5 mg) was isolated by flash chromatography (hexane : ethyl acetate = 20 : 1 to 4 : 1) in 68% yield. colourless liquid.  $^1\text{H NMR}$  (500 MHz,  $\text{CDCl}_3$ )  $\delta$  7.44-7.42 (m, 2H), 7.33-7.31 (m, 2H), 7.25-7.23 (m, 2H), 6.83-6.81 (m, 2H), 6.70 (s, 1H), 5.82-5.59 (m, 1H), 3.77 (s, 3H), 2.71-2.67 (m, 1H), 2.52-2.46 (m, 1H), 1.77 (s, 3H), 1.33 (s, 9H).  $^{13}\text{C NMR}$  (126 MHz,  $\text{CDCl}_3$ )  $\delta$  174.2, 156.6, 151.1, 138.5, 130.6, 126.4, 126.3, 122.0, 116.8 (t,  $J = 237.5$  Hz), 114.1, 55.5, 48.3, 43.6 (t,  $J = 25.0$  Hz), 31.4, 31.3, 23.6.  $^{19}\text{F NMR}$  (376 MHz,  $\text{CDCl}_3$ )  $\delta$  -111.00 (d,  $J = 11.3$  Hz, 2F). HRMS( $m/z$ )(ESI): calcd for  $\text{C}_{22}\text{H}_{28}\text{F}_2\text{NO}_2^+$  [ $\text{M}+\text{H}$ ] $^+$  376.2083, found 376.2083.

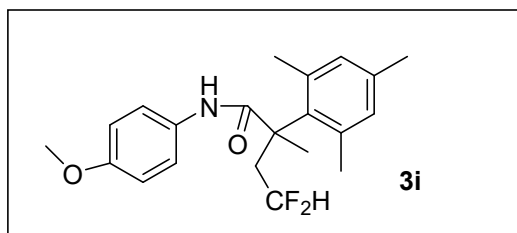

**4,4-difluoro-2-mesityl-N-(4-methoxyphenyl)-2-methylbutanamide (3i).** The title compound (26.0 mg) was isolated by flash chromatography (hexane : ethyl acetate = 20 : 1 to 4 : 1) in 72% yield. colourless liquid.  $^1\text{H NMR}$  (400 MHz,  $\text{CDCl}_3$ )  $\delta$  7.25-7.23 (m, 2H), 6.87 (s, 2H), 6.84-6.82 (m, 3H), 5.92-5.64 (m, 1H), 3.77 (s, 3H), 2.67-2.57 (m, 2H), 2.40 (s, 6H), 2.26 (s, 3H), 1.96 (s, 3H).  $^{13}\text{C NMR}$  (101 MHz,  $\text{CDCl}_3$ )  $\delta$  177.0, 156.6, 138.5, 137.2, 134.2, 132.7, 130.9, 121.9, 117.3 (t,  $J = 232.3$  Hz), 114.2, 55.5, 51.1, 41.7 (t,  $J = 20.2$  Hz), 29.0, 23.6, 20.4.  $^{19}\text{F NMR}$  (376 MHz,  $\text{CDCl}_3$ )  $\delta$  -111.35 (d,  $J = 63.9$  Hz, 2F). HRMS( $m/z$ )(ESI): calcd for  $\text{C}_{21}\text{H}_{25}\text{F}_2\text{NNaO}_2^+$   $[\text{M}+\text{Na}]^+$  384.1746, found 384.1737.

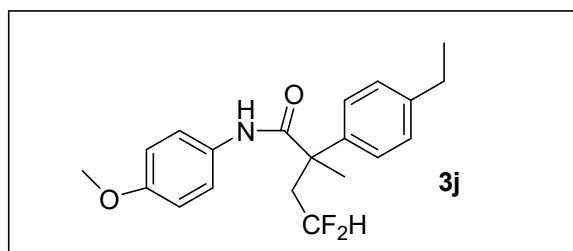

**2-(4-ethylphenyl)-4,4-difluoro-N-(4-methoxyphenyl)-2-methylbutanamide (3j).** The title compound (27.5 mg) was isolated by flash chromatography (hexane : ethyl acetate = 20 : 1 to 4 : 1) in 74% yield. white solid. m.p. 99.2-99.8 °C.  $^1\text{H NMR}$  (500 MHz,  $\text{CDCl}_3$ )  $\delta$  7.32-7.30 (m, 2H), 7.26-7.25 (m, 2H), 7.24-7.23 (m, 2H), 6.82-6.80 (m, 2H), 6.69 (s, 1H), 5.82-5.57 (m, 1H), 3.77 (s, 3H), 2.73-2.64 (m, 3H), 2.54-2.46 (m, 1H), 1.77 (s, 3H), 1.26 (t,  $J = 8.0$  Hz, 3H).  $^{13}\text{C NMR}$  (126 MHz,  $\text{CDCl}_3$ )  $\delta$  174.2, 156.6, 144.2, 138.8, 130.6, 128.8, 126.7, 121.9, 116.8 (t,  $J = 237.5$  Hz), 114.1, 55.5, 43.5 (t,  $J = 12.6$  Hz), 28.4, 23.6, 15.3.  $^{19}\text{F NMR}$  (376 MHz,  $\text{CDCl}_3$ )  $\delta$  -111.02 (d,  $J = 3.8$  Hz, 2F). HRMS( $m/z$ )(ESI): calcd for  $\text{C}_{20}\text{H}_{24}\text{F}_2\text{NO}_2^+$   $[\text{M}+\text{H}]^+$  348.1770, found 348.1763.

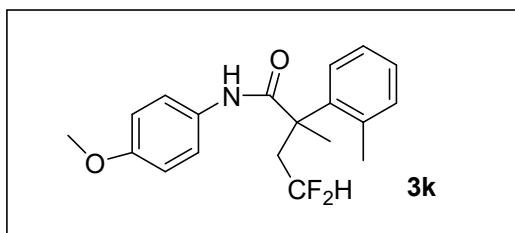

**4,4-difluoro-N-(4-methoxyphenyl)-2-methyl-2-(o-tolyl)butanamide (3k).** The title compound (24.3 mg) was isolated by flash chromatography (hexane : ethyl acetate = 20 : 1 to 4 : 1) in 73% yield. colourless liquid.  $^1\text{H NMR}$  (400 MHz,  $\text{CDCl}_3$ )  $\delta$  7.48-7.46 (m, 1H), 7.31-7.30 (m, 2H), 7.26-7.24 (m, 1H), 7.23-7.20 (m, 2H), 6.82-6.80 (m, 2H), 6.73 (s, 1H), 5.67-5.37 (m, 1H), 3.76 (s, 3H), 2.69-2.64 (m, 2H), 2.31 (s, 3H), 1.82 (s, 3H).  $^{13}\text{C NMR}$  (101 MHz,  $\text{CDCl}_3$ )  $\delta$  175.0, 156.7, 138.5, 137.3, 132.9, 130.5, 128.5, 127.2, 126.8, 122.0, 116.7 (t,  $J = 232.3$  Hz), 114.2, 55.5, 48.3, 43.5 (t,  $J = 20.2$  Hz), 25.9, 20.5.  $^{19}\text{F NMR}$  (376 MHz,  $\text{CDCl}_3$ )  $\delta$  -111.16 (s, 2F). HRMS( $m/z$ )(ESI): calcd for  $\text{C}_{19}\text{H}_{21}\text{F}_2\text{NNaO}_2^+$  [ $\text{M}+\text{Na}$ ] $^+$  356.1433, found 356.1420.

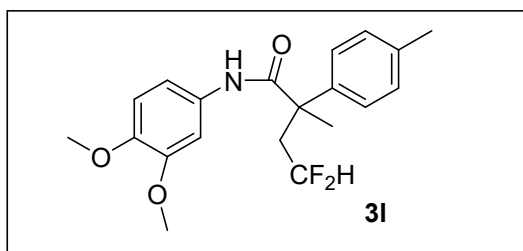

**N-(3,4-dimethoxyphenyl)-4,4-difluoro-2-methyl-2-(p-tolyl)butanamide (3l).** The title compound (31.9 mg) was isolated by flash chromatography (hexane : ethyl acetate = 20 : 1 to 4 : 1) in 88% yield. colourless liquid.  $^1\text{H NMR}$  (400 MHz,  $\text{CDCl}_3$ )  $\delta$  7.30-7.28 (m, 2H), 7.26-7.23 (m, 3H), 6.73-6.72 (m, 2H), 6.64-6.61 (m, 1H), 5.83-5.52 (m, 1H), 3.86 (s, 3H), 3.83 (s, 3H), 2.71-2.66 (m, 1H), 2.52-2.38 (m, 1H), 2.38 (s, 3H), 1.77 (s, 3H).  $^{13}\text{C NMR}$  (101 MHz,  $\text{CDCl}_3$ )  $\delta$  174.2, 149.0, 146.0, 138.4, 138.0, 131.2, 130.1, 126.6, 116.7 (t,  $J = 232.3$  Hz), 111.8, 111.1, 104.8, 56.1, 55.9, 48.4, 43.5 (t,  $J = 20.2$  Hz), 23.6, 21.0.  $^{19}\text{F NMR}$  (376 MHz,  $\text{CDCl}_3$ )  $\delta$  -111.07 (d,  $J = 3.8$  Hz, 2F). HRMS( $m/z$ )(ESI): calcd for  $\text{C}_{20}\text{H}_{24}\text{F}_2\text{NO}_3^+$  [ $\text{M}+\text{H}$ ] $^+$  364.1719, found 364.1717.



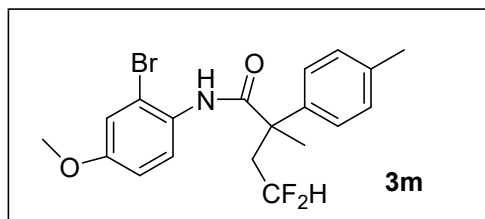

***N*-(2-bromo-4-methoxyphenyl)-4,4-difluoro-2-methyl-2-(*p*-tolyl)butanamide (3m).**

The title compound (22.2 mg) was isolated by flash chromatography (hexane : ethyl acetate = 20 : 1 to 4 : 1) in 54% yield. colourless liquid.  $^1\text{H NMR}$  (400 MHz,  $\text{CDCl}_3$ )  $\delta$  7.50-7.49 (m, 1H), 7.32-7.30 (m, 1H), 7.30-7.25 (m, 4H), 6.81-6.79 (m, 1H), 6.66 (s, 1H), 5.82-5.52 (m, 1H), 3.85 (s, 3H), 2.70-2.65 (m, 1H), 2.54-2.38 (m, 1H), 2.38 (s, 3H), 1.76 (s, 3H).  $^{13}\text{C NMR}$  (101 MHz,  $\text{CDCl}_3$ )  $\delta$  174.3, 153.0, 138.2, 138.1, 131.3, 130.1, 126.6, 125.5, 120.6, 119.0, 116.6 (t,  $J = 242.4$  Hz), 111.9, 111.5, 56.5, 48.4, 43.4 (t,  $J = 20.2$  Hz), 23.5, 21.0.  $^{19}\text{F NMR}$  (376 MHz,  $\text{CDCl}_3$ )  $\delta$  -111.10 (d,  $J = 2.2$  Hz, 2F). HRMS( $m/z$ )(ESI): calcd for  $\text{C}_{19}\text{H}_{21}\text{BrF}_2\text{NO}_2^+$  [ $\text{M}+\text{H}$ ] $^+$  412.0718, found 412.0708.

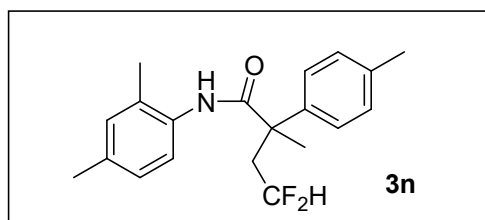

***N*-(2,4-dimethylphenyl)-4,4-difluoro-2-methyl-2-(*p*-tolyl)butanamide (3n).**

The title compound (19.9 mg) was isolated by flash chromatography (hexane : ethyl acetate = 20 : 1 to 4 : 1) in 60% yield. colourless liquid.  $^1\text{H NMR}$  (400 MHz,  $\text{CDCl}_3$ )  $\delta$  7.55 (m, 1H), 7.33 (m, 2H), 7.25 (m, 2H), 6.98 (m, 1H), 6.90 (s, 1H), 6.61 (s, 1H), 5.86-5.56 (m, 1H), 2.38 (s, 3H), 2.25 (s, 3H), 1.83 (s, 3H), 1.79 (s, 3H).  $^{13}\text{C NMR}$  (101 MHz,  $\text{CDCl}_3$ )  $\delta$  174.4, 138.6, 138.0, 134.9, 132.8, 131.1, 130.0, 129.1, 127.3, 126.7, 122.7, 116.8 (t,  $J = 242.4$  Hz), 48.4, 43.2 (t,  $J = 20.2$  Hz), 23.6, 21.0, 20.8, 17.1.  $^{19}\text{F NMR}$  (376 MHz,  $\text{CDCl}_3$ )  $\delta$  -110.94 (s, 2F). HRMS( $m/z$ )(ESI): calcd for  $\text{C}_{20}\text{H}_{24}\text{F}_2\text{NO}_2^+$  [ $\text{M}+\text{H}$ ] $^+$  332.1821, found 332.1825.

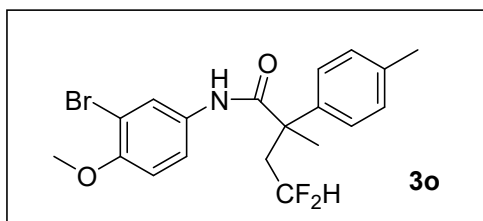

***N*-(3-bromo-4-methoxyphenyl)-4,4-difluoro-2-methyl-2-(*p*-tolyl)butanamide (3o).**

The title compound (31.2 mg) was isolated by flash chromatography (hexane : ethyl acetate = 20 : 1 to 4 : 1) in 76% yield. colourless liquid.  $^1\text{H NMR}$  (400 MHz,  $\text{CDCl}_3$ )  $\delta$  7.53 (m, 1H), 7.36-7.34 (m, 1H), 7.32-7.27 (m, 4H), 6.85-6.83 (m, 1H), 6.70 (s, 1H), 5.82-5.58 (m, 1H), 3.89 (s, 3H), 2.73-2.69 (m, 1H), 2.54-2.42 (m, 1H), 2.42 (s, 3H), 1.79 (s, 3H).  $^{13}\text{C NMR}$  (126 MHz,  $\text{CDCl}_3$ )  $\delta$  174.4, 153.0, 138.2, 131.3, 130.2, 126.6, 125.5, 120.6, 116.7 (t,  $J = 239.4$  Hz), 111.8, 111.4, 56.5, 48.4, 43.4 (t,  $J = 25.2$  Hz), 23.5, 21.1.  $^{19}\text{F NMR}$  (376 MHz,  $\text{CDCl}_3$ )  $\delta$  -111.11 (d,  $J = 3.8$  Hz, 2F). HRMS( $m/z$ )(ESI): calcd for  $\text{C}_{19}\text{H}_{20}\text{BrF}_2\text{NaNO}_3^+$   $[\text{M}+\text{Na}]^+$  450.0487, found 450.0480.

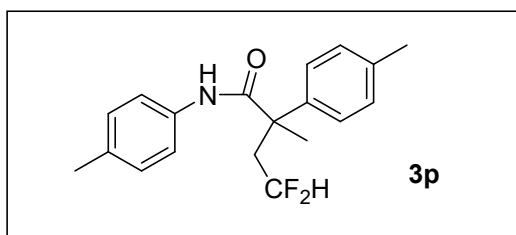

**4,4-difluoro-2-methyl-*N*,2-di-*p*-tolylbutanamide (3p).** The title compound (25.4 mg) was isolated by flash chromatography (hexane : ethyl acetate = 20 : 1 to 4 : 1) in 80% yield. white solid. m.p. 92.2-93.0 °C.  $^1\text{H NMR}$  (400 MHz,  $\text{CDCl}_3$ )  $\delta$  7.29-7.26 (m, 2H), 7.24-7.20 (m, 4H), 7.08-7.06 (m, 2H), 6.72 (s, 1H), 5.83- 5.53(m, 1H), 2.75-2.62 (m, 1H), 2.54-2.41 (m, 1H), 2.37 (s, 3H), 2.28 (s, 3H), 1.76 (s, 3H).  $^{13}\text{C NMR}$  (101 MHz,  $\text{CDCl}_3$ )  $\delta$  174.2, 138.5, 137.9, 135.0, 134.2, 130.0, 129.4, 126.6, 120.0, 116.7 (t,  $J = 232.3$  Hz), 48.4, 43.5 (t,  $J = 20.2$  Hz), 23.5, 21.0, 20.8.  $^{19}\text{F NMR}$  (376 MHz,  $\text{CDCl}_3$ )  $\delta$  -111.03 (d,  $J = 3.8$  Hz, 2F). HRMS( $m/z$ )(ESI): calcd for  $\text{C}_{19}\text{H}_{22}\text{F}_2\text{NO}^+$   $[\text{M}+\text{H}]^+$  318.1664, found 318.1660.

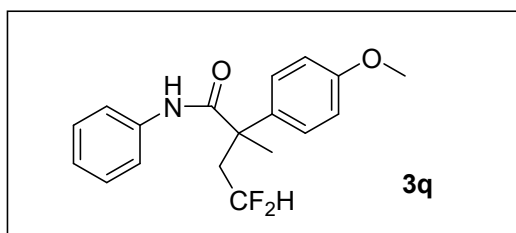

**4,4-difluoro-2-(4-methoxyphenyl)-2-methyl-N-phenylbutanamide (3q).** The title compound (21.7 mg) was isolated by flash chromatography (hexane : ethyl acetate = 20 : 1 to 4 : 1) in 68% yield. colourless liquid.  $^1\text{H NMR}$  (400 MHz,  $\text{CDCl}_3$ )  $\delta$  7.35-7.31 (m, 4H), 7.29-7.26 (m, 2H), 7.10-7.06 (m, 1H), 6.97-6.95 (m, 2H), 6.78 (s, 1H), 5.83-5.52 (m, 1H), 3.84 (s, 3H), 2.71-2.64 (m, 1H), 2.55-2.46 (m, 1H), 1.77 (s, 3H).  $^{13}\text{C NMR}$  (101 MHz,  $\text{CDCl}_3$ )  $\delta$  174.4, 159.2, 137.5, 133.1, 129.0, 128.0, 124.5, 119.8, 116.7 (t,  $J = 242.4$  Hz), 114.7, 55.4, 48.2, 43.5 (t,  $J = 20.2$  Hz), 23.7.  $^{19}\text{F NMR}$  (376 MHz,  $\text{CDCl}_3$ )  $\delta$  -111.11 (d,  $J = 3.1$  Hz, 2F). HRMS( $m/z$ )(ESI): calcd for  $\text{C}_{18}\text{H}_{19}\text{F}_2\text{NaNO}_2^+$  [ $\text{M}+\text{H}$ ] $^+$  342.1276, found 342.1266.

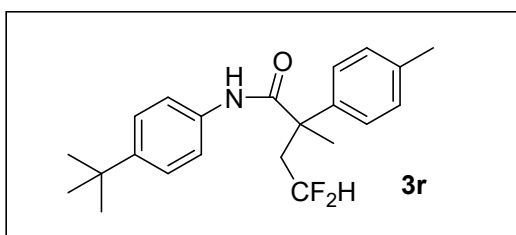

**N-(4-(tert-butyl)phenyl)-4,4-difluoro-2-methyl-2-(p-tolyl)butanamide (3r).** The title compound (27.3 mg) was isolated by flash chromatography (hexane : ethyl acetate = 20 : 1 to 4 : 1) in 76% yield. Yellow liquid.  $^1\text{H NMR}$  (400 MHz,  $\text{CDCl}_3$ )  $\delta$  7.28-7.22 (m, 8H), 6.73 (s, 1H), 5.82-5.52 (m, 1H), 2.70-2.61(m, 1H), 2.54-2.44 (m, 1H), 2.36 (s, 3H), 1.75 (s, 3H), 1.26 (s, 9H).  $^{13}\text{C NMR}$  (101 MHz,  $\text{CDCl}_3$ )  $\delta$  174.2, 147.6, 138.5, 137.9, 134.9, 130.0, 126.6, 125.8, 119.6, 116.7 (t,  $J = 242.4$  Hz), 48.4, 43.5 (t,  $J = 20.2$  Hz), 34.4, 31.3, 23.5, 21.0.  $^{19}\text{F NMR}$  (376 MHz,  $\text{CDCl}_3$ )  $\delta$  -111.04 (d,  $J = 3.2$  Hz, 2F). HRMS( $m/z$ )(ESI): calcd for  $\text{C}_{22}\text{H}_{28}\text{F}_2\text{NO}_2^+$  [ $\text{M}+\text{H}$ ] $^+$  360.2133, found 360.2140.

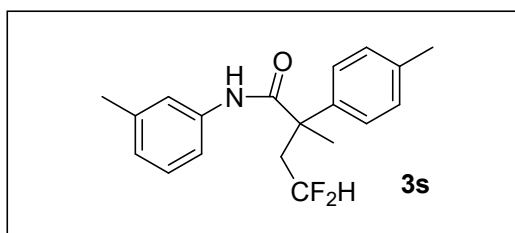

**4,4-difluoro-2-methyl-N-(m-tolyl)-2-(p-tolyl)butanamide (3s).** The title compound (22.8 mg) was isolated by flash chromatography (hexane : ethyl acetate = 20 : 1 to 4 : 1) in 72% yield. colourless liquid.  $^1\text{H NMR}$  (400 MHz,  $\text{CDCl}_3$ )  $\delta$  7.29-7.20 (m, 5H), 7.17-7.08 (m, 2H), 6.90-6.89 (m, 1H), 6.74 (s, 1H), 5.84-5.53 (m, 1H), 2.71-2.65 (m, 1H), 2.51-2.45 (m, 1H), 2.37 (s, 3H), 2.29 (s, 3H), 1.76 (s, 3H).  $^{13}\text{C NMR}$  (101 MHz,  $\text{CDCl}_3$ )  $\delta$  174.3, 139.0, 138.4, 138.0, 137.5, 130.1, 128.8, 126.6, 125.3, 120.5, 116.9, 116.6 (t,  $J = 232.3$  Hz), 48.5, 43.5 (t,  $J = 20.2$  Hz), 23.5, 21.4, 21.0.  $^{19}\text{F NMR}$  (376 MHz,  $\text{CDCl}_3$ )  $\delta$  -111.03 (d,  $J = 2.3$  Hz, 2F). HRMS( $m/z$ )(ESI): calcd for  $\text{C}_{19}\text{H}_{21}\text{F}_2\text{NONa}^+$   $[\text{M}+\text{Na}]^+$  340.1489, found 340.1489.

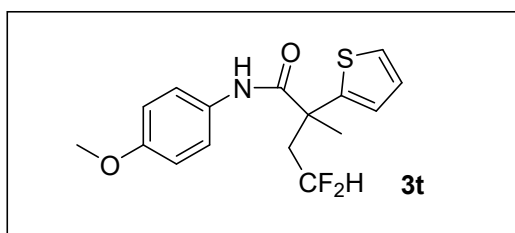

**4,4-difluoro-N-(4-methoxyphenyl)-2-methyl-2-(thiophen-2-yl)butanamide(3t).**

The title compound (23.1 mg) was isolated by flash chromatography (hexane : ethyl acetate = 20 : 1 to 4 : 1) in 71% yield. colourless liquid.  $^1\text{H NMR}$  (400 MHz,  $\text{CDCl}_3$ )  $\delta$  7.38-7.37 (m, 1H), 7.26-7.24 (m, 2H), 7.12-7.08 (m, 2H), 7.06 (s, 1H), 6.83-6.81 (m, 2H), 6.00-5.70 (m, 1H), 3.77 (s, 3H), 2.85-2.74 (m, 1H), 2.60-2.50 (m, 1H), 1.84 (s, 3H).  $^{13}\text{C NMR}$  (101 MHz,  $\text{CDCl}_3$ )  $\delta$  172.4, 156.8, 146.4, 130.3, 127.6, 126.2, 125.9, 122.0, 116.3 (t,  $J = 242.2$  Hz), 114.1, 55.5, 47.0, 44.1 (t,  $J = 20.2$  Hz), 25.1.  $^{19}\text{F NMR}$  (376 MHz,  $\text{CDCl}_3$ )  $\delta$  -111.07. (d,  $J = 2.3$  Hz, 2F). HRMS( $m/z$ )(ESI): calcd for  $\text{C}_{16}\text{H}_{18}\text{F}_2\text{NOS}^+$   $[\text{M}+\text{H}]^+$  326.1021, found 326.1029.

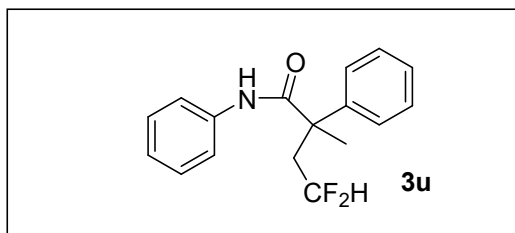

**4,4-difluoro-2-methyl-N,2-diphenylbutanamide (3u).** The title compound (12.4 mg) was isolated by flash chromatography (hexane : ethyl acetate = 20 : 1 to 4 : 1) in 43% yield. Yellow liquid.  $^1\text{H NMR}$  (400 MHz,  $\text{CDCl}_3$ )  $\delta$  7.47-7.42 (m, 5H), 7.35-7.27 (m, 5H), 6.74 (s, 1H), 5.86-5.56 (m, 1H), 2.80-2.65 (m, 1H), 2.54-2.44 (m, 1H), 1.80 (s, 3H).  $^{13}\text{C NMR}$  (101 MHz,  $\text{CDCl}_3$ )  $\delta$  174.0, 141.5, 137.5, 129.4, 129.0, 128.2, 126.7, 124.6, 119.9, 116.6 (t,  $J = 232.3$  Hz), 48.8, 43.5 (t,  $J = 20.2$  Hz), 23.4.  $^{19}\text{F NMR}$  (376 MHz,  $\text{CDCl}_3$ )  $\delta$  -111.08 (s). (d,  $J = 2.3$  Hz, 2F). HRMS( $m/z$ )(ESI): calcd for  $\text{C}_{17}\text{H}_{18}\text{F}_2\text{NO}^+$  [ $\text{M}+\text{H}$ ] $^+$  290.1351, found 290.1350.

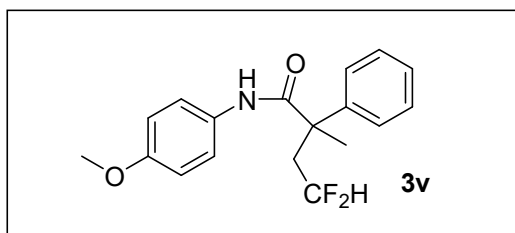

**4,4-difluoro-N-(4-methoxyphenyl)-2-methyl-2-phenylbutanamide (3v).** The title compound (15.0 mg) was isolated by flash chromatography (hexane : ethyl acetate = 20 : 1 to 4 : 1) in 47% yield. Colorless liquid.  $^1\text{H NMR}$  (400 MHz,  $\text{CDCl}_3$ )  $\delta$  7.46-7.36 (m, 5H), 7.24-7.22 (m, 2H), 6.82-6.80 (m, 2H), 6.70 (s, 1H), 5.86-5.56 (m, 1H), 3.76 (s, 3H), 2.73-2.68 (m, 1H), 2.52- 2.47 (m, 1H), 1.79 (s, 3H).  $^{13}\text{C NMR}$  (101 MHz,  $\text{CDCl}_3$ )  $\delta$  174.0, 156.7, 141.7, 130.5, 129.4, 128.1, 126.7, 122.0, 116.7 (t,  $J = 242.4$  Hz), 114.1, 55.5, 48.6, 43.5 (t,  $J = 20.2$  Hz), 23.5.  $^{19}\text{F NMR}$  (376 MHz,  $\text{CDCl}_3$ )  $\delta$  -111.02 (d,  $J = 2.4$  Hz, 2F). HRMS( $m/z$ )(ESI): calcd for  $\text{C}_{18}\text{H}_{20}\text{F}_2\text{NO}^+$  [ $\text{M}+\text{H}$ ] $^+$  320.1457, found 320.1460.

## 9. Copies of the NMR spectra

### 4,4-difluoro-*N*,2-bis(4-methoxyphenyl)-2-methylbutanamide (3a).

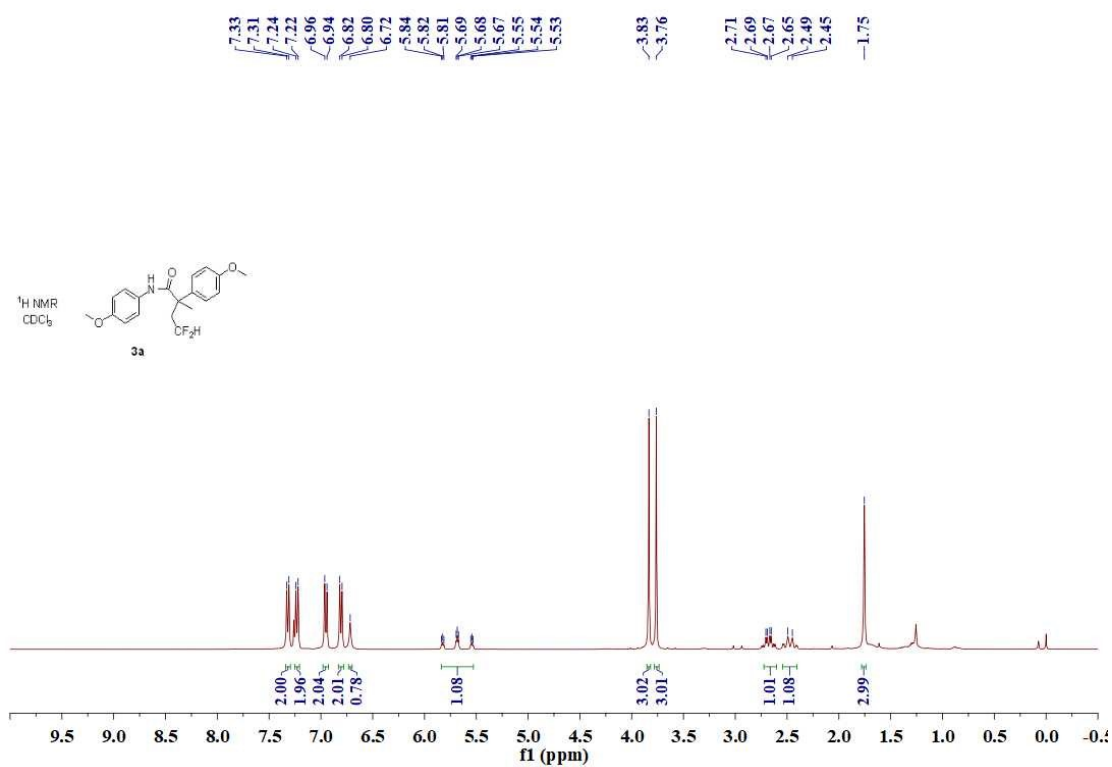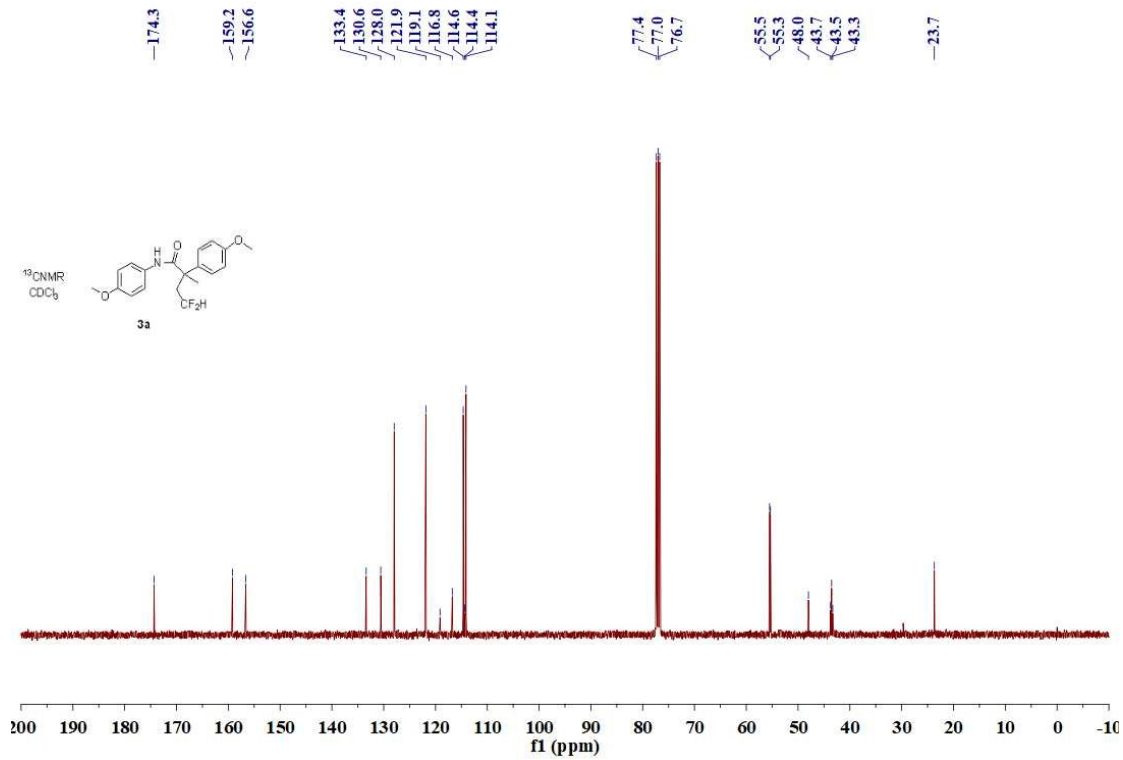

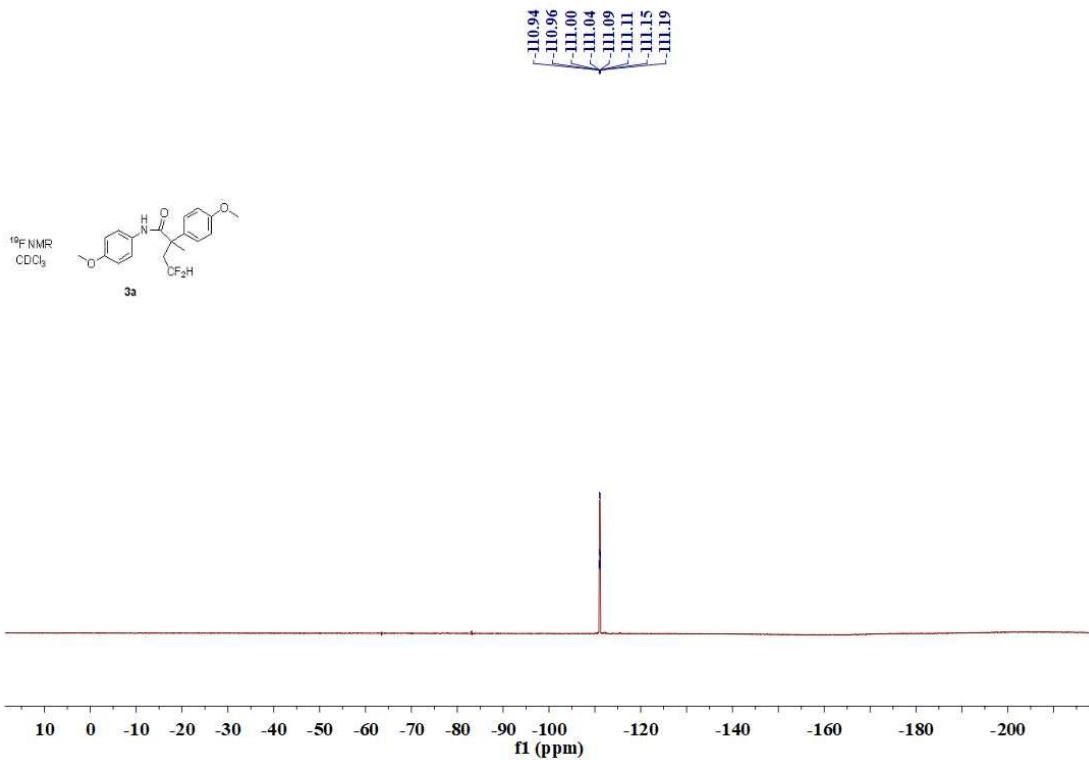

**2-(4-butoxyphenyl)-4,4-difluoro-N-(4-methoxyphenyl)-2-methylbutanamide (3b).**

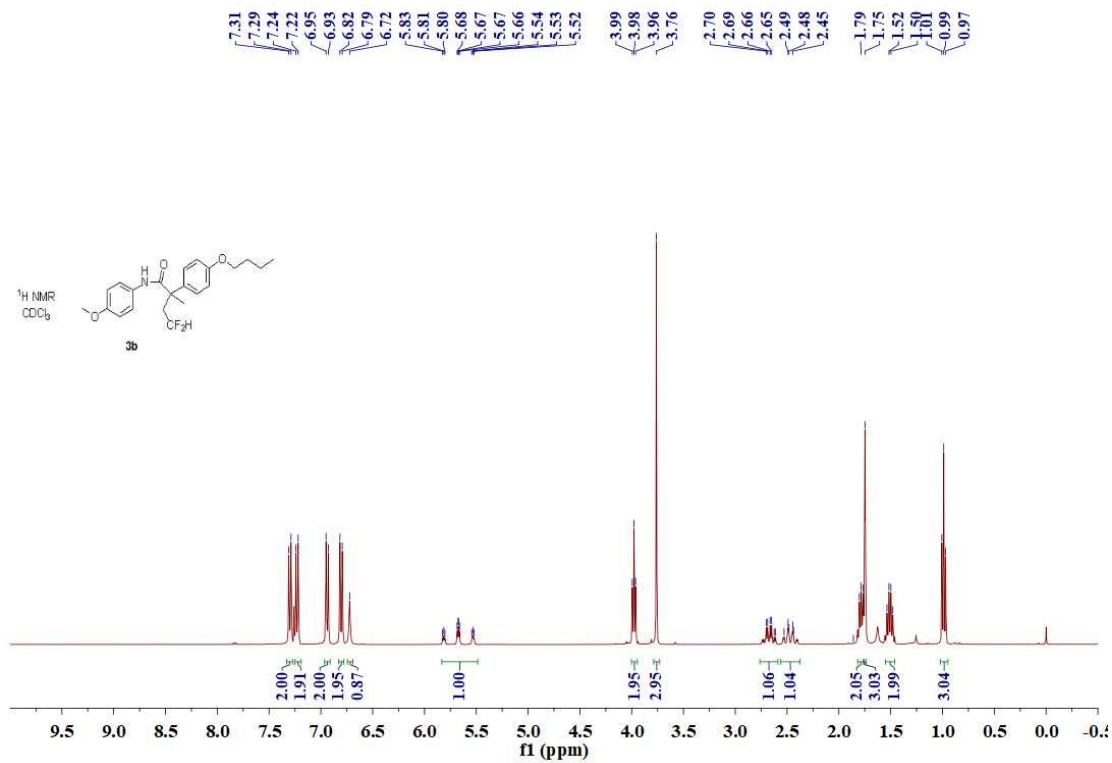

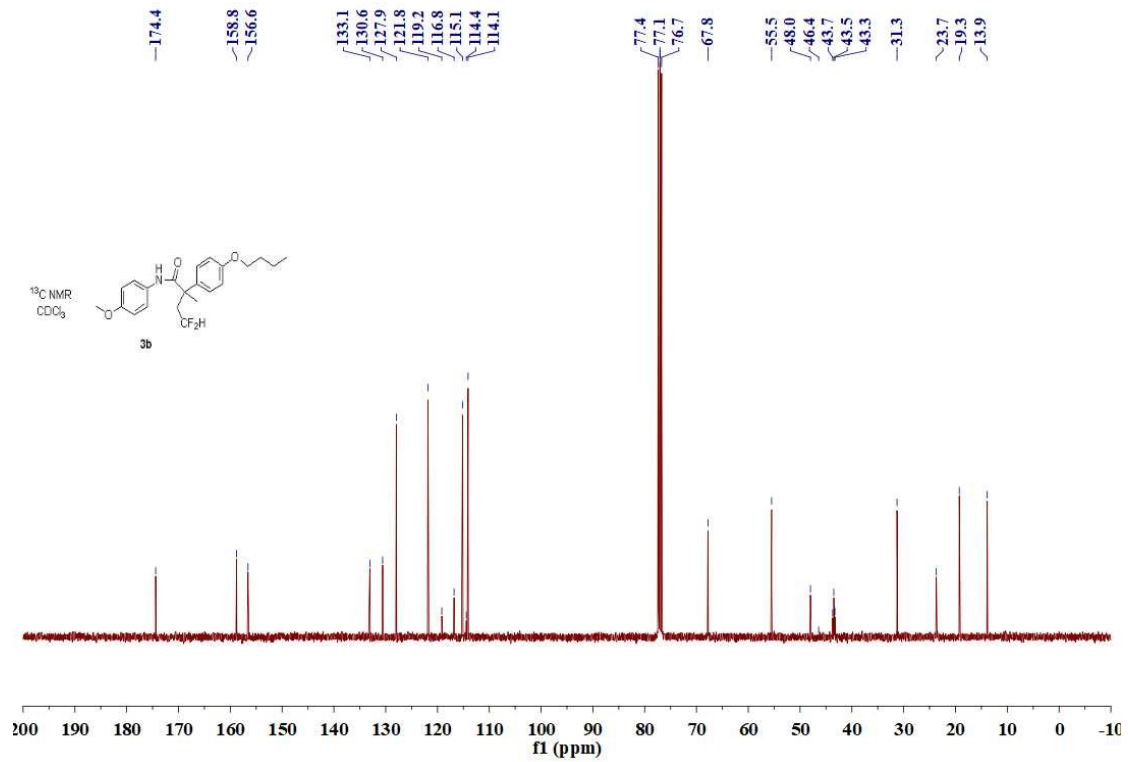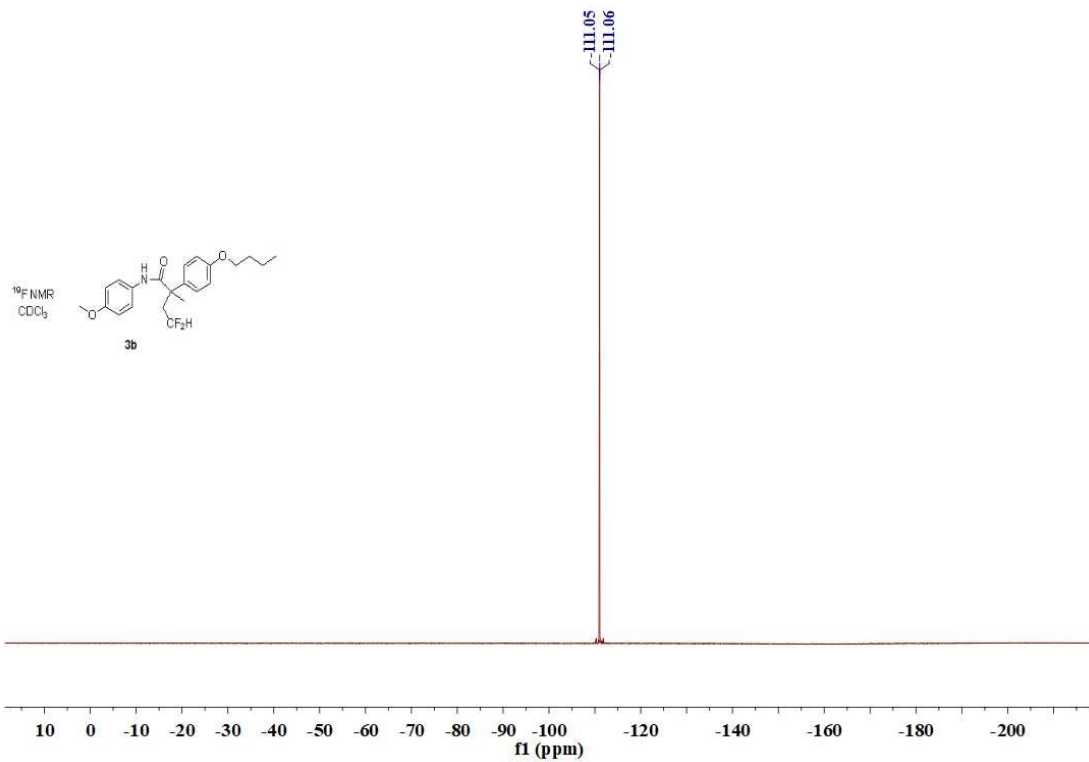

**2-(4-(benzyloxy)phenyl)-4,4-difluoro-N-(4-methoxyphenyl)-2-methylbutanamide (3c).**



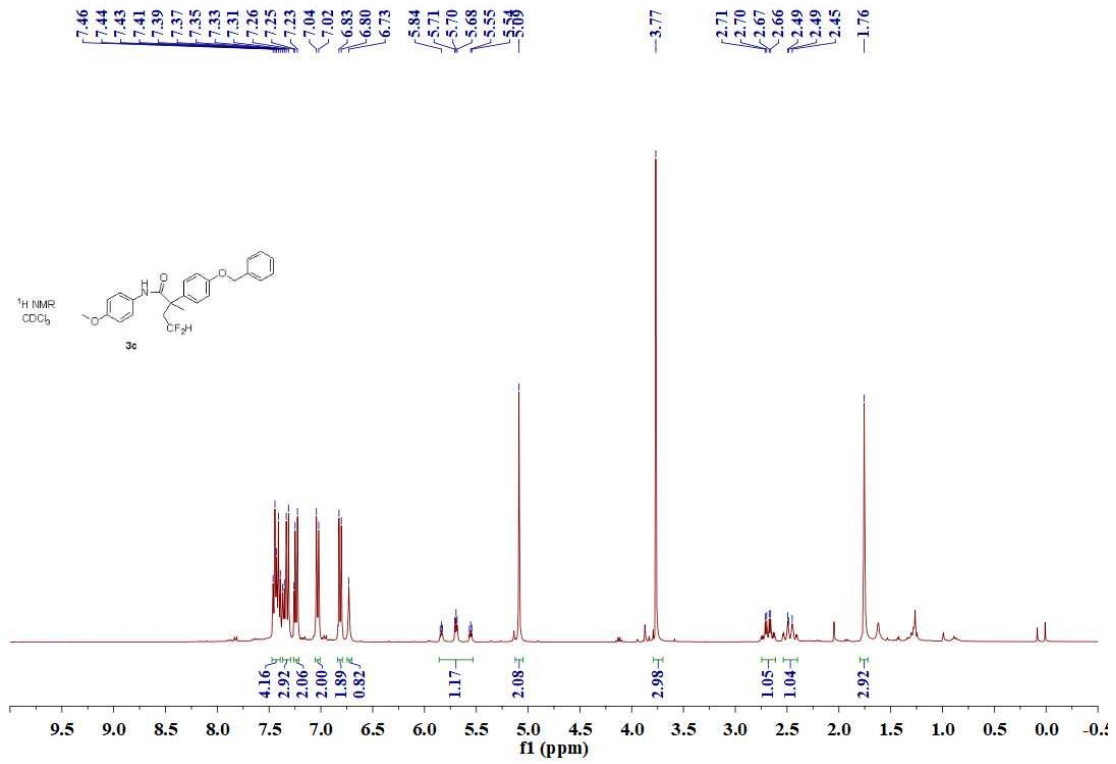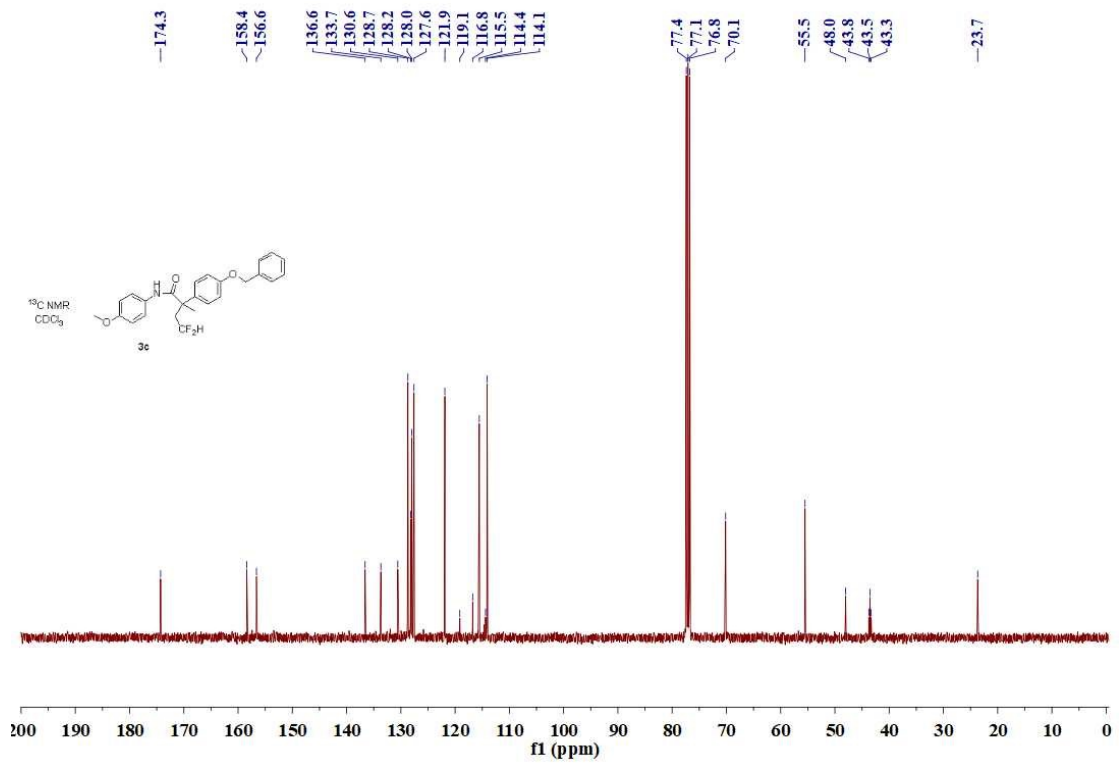

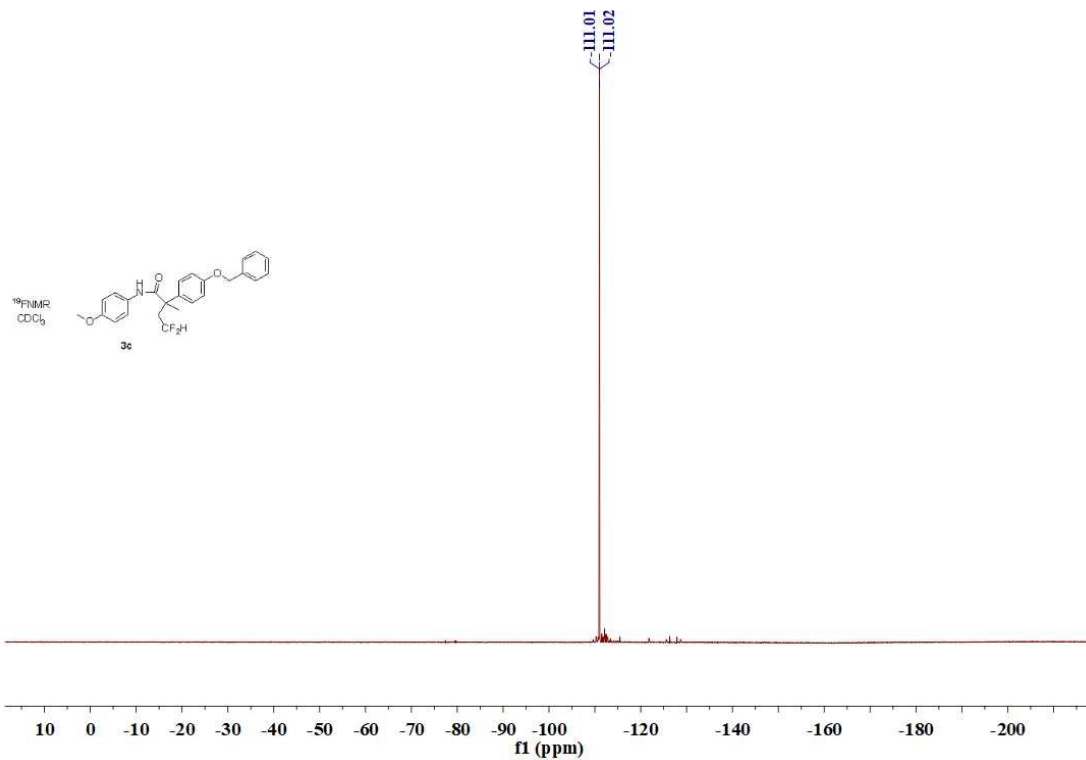

**2-([1,1'-biphenyl]-4-yl)-4,4-difluoro-N-(4-methoxyphenyl)-2-methylbutanamide (3d).**

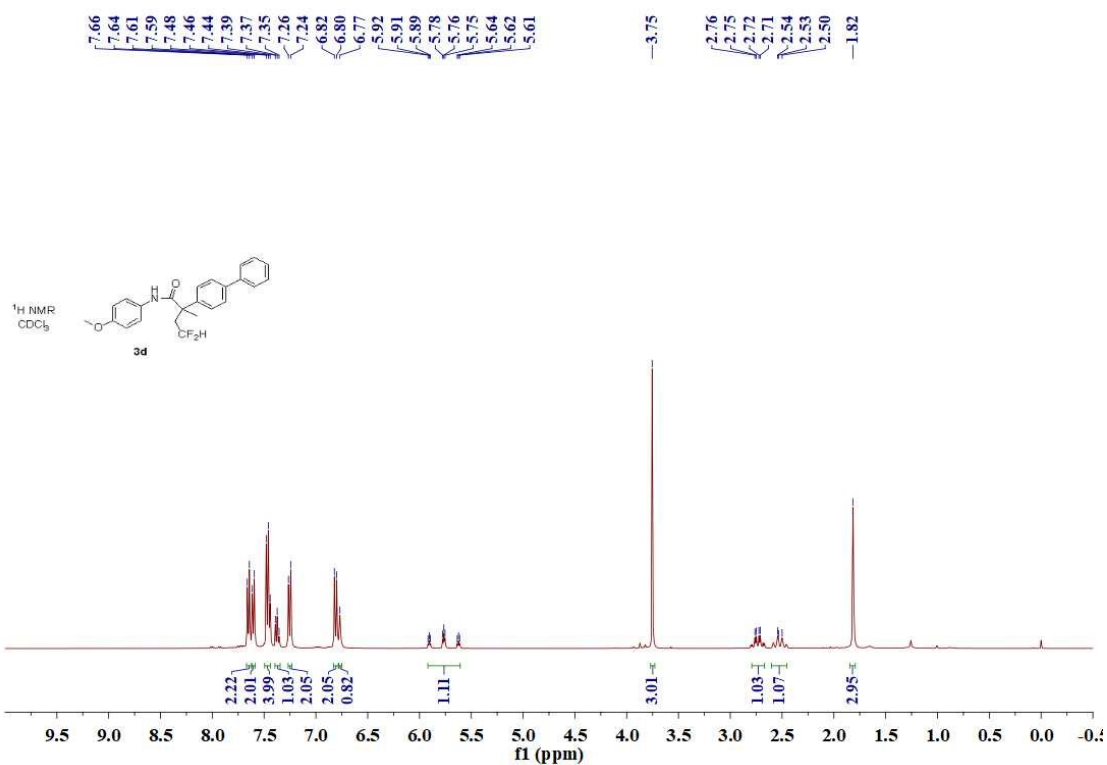

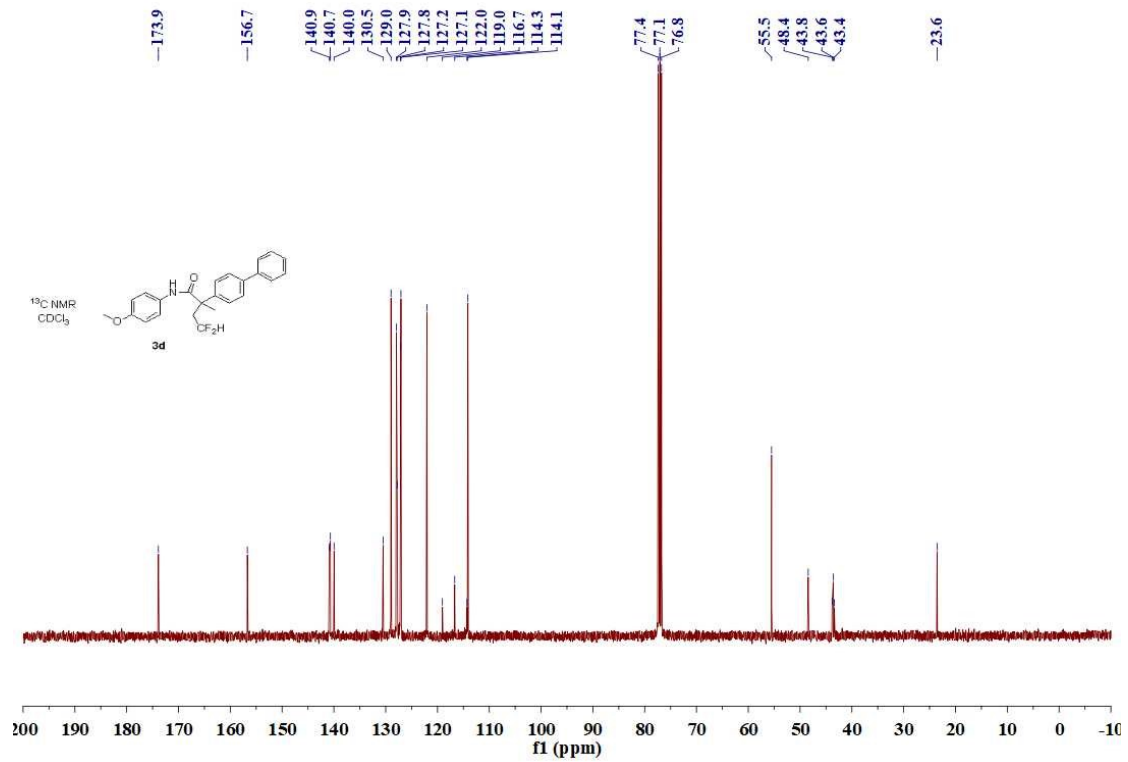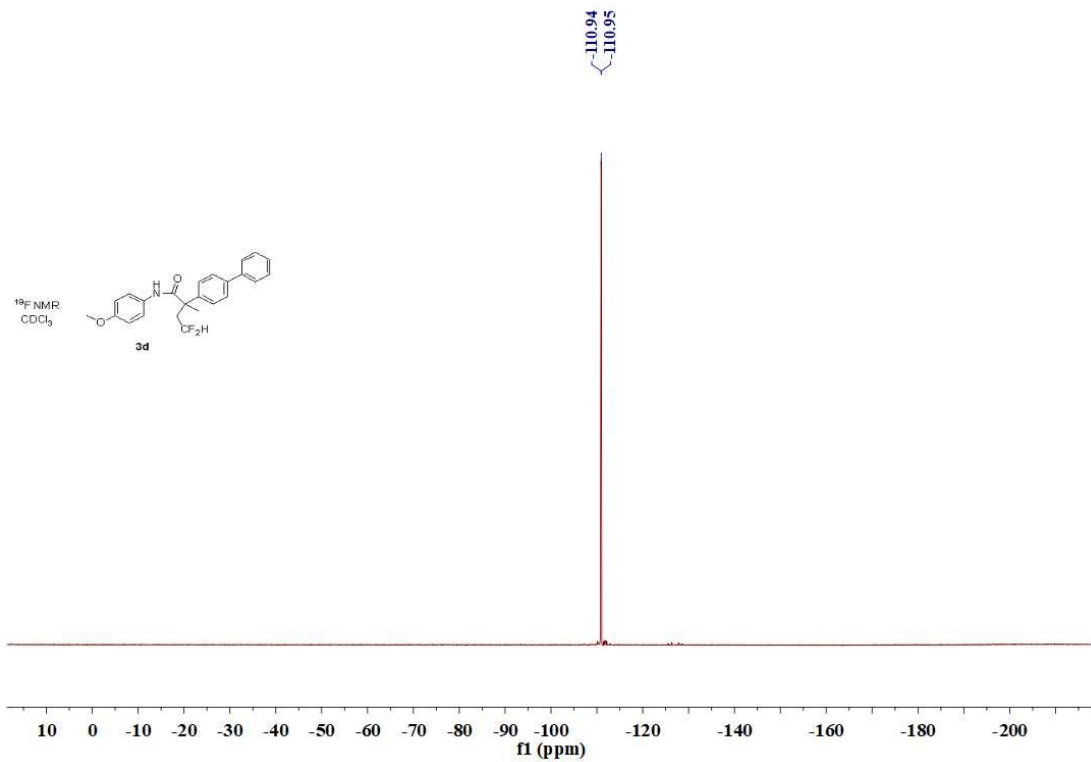

**4,4-difluoro-*N*-(4-methoxyphenyl)-2-methyl-2-(naphthalen-2-yl)butanamide (3e).**

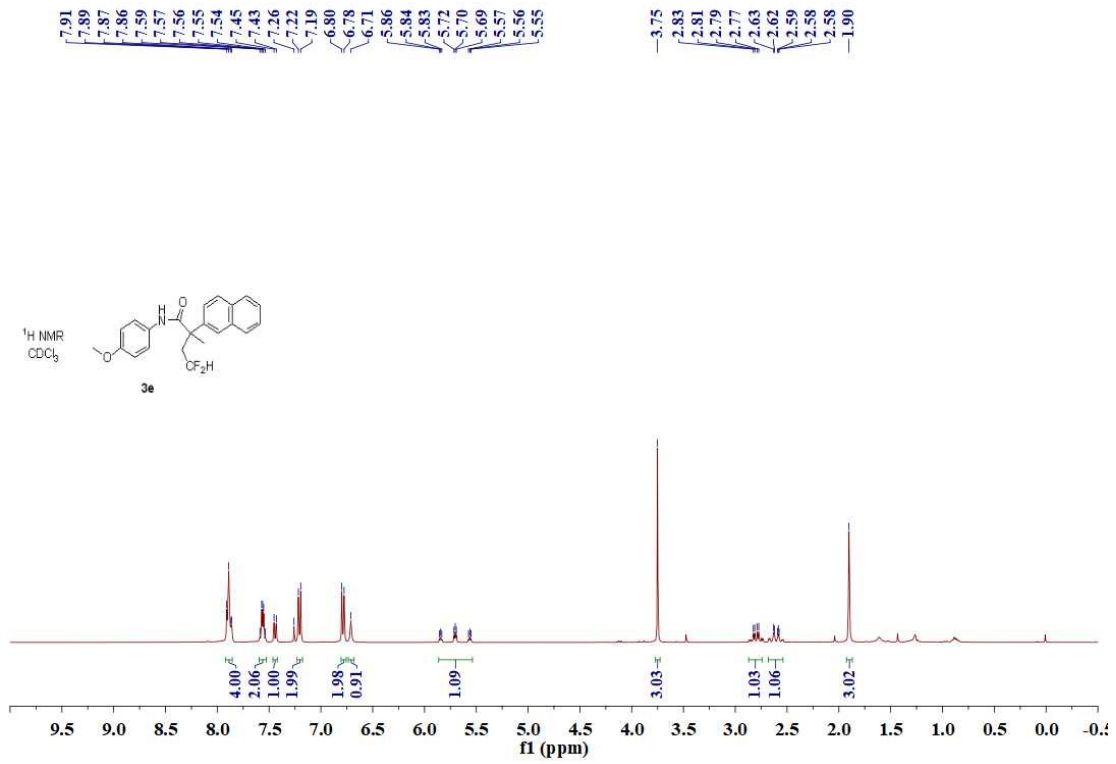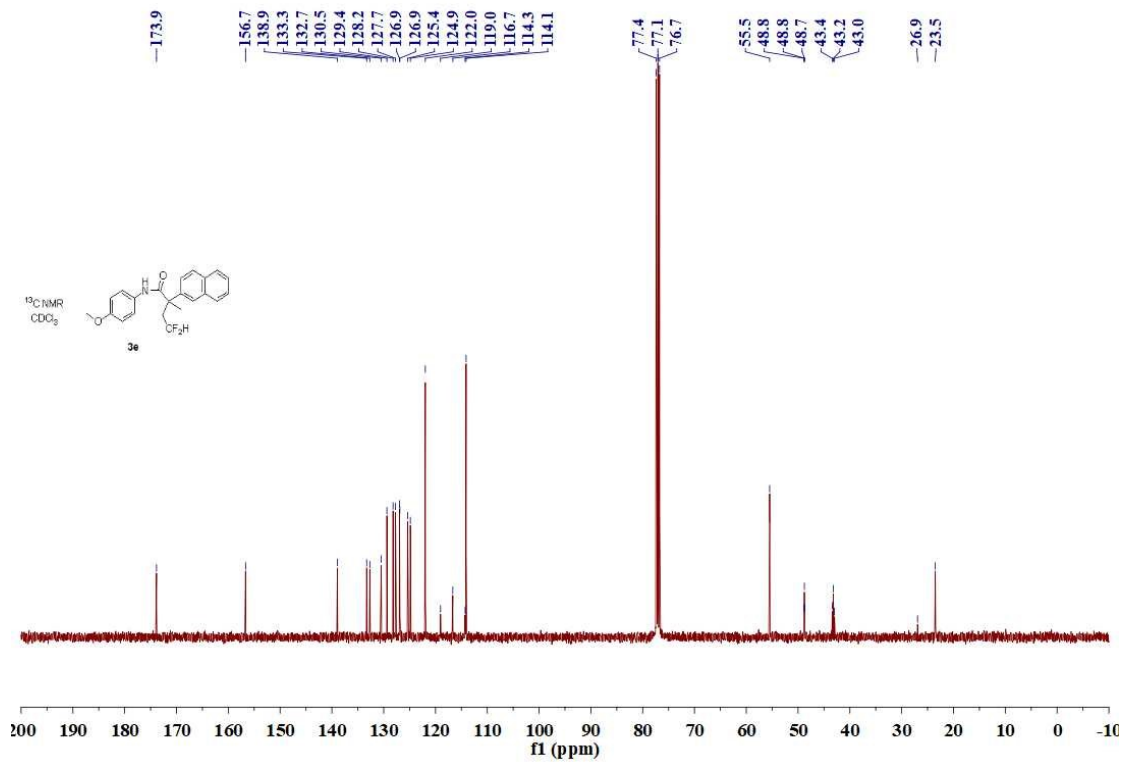

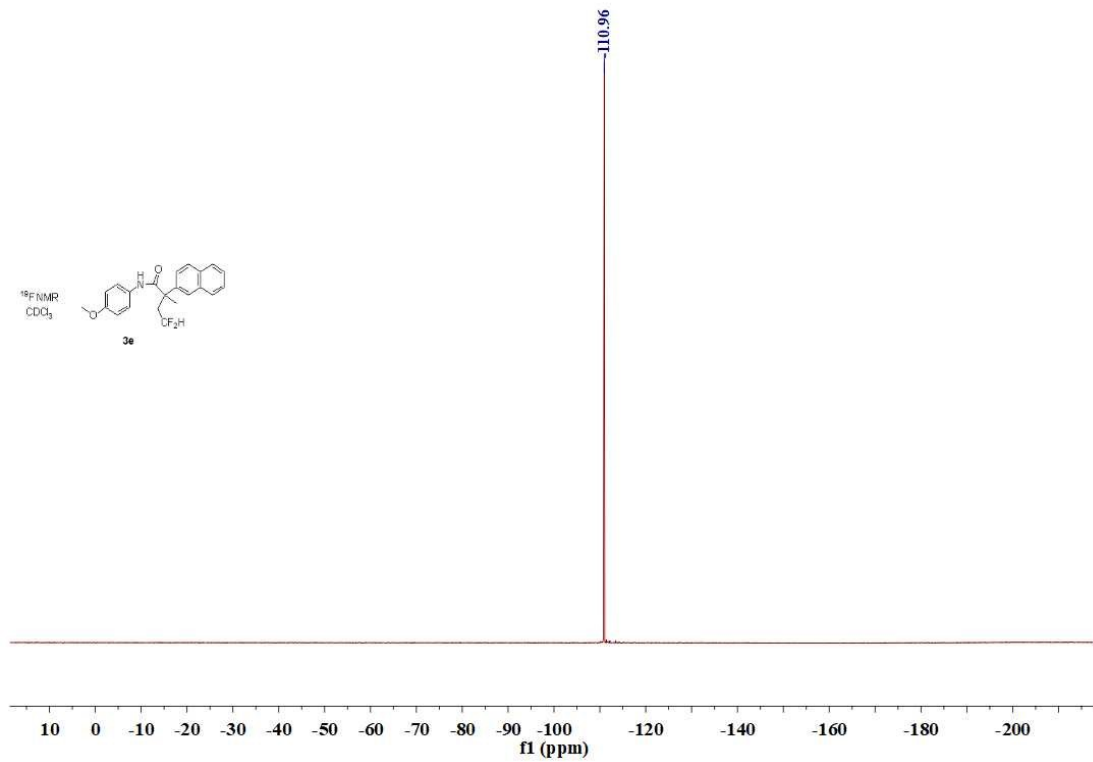

**2-(2,3-dihydrobenzofuran-5-yl)-4,4-difluoro-*N*-(4-methoxyphenyl)-2-methylbutanamide (3f).**

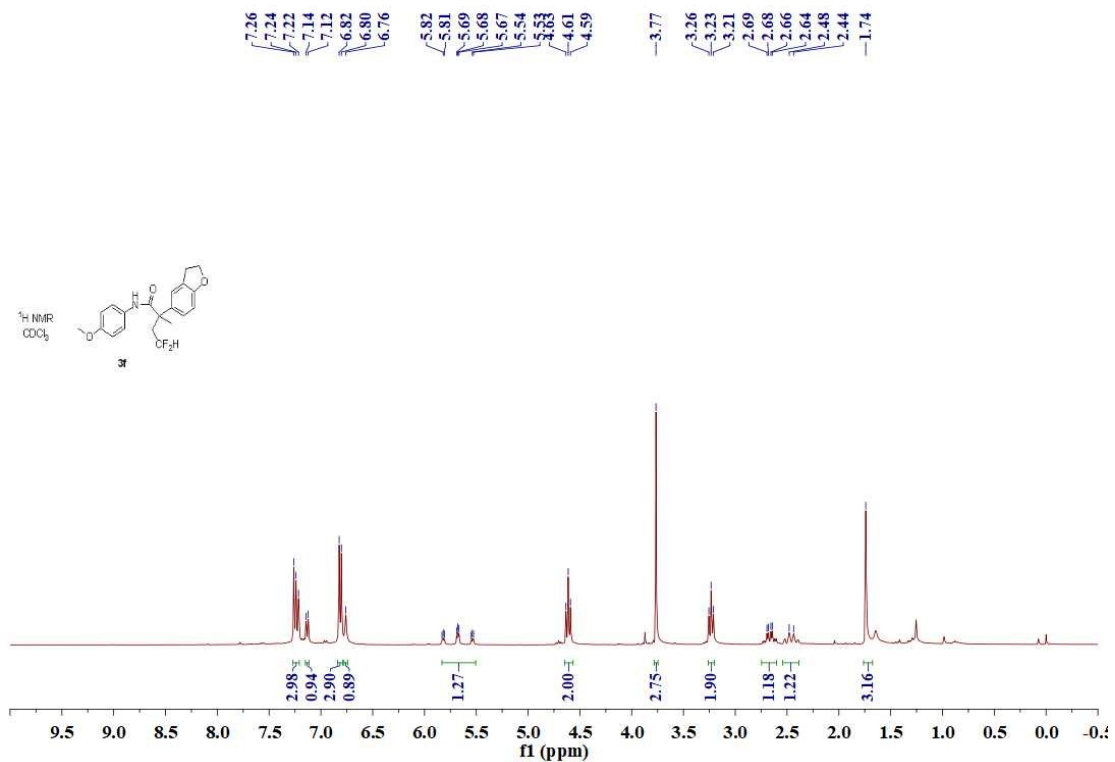

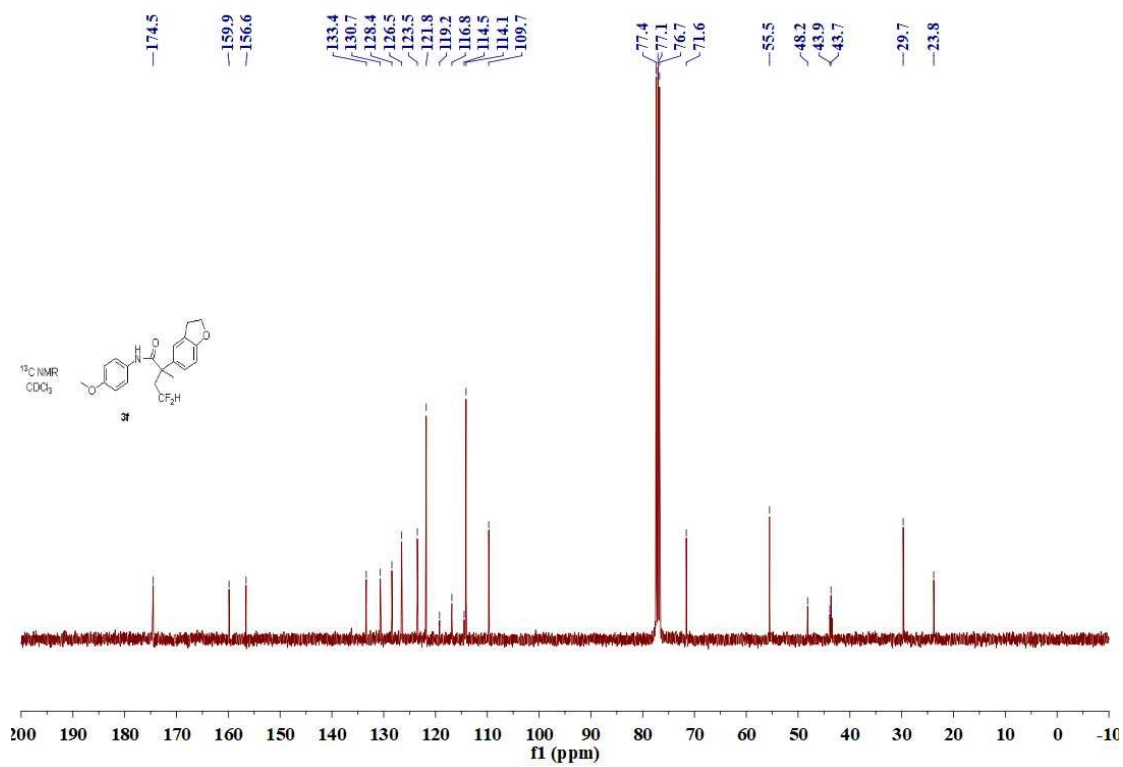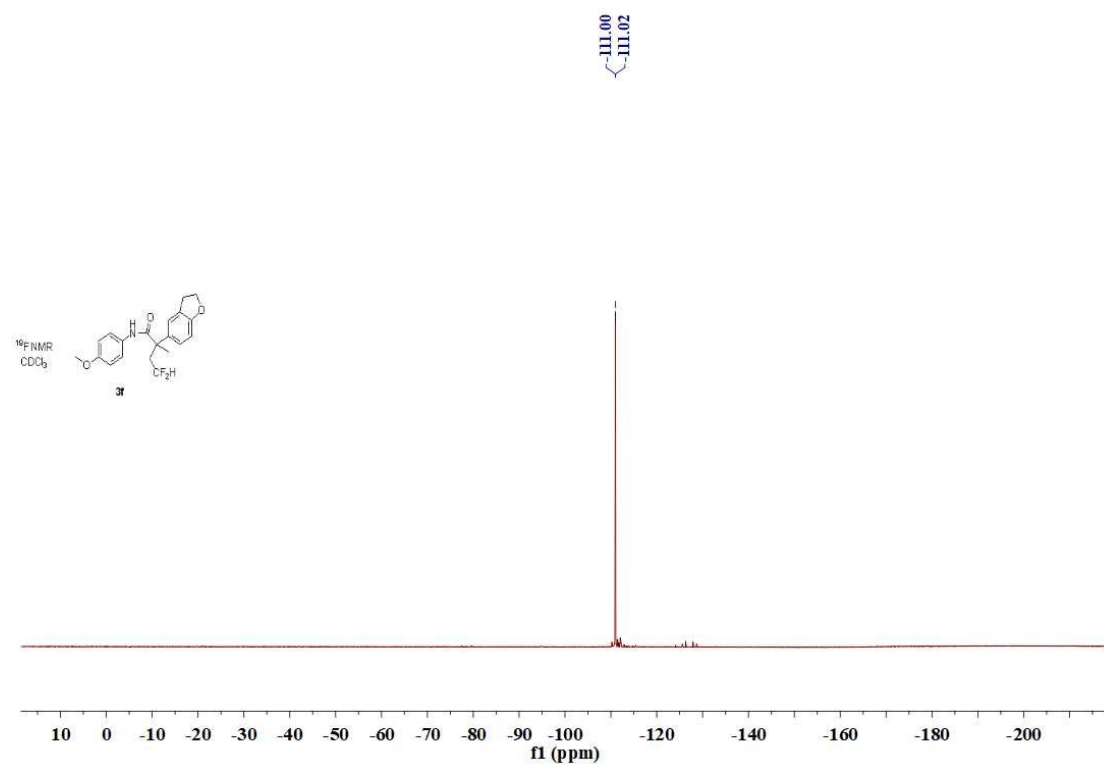

**2-(4-cyclohexylphenyl)-4,4-difluoro-N-(4-methoxyphenyl)-2-methylbutanamide (3g).**

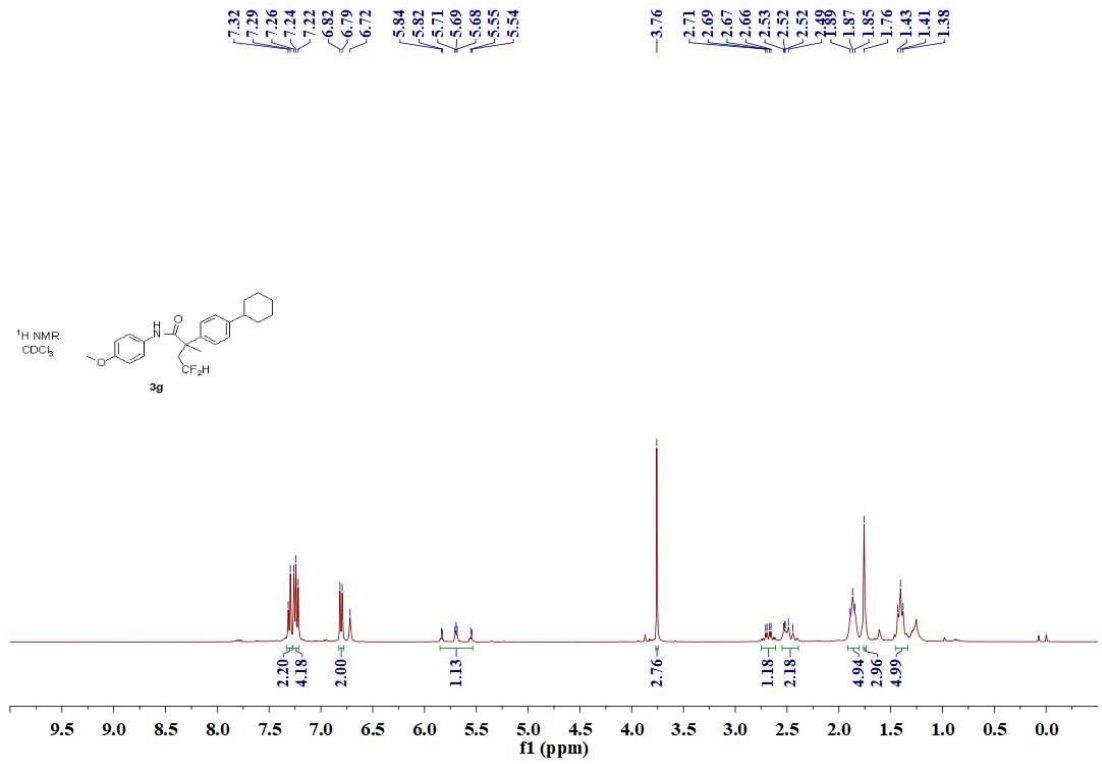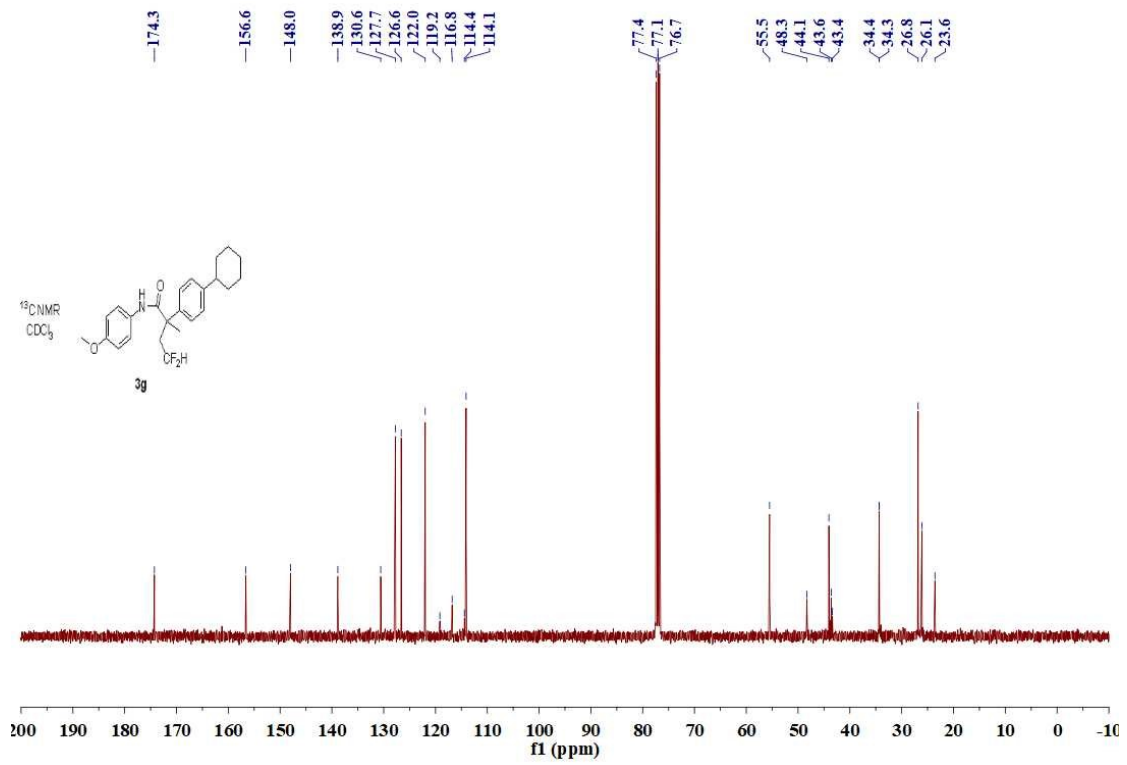

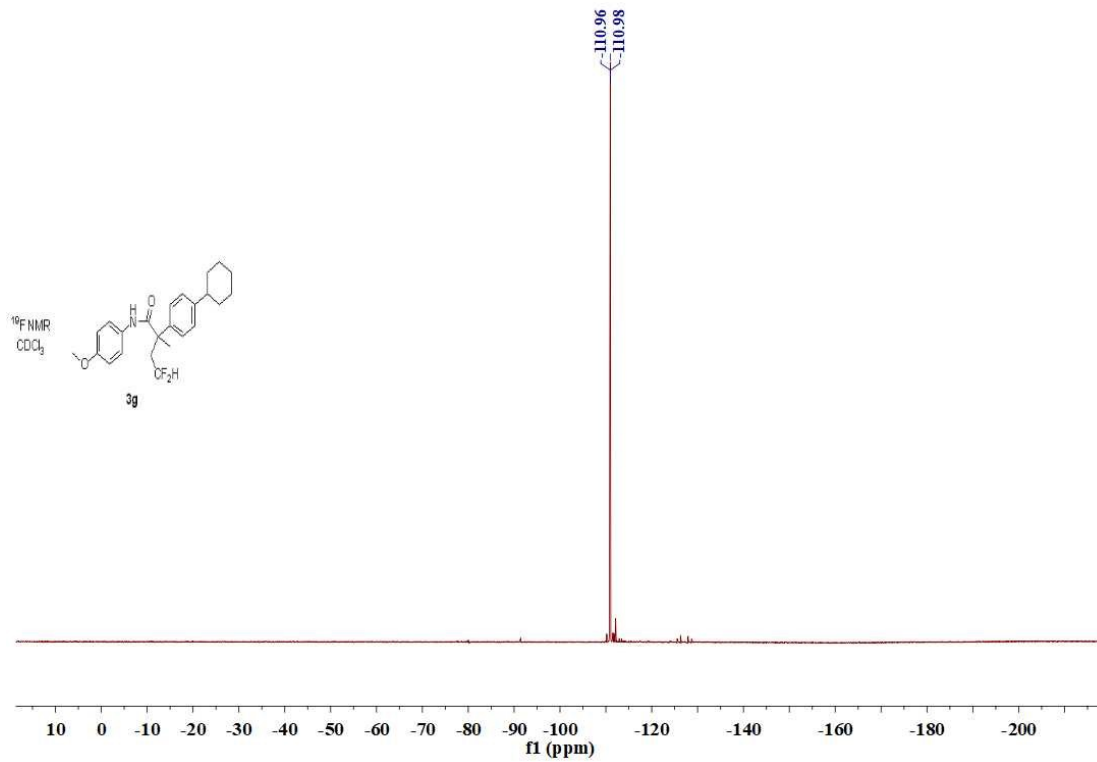

**2-(4-(tert-butyl)phenyl)-4,4-difluoro-N-(4-methoxyphenyl)-2-methylbutanamide (3h).**

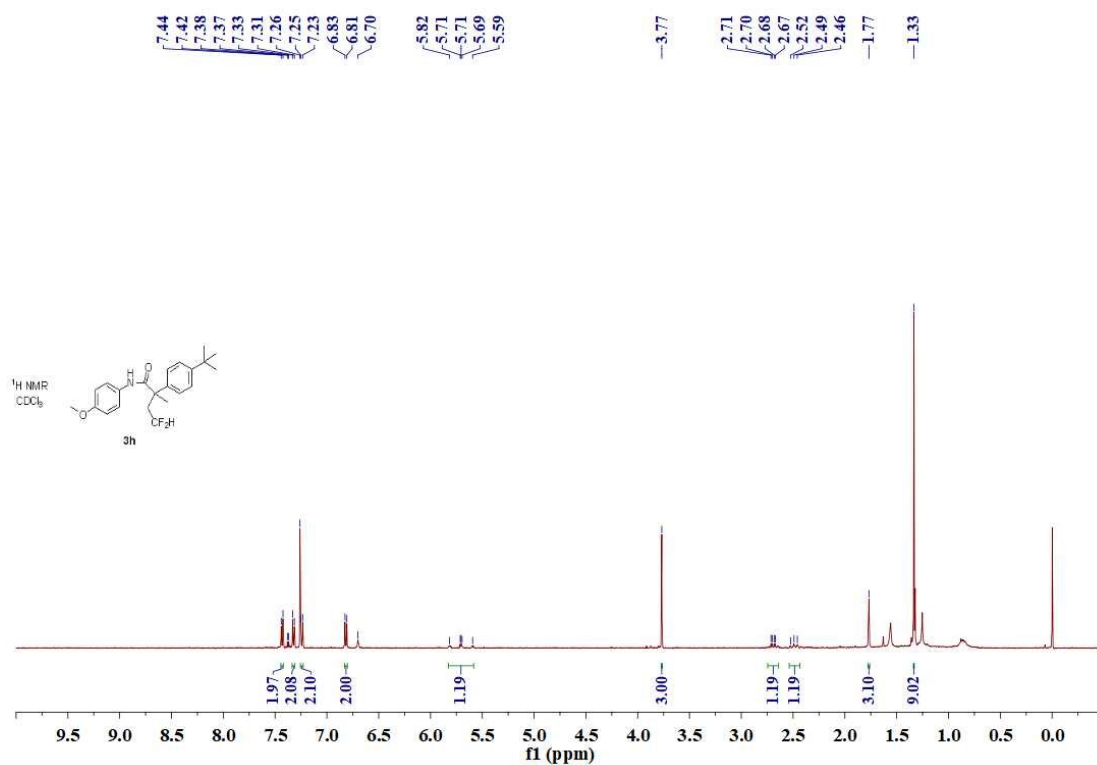



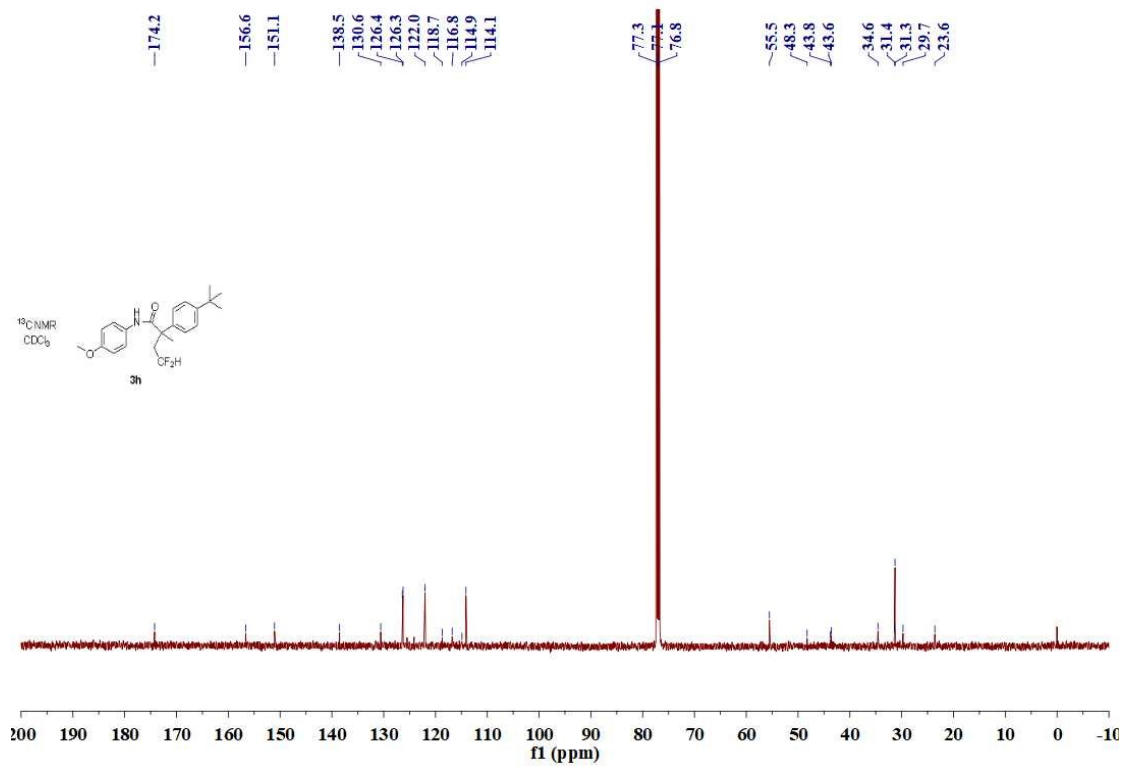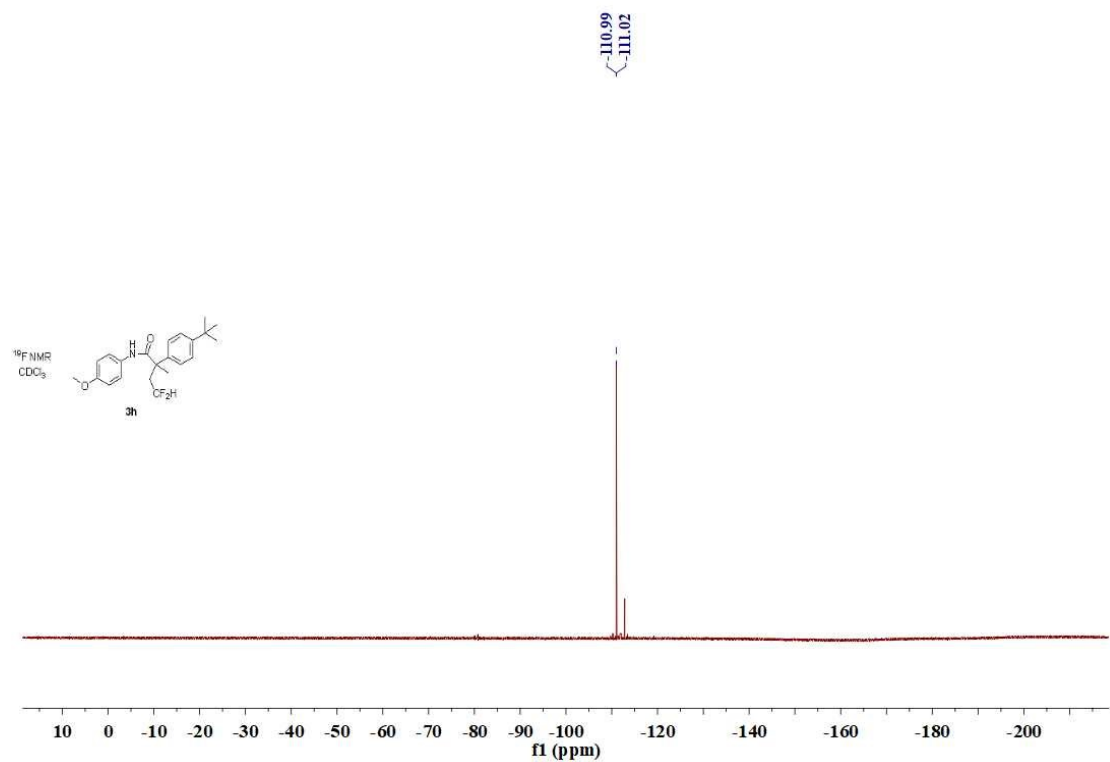

**4,4-difluoro-2-mesityl-*N*-(4-methoxyphenyl)-2-methylbutanamide (3i).**

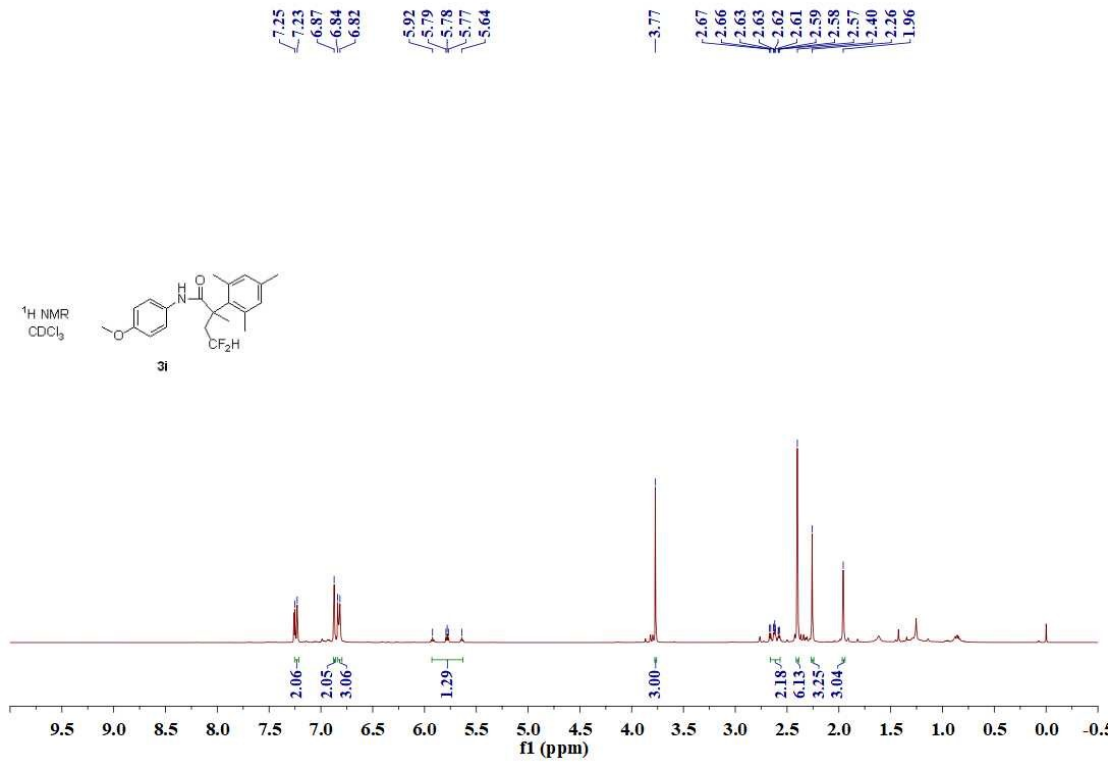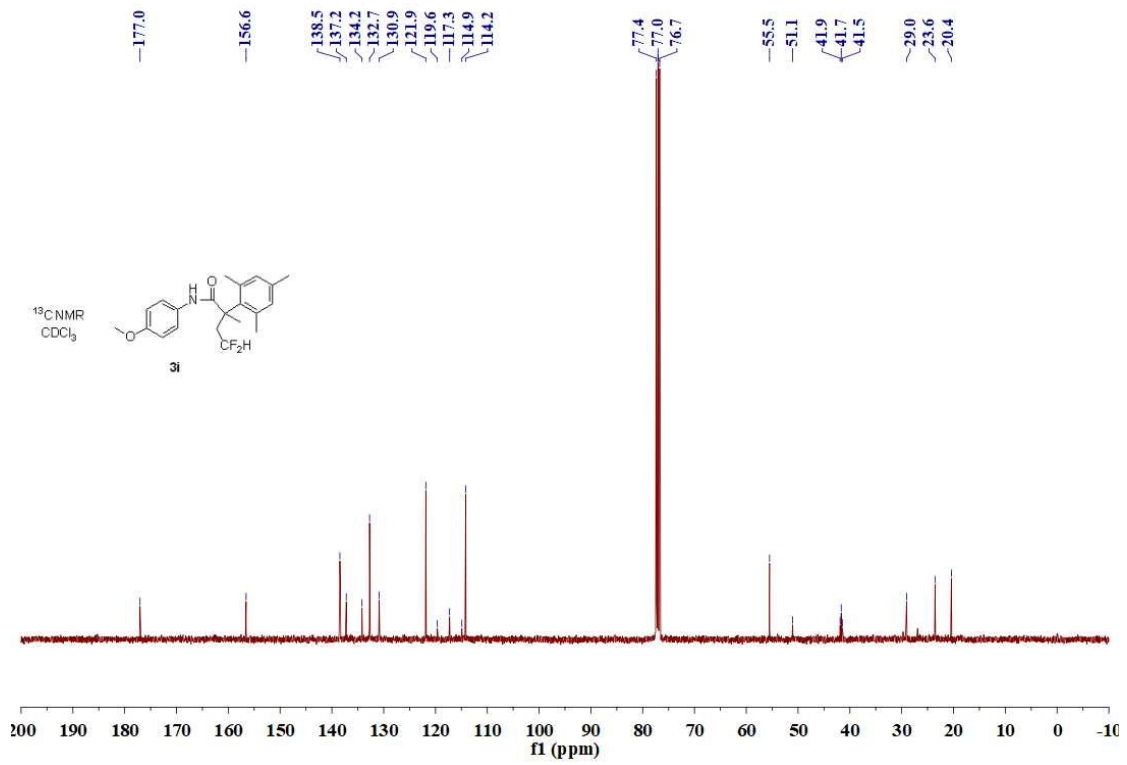

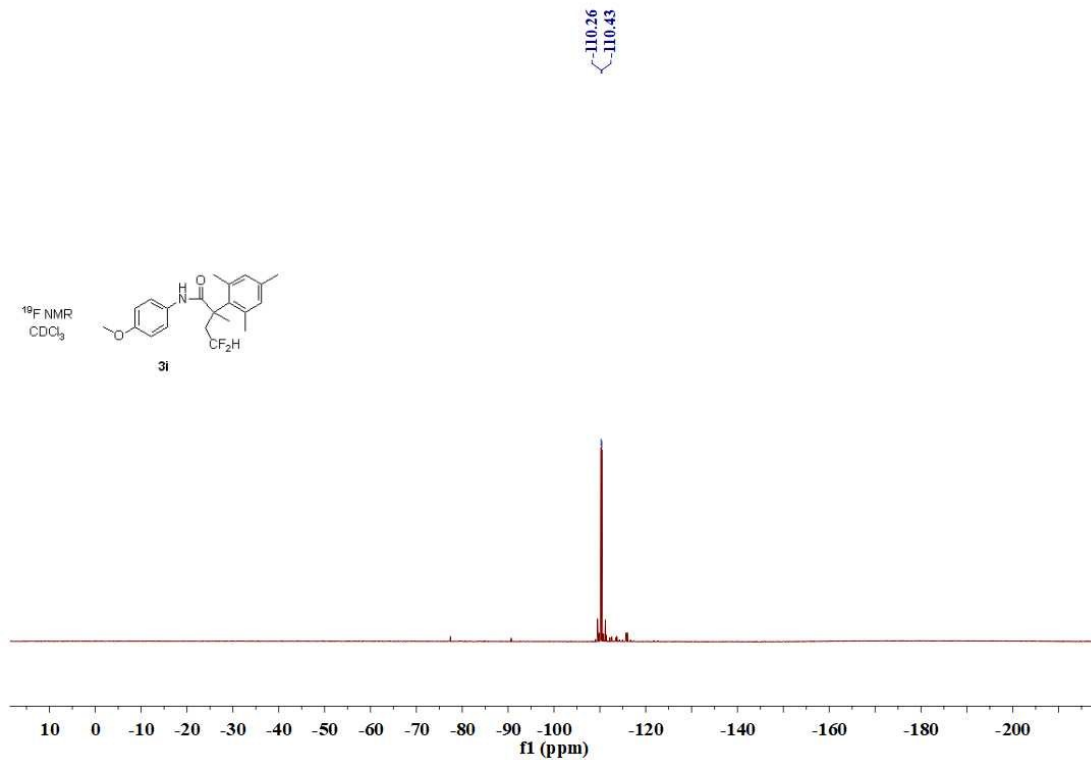

**2-(4-ethylphenyl)-4,4-difluoro-N-(4-methoxyphenyl)-2-methylbutanamide (3j).**

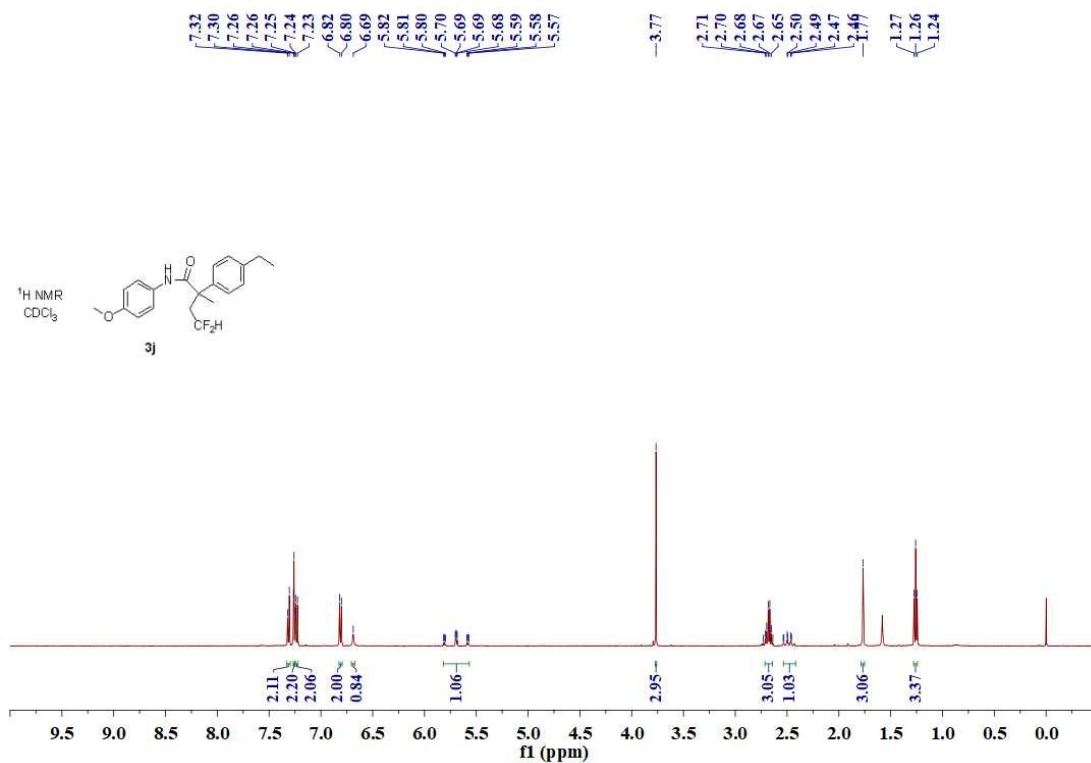

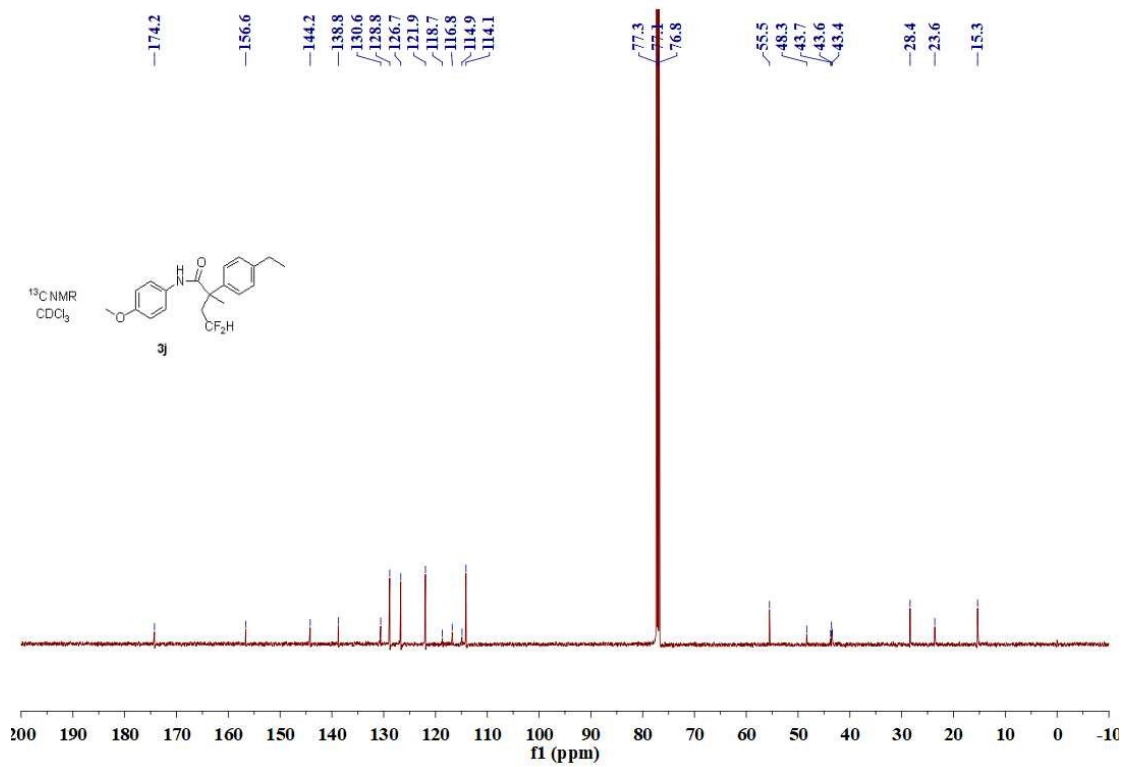

111.02  
111.03

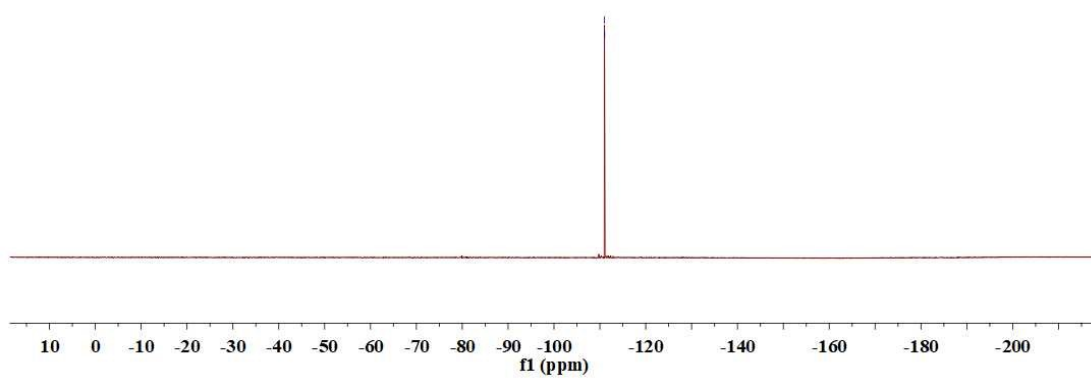

**4,4-difluoro-*N*-(4-methoxyphenyl)-2-methyl-2-(*o*-tolyl)butanamide (3k).**

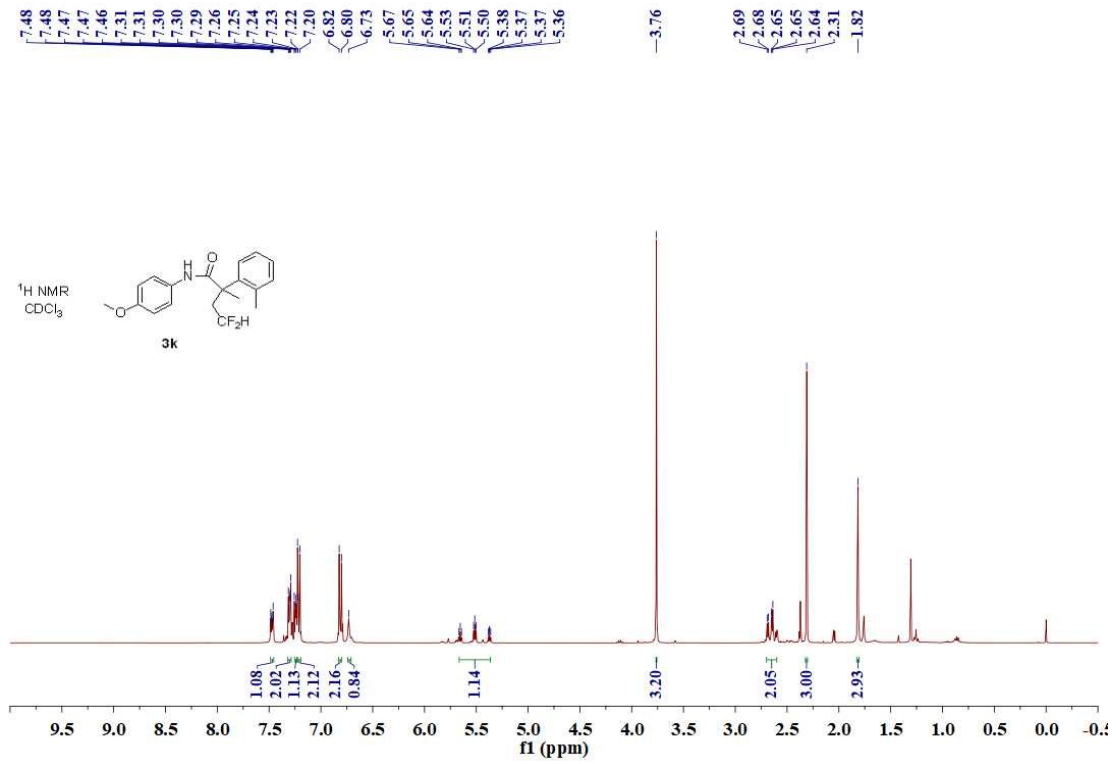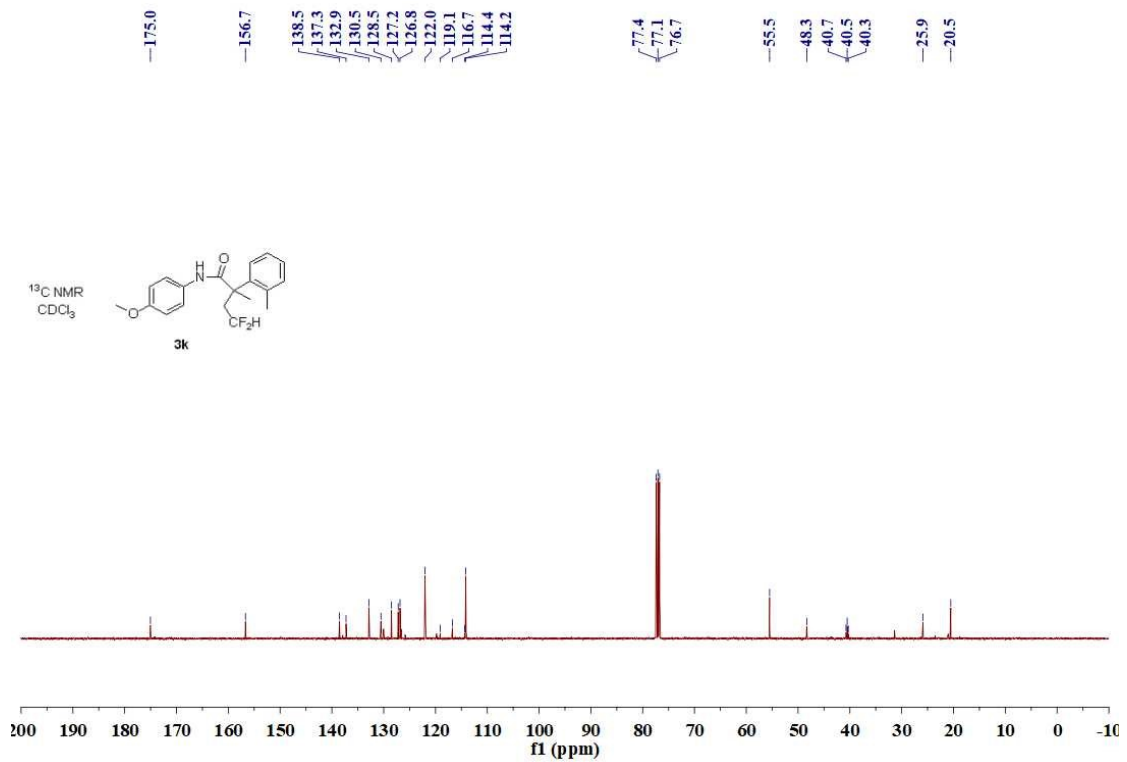

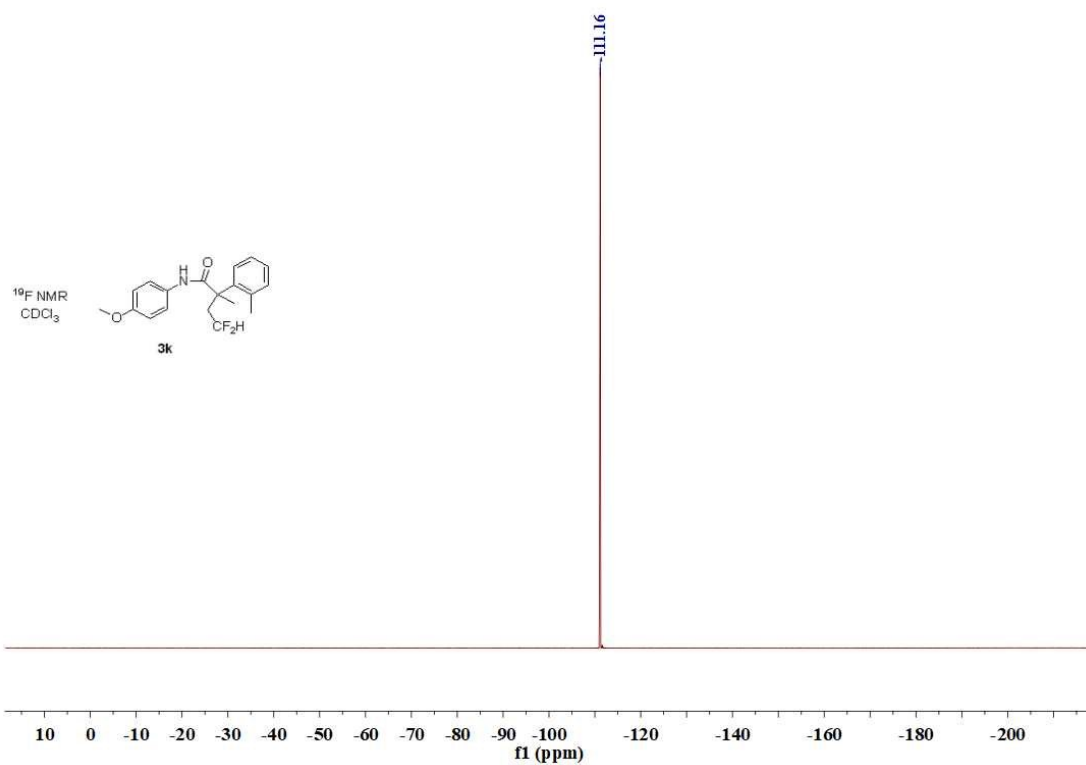

*N*-(3,4-dimethoxyphenyl)-4,4-difluoro-2-methyl-2-(*p*-tolyl)butanamide (**3l**).

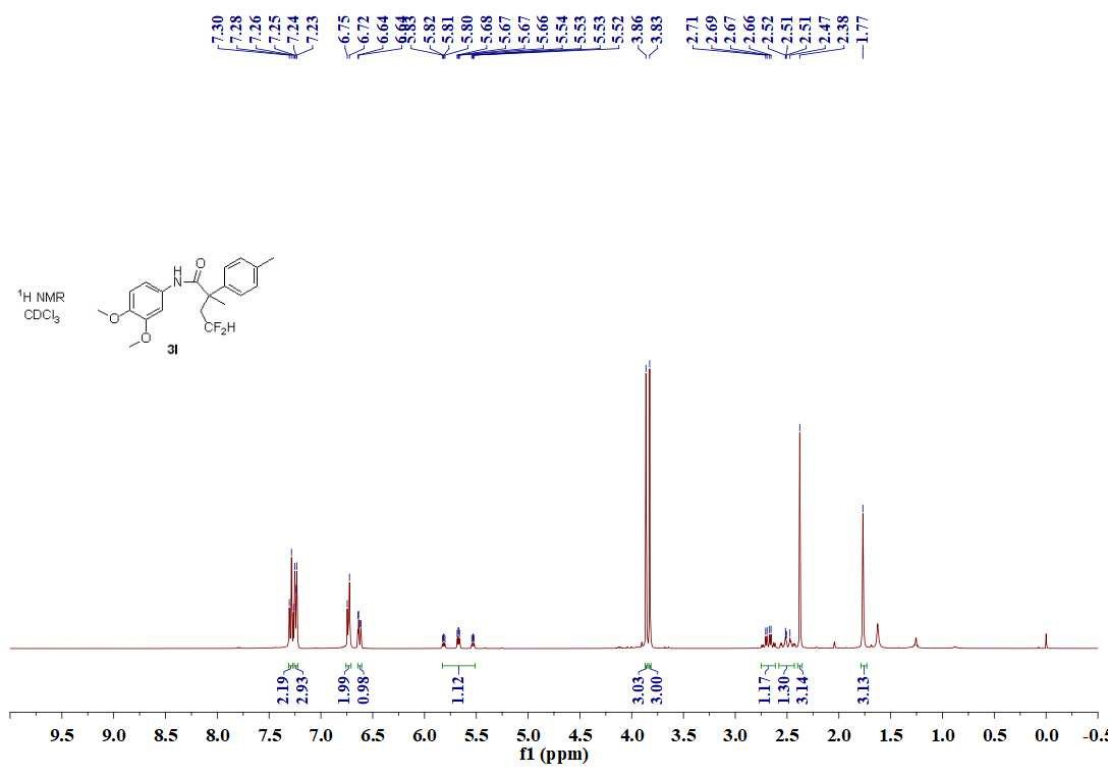

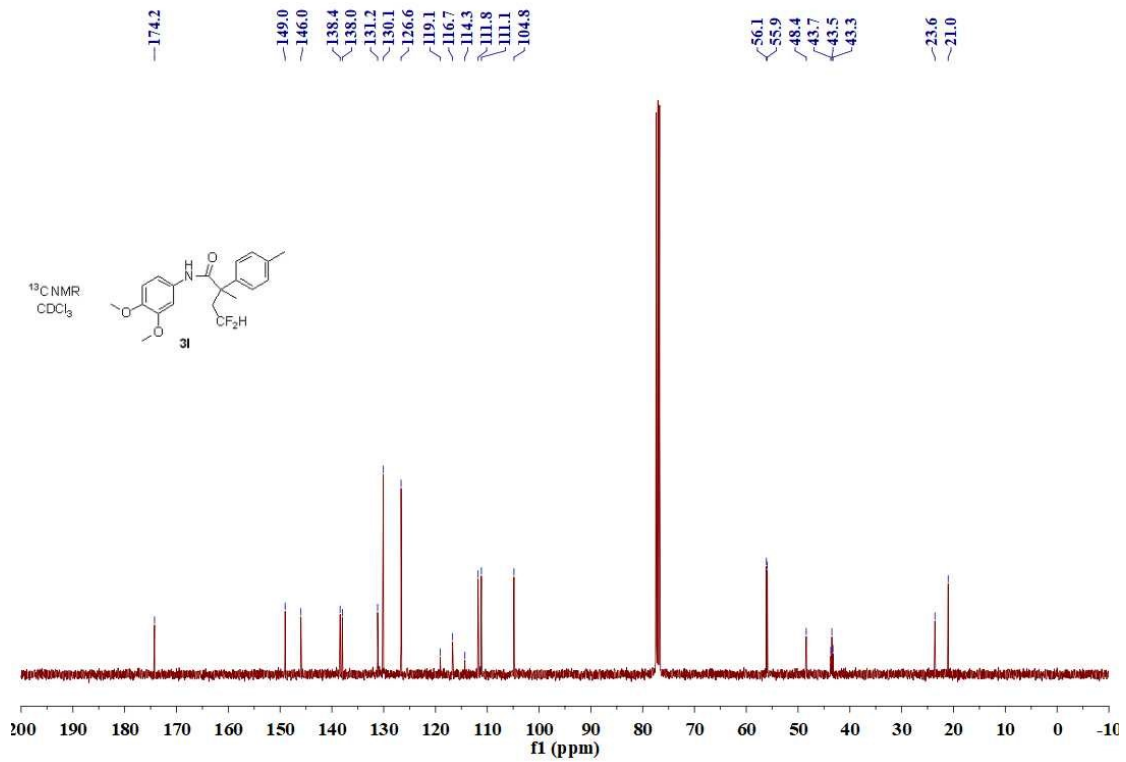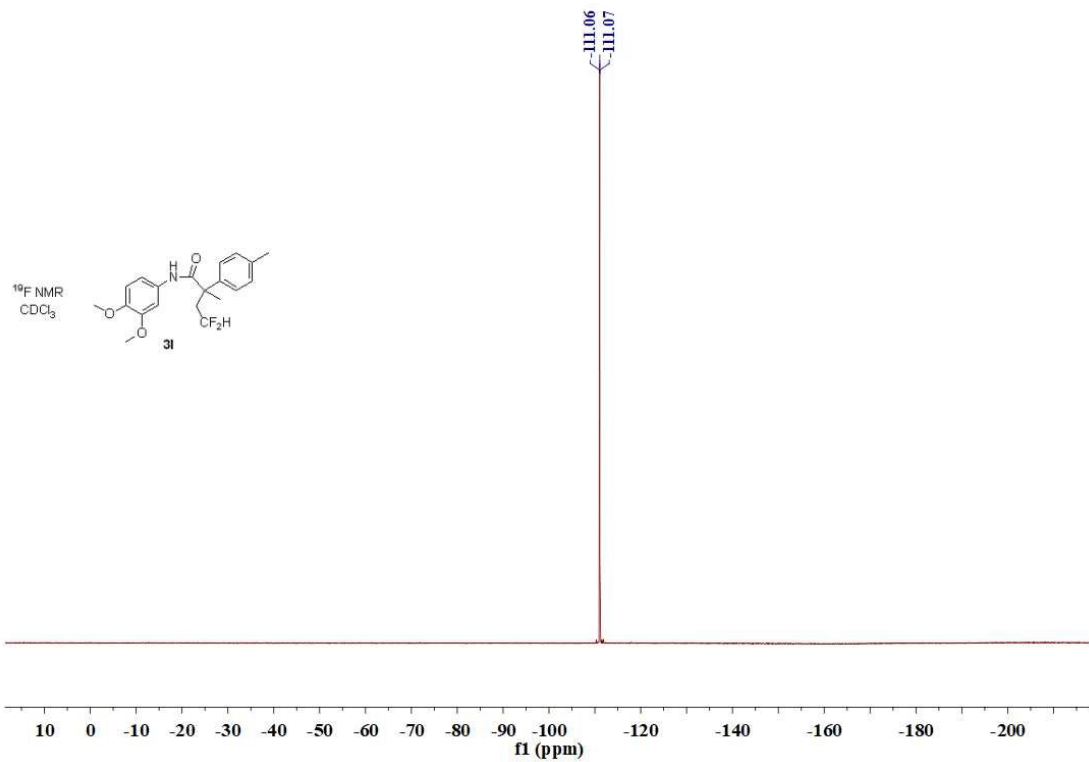

***N*-(2-bromo-4-methoxyphenyl)-4,4-difluoro-2-methyl-2-(*p*-tolyl)butanamide (3m).**

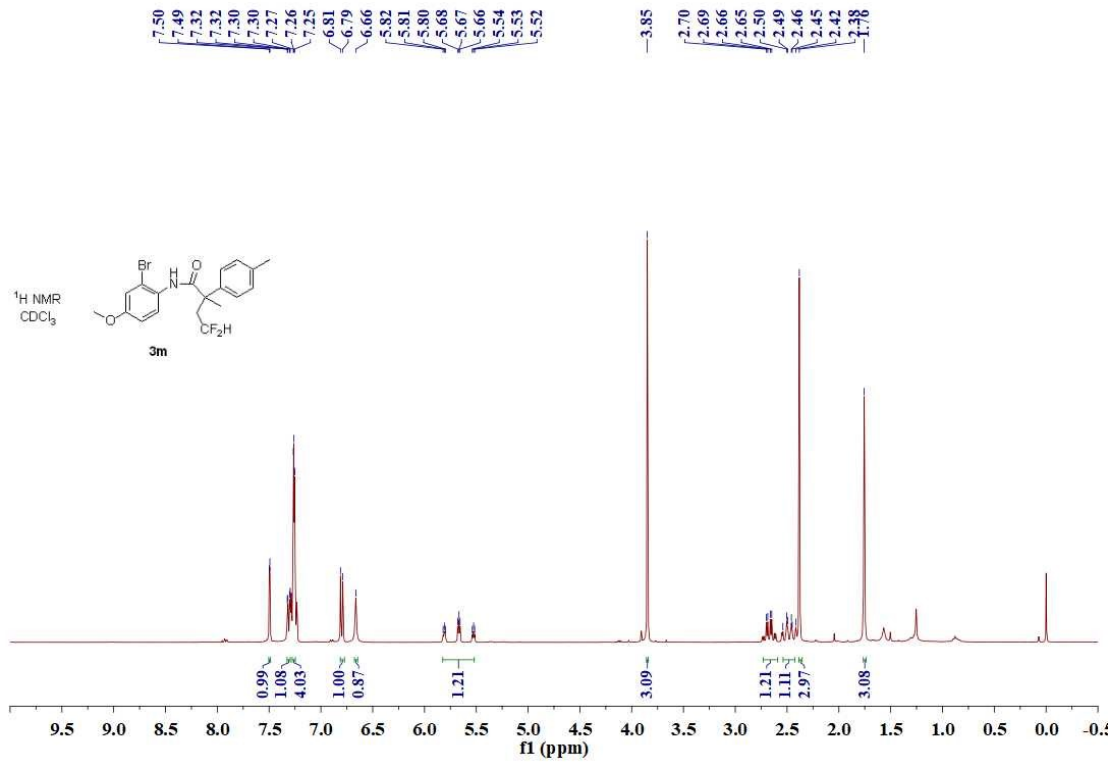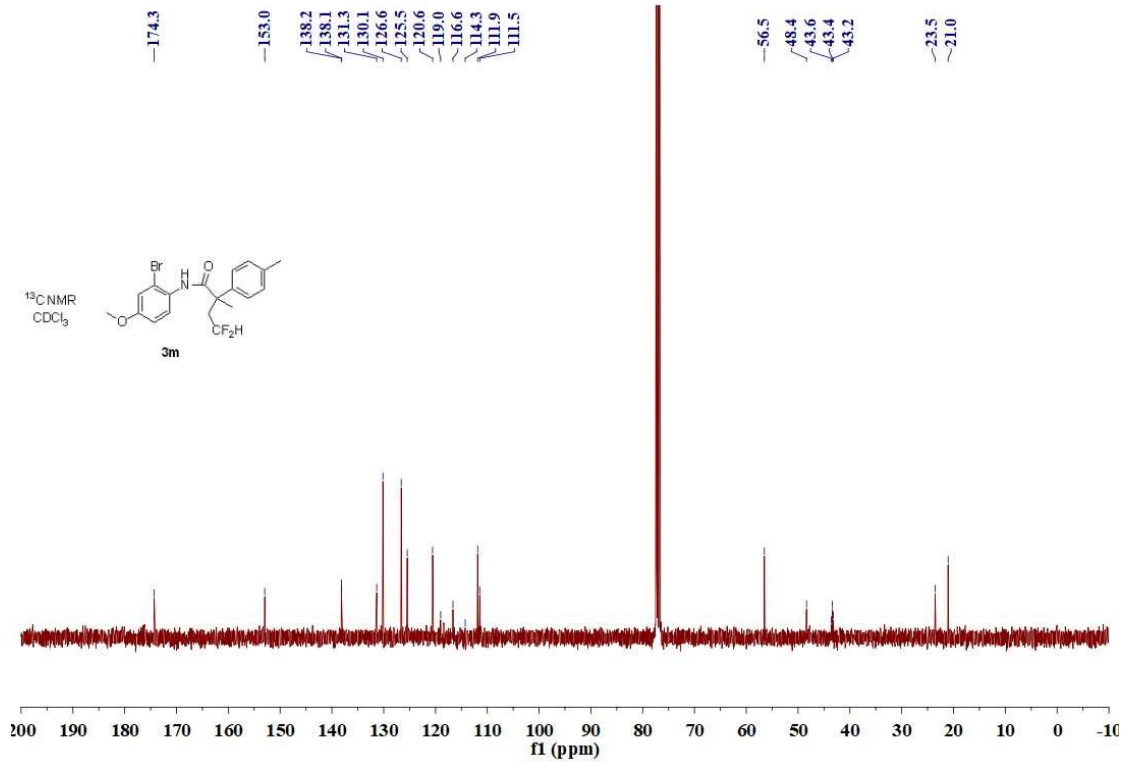



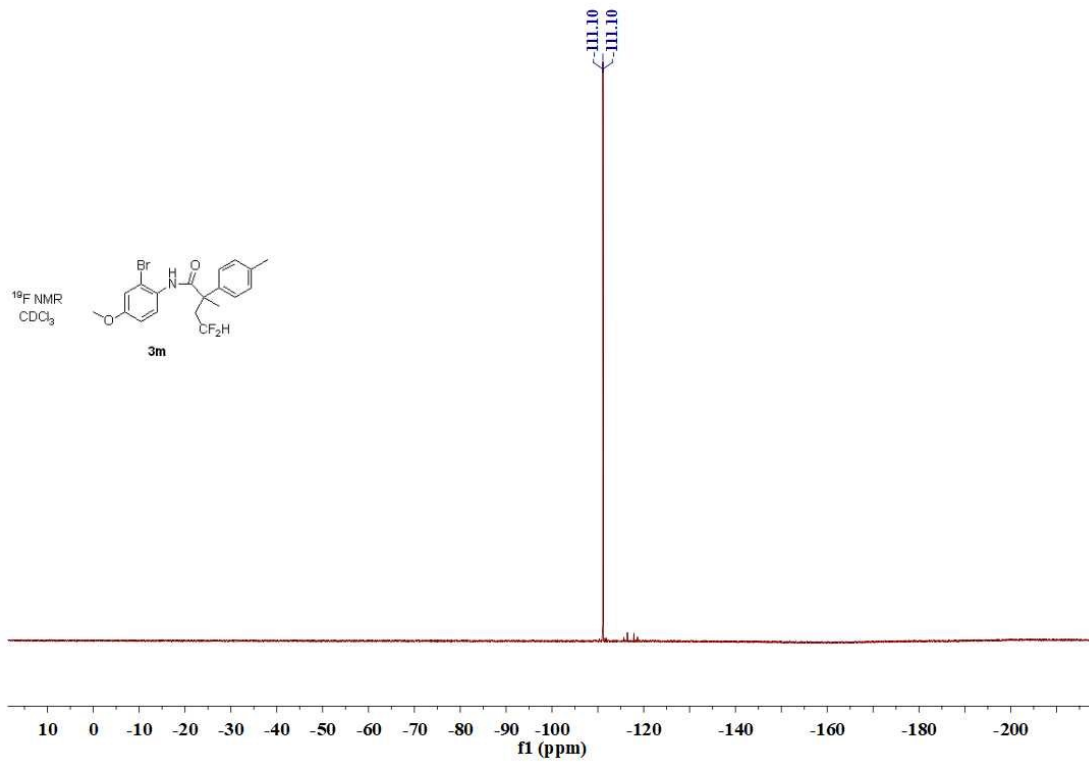

*N*-(2,4-dimethylphenyl)-4,4-difluoro-2-methyl-2-(*p*-tolyl)butanamide (**3n**).

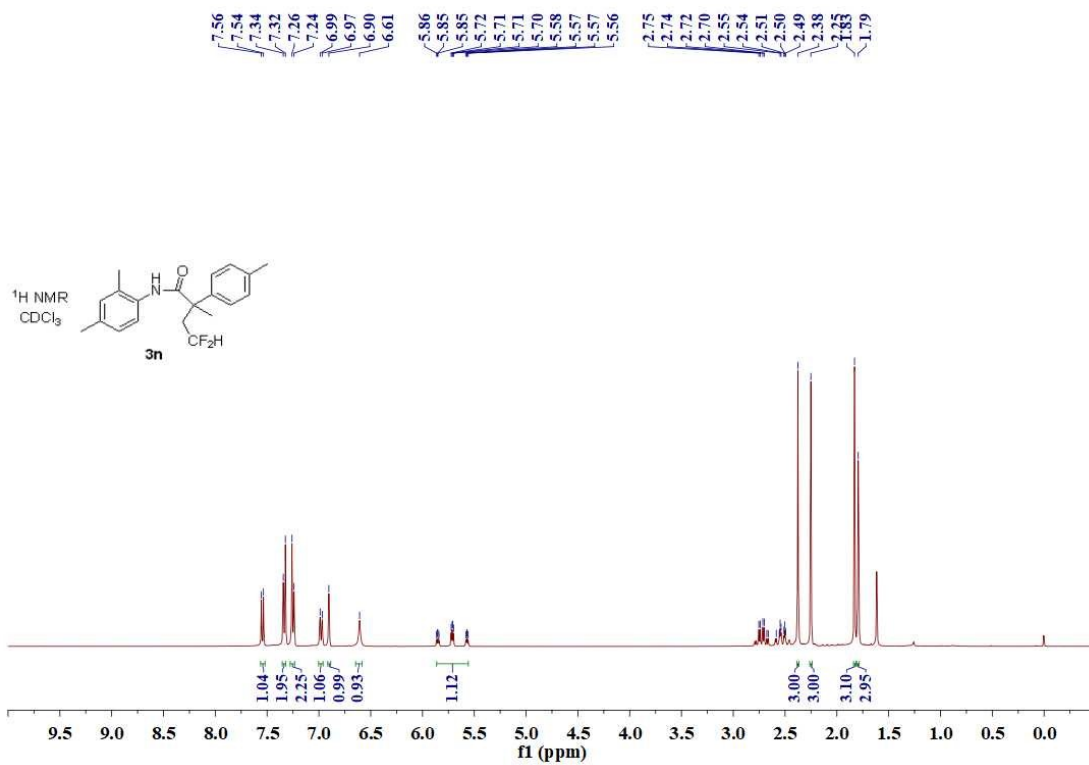

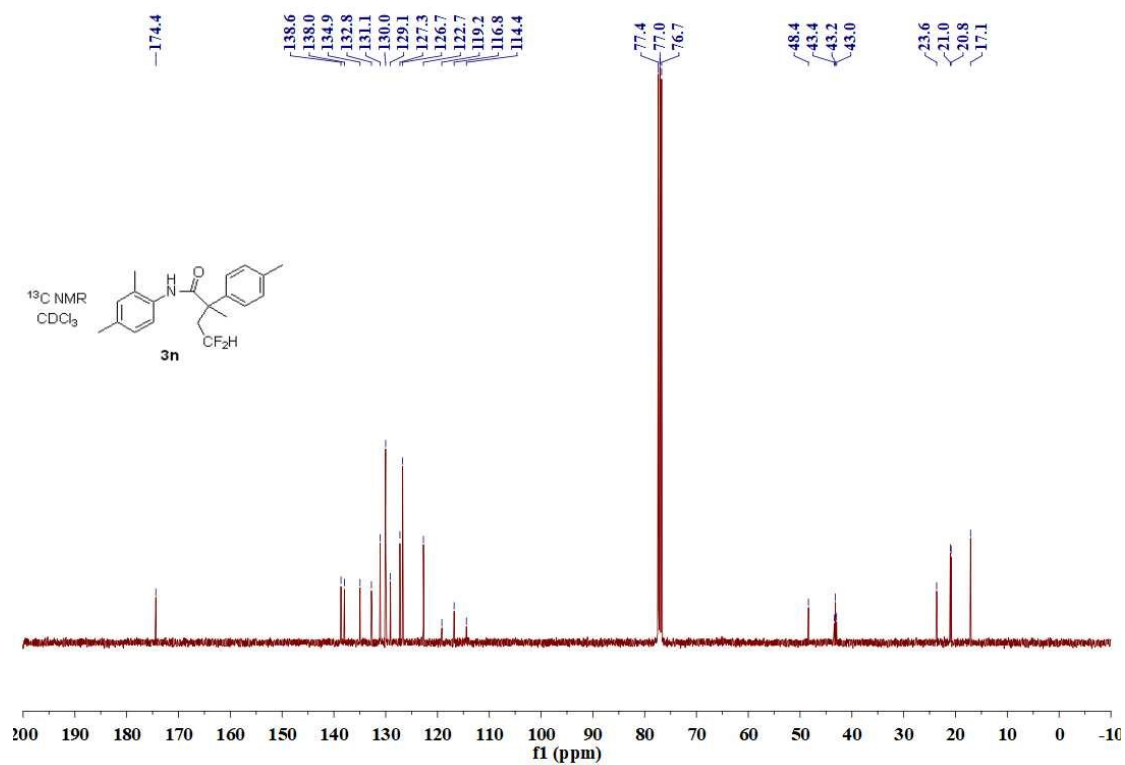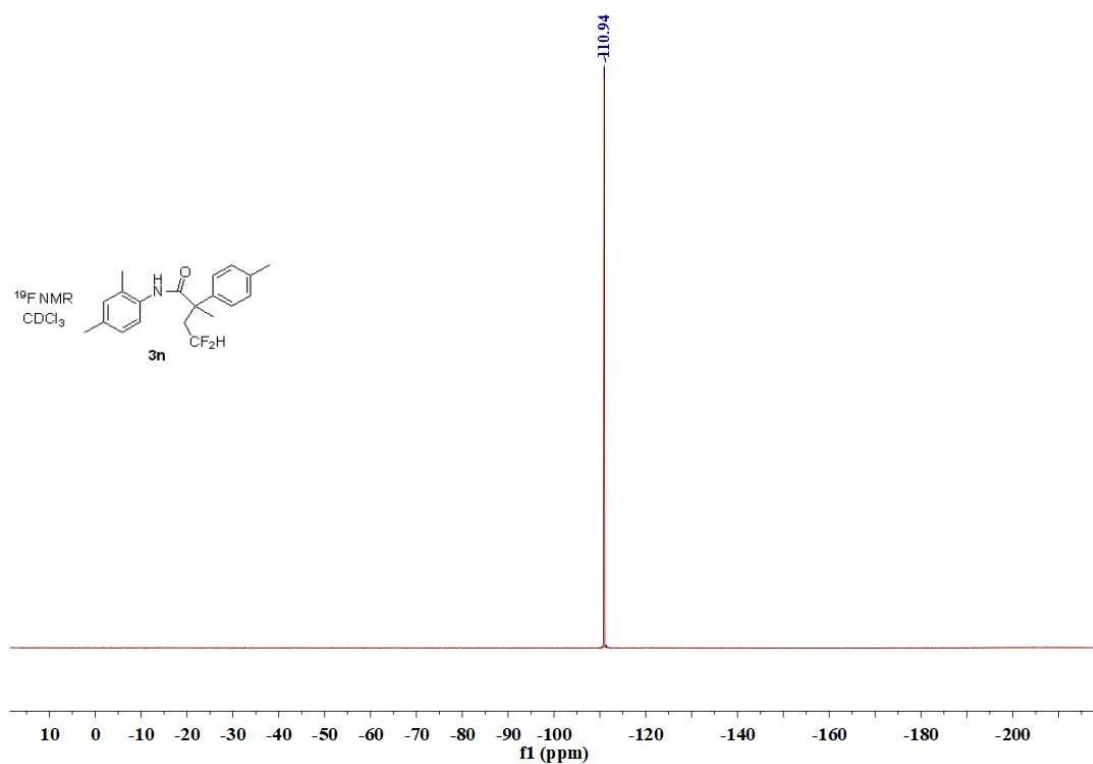

***N*-(3-bromo-4-methoxyphenyl)-4,4-difluoro-2-methyl-2-(*p*-tolyl)butanamide (3o).**

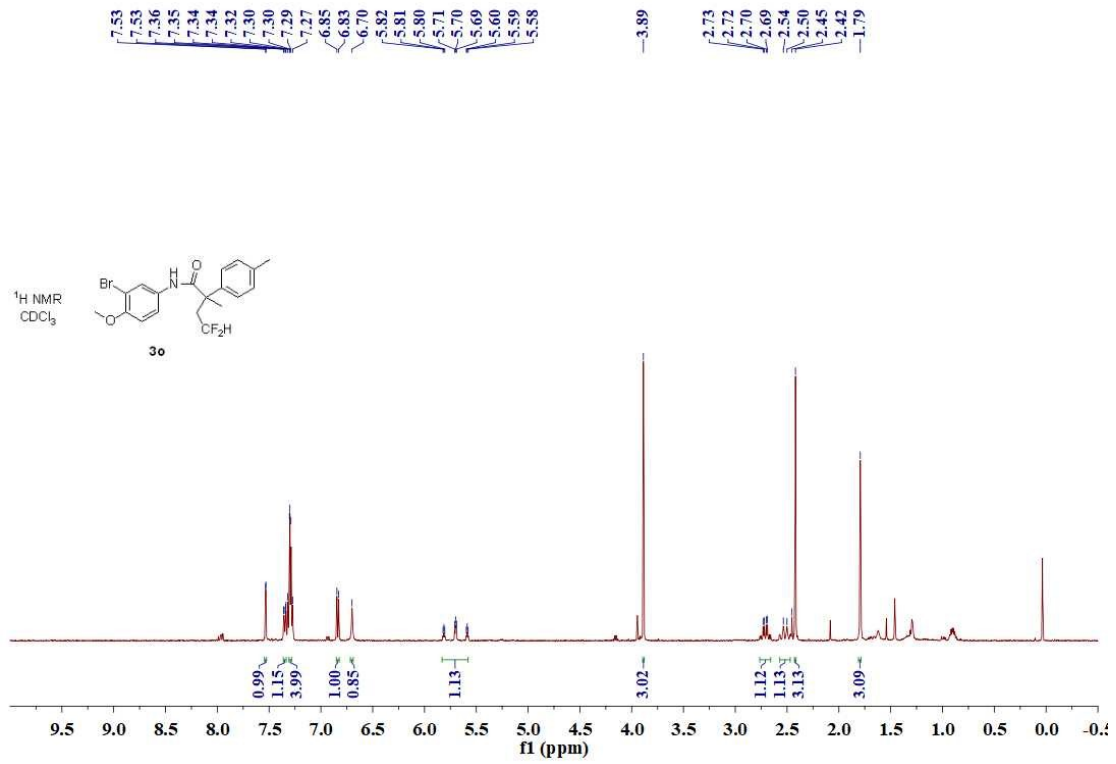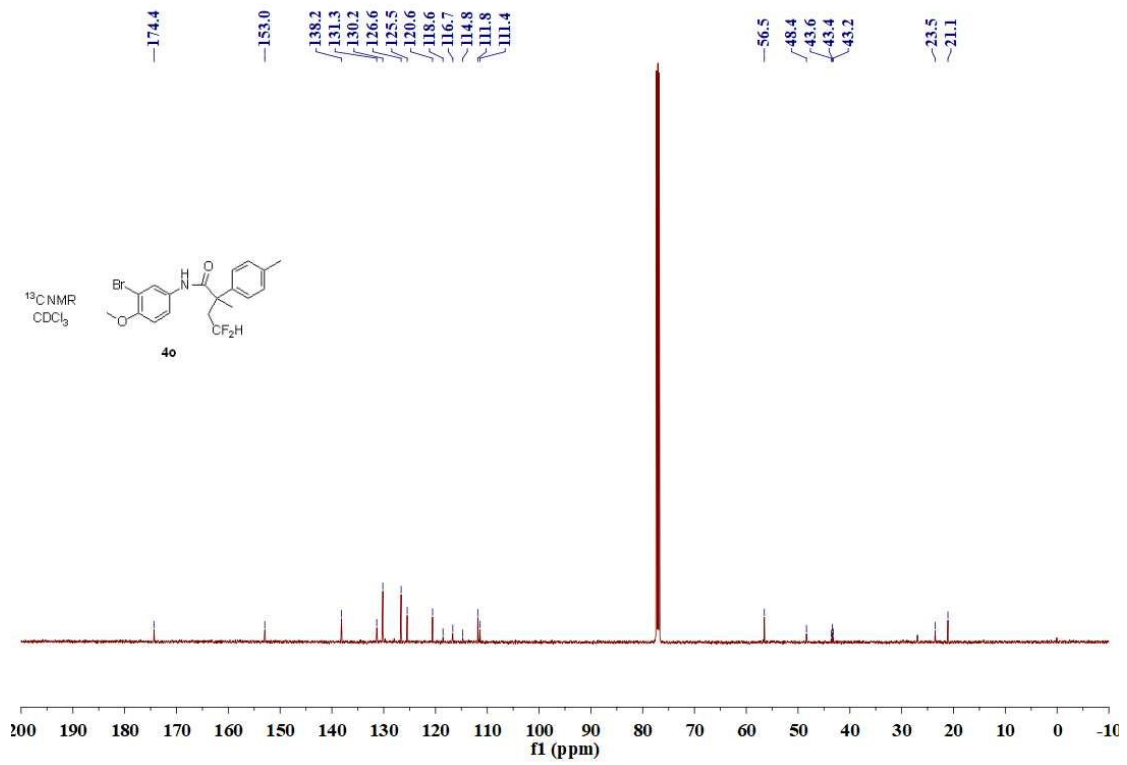

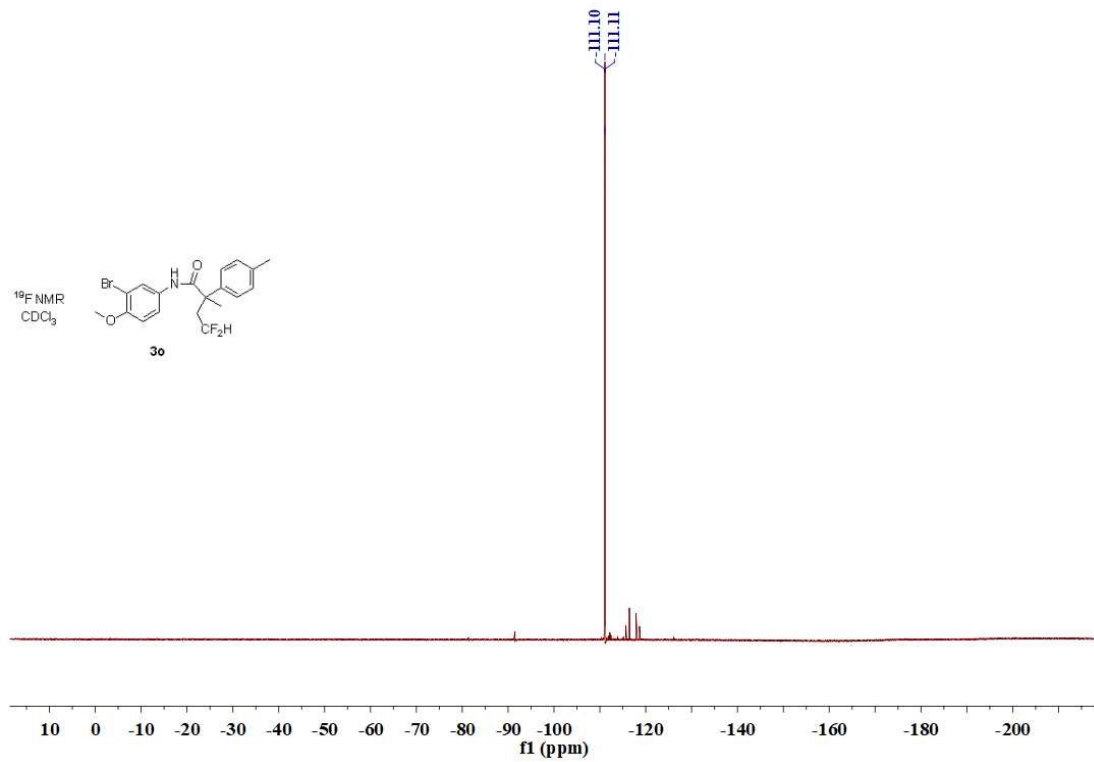

**4,4-difluoro-2-methyl-N,2-di-p-tolylbutanamide (3p).**

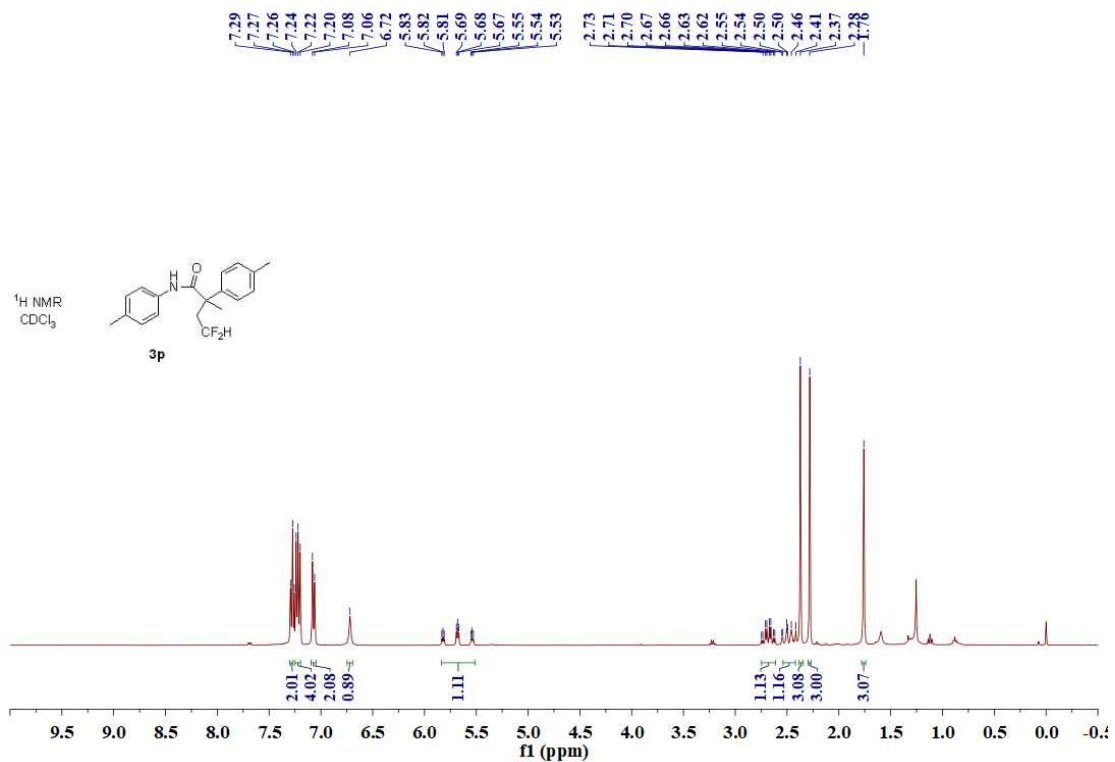

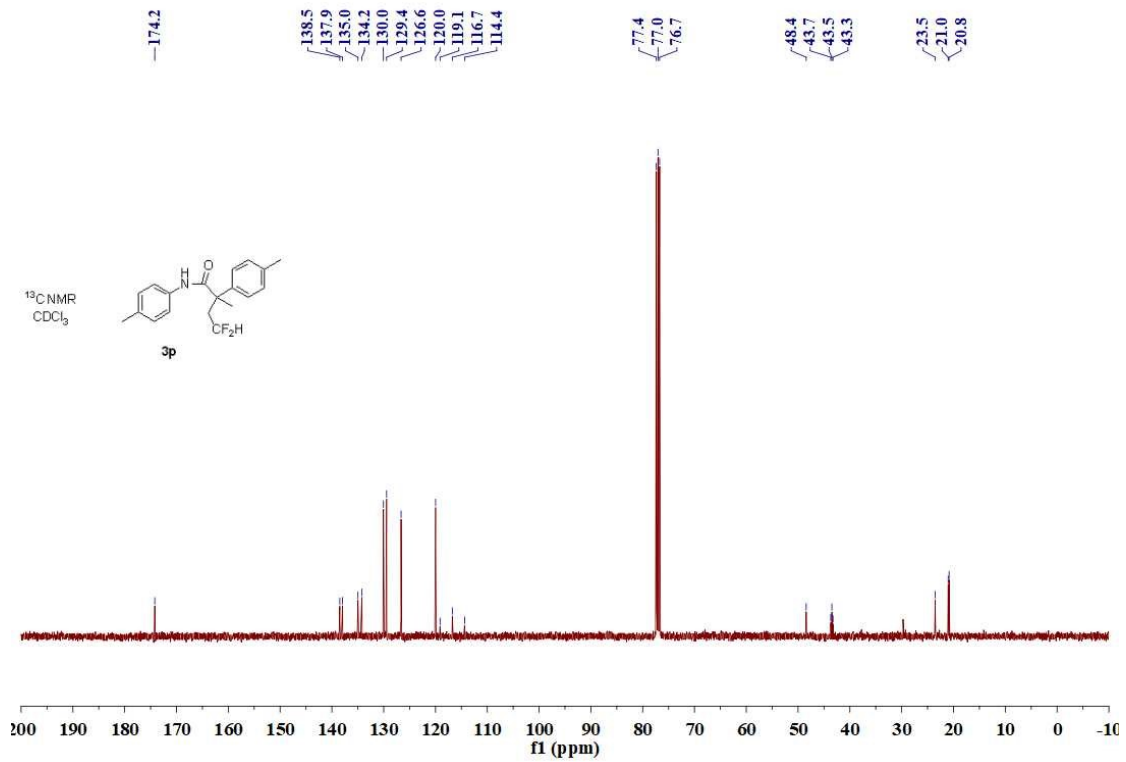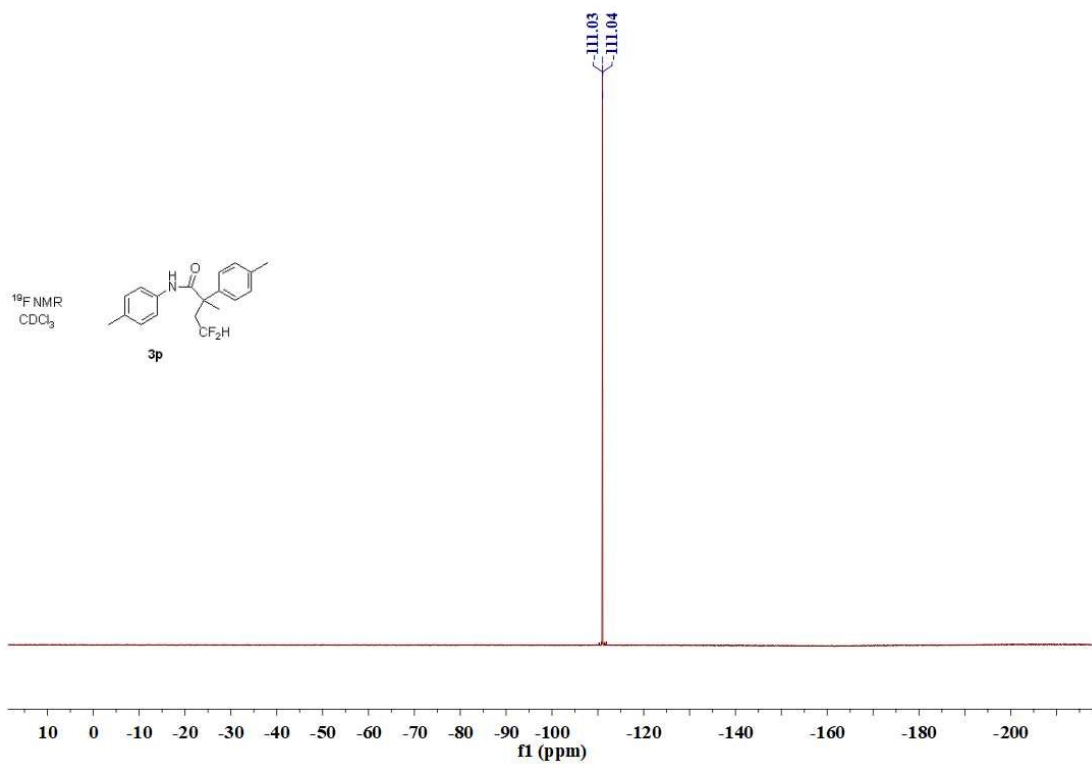

**4,4-difluoro-2-(4-methoxyphenyl)-2-methyl-N-phenylbutanamide (3q).**

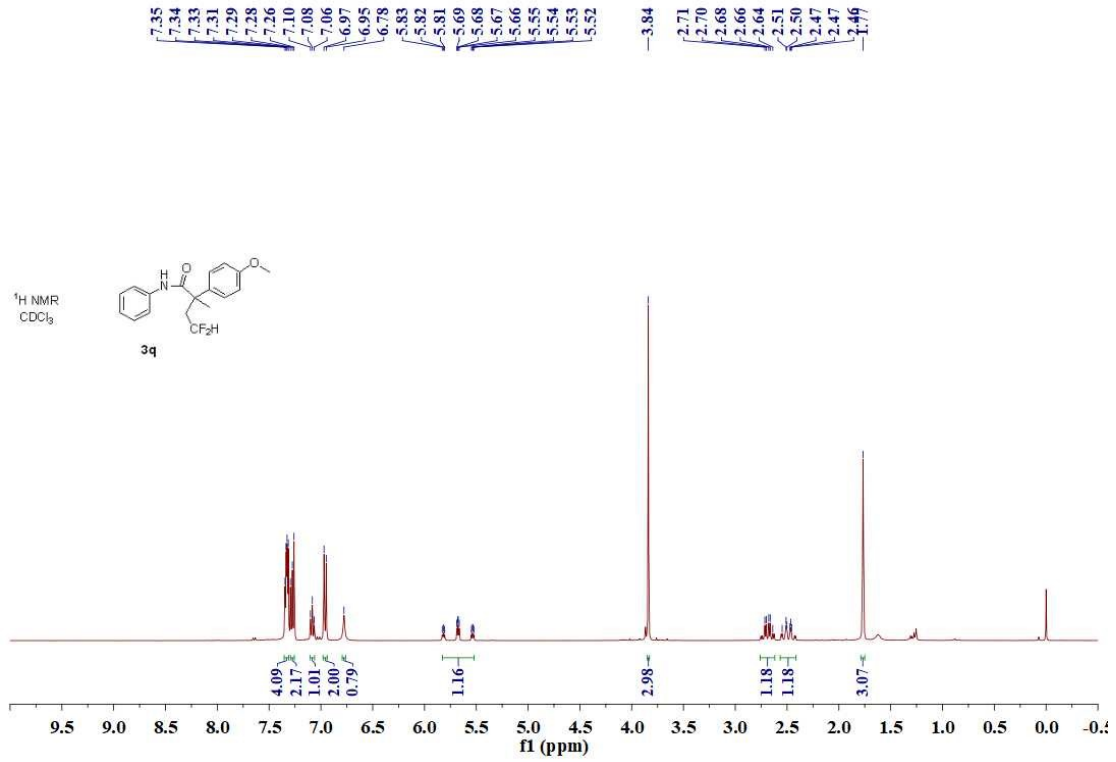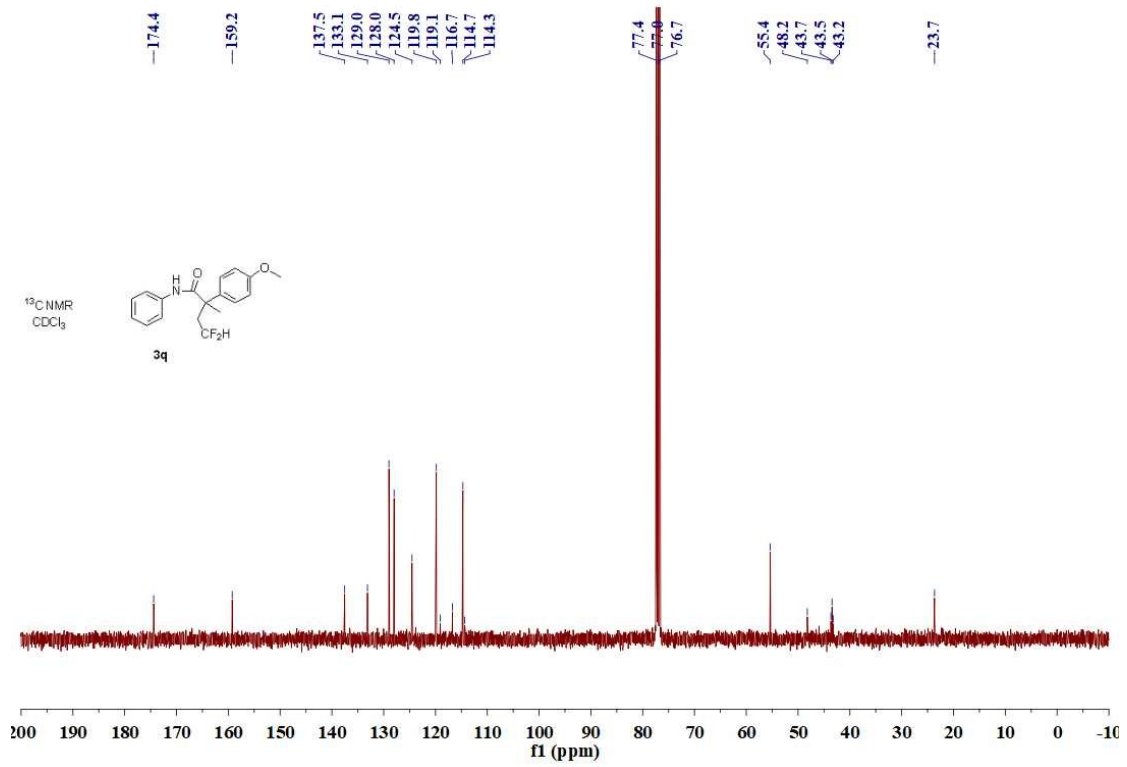

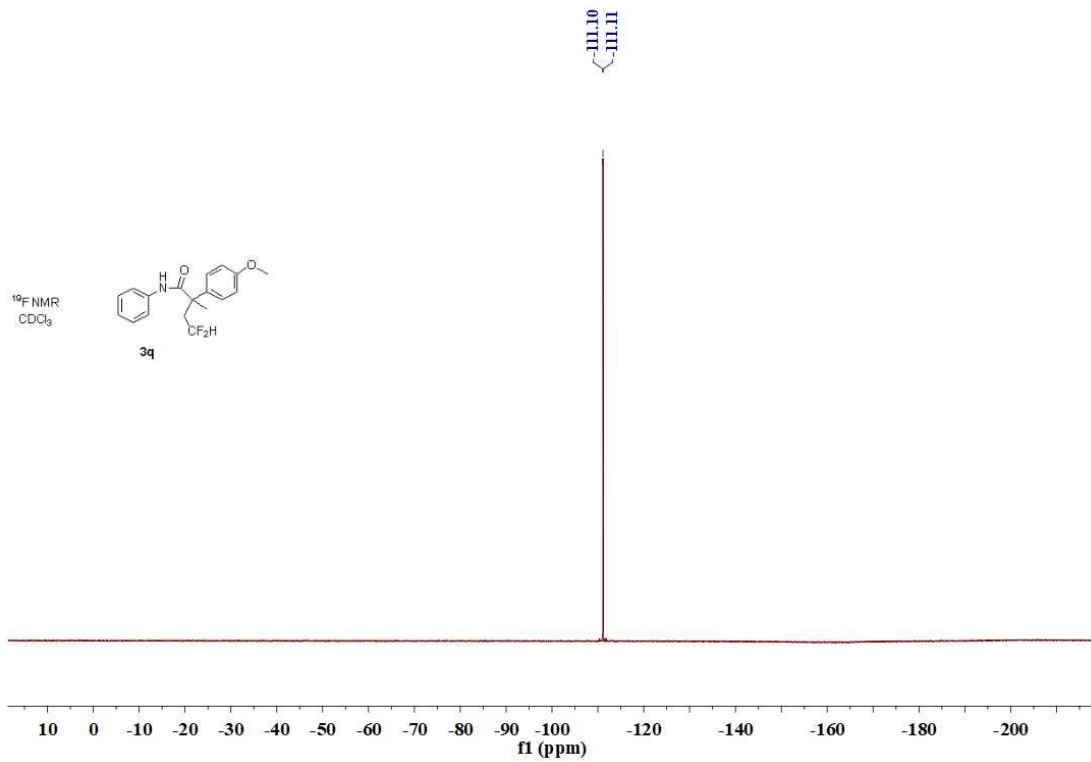

***N*-(4-(tert-butyl)phenyl)-4,4-difluoro-2-methyl-2-(p-tolyl)butanamide (3r).**

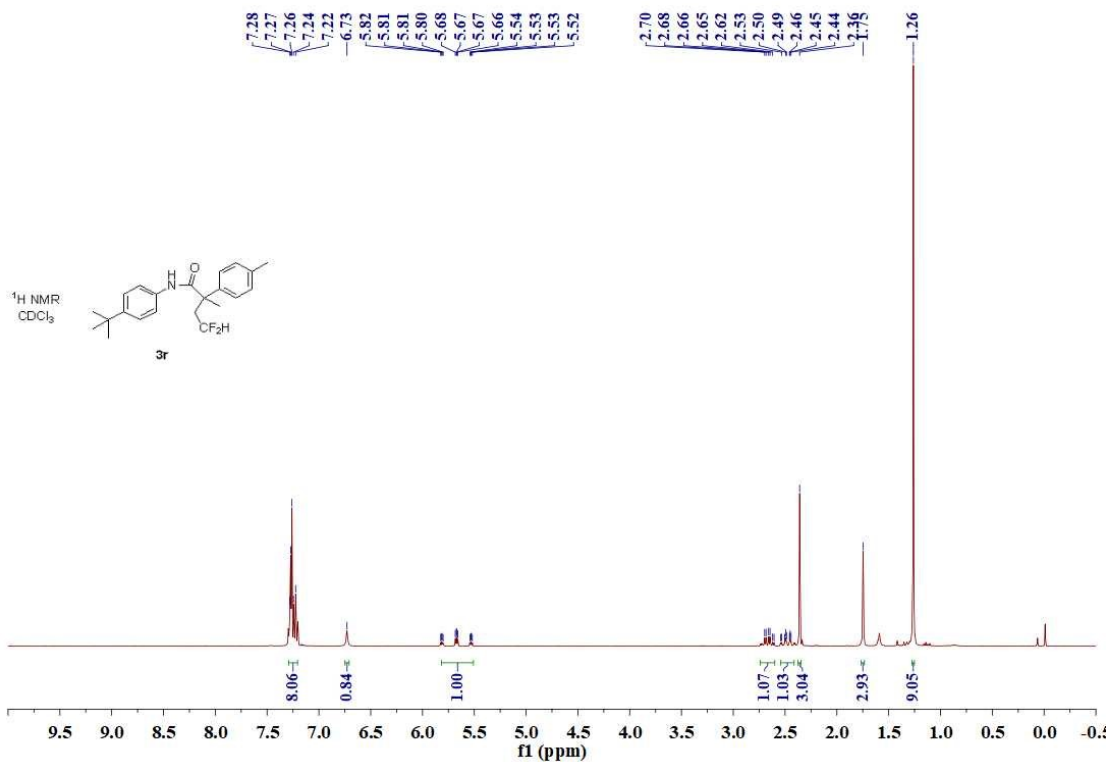

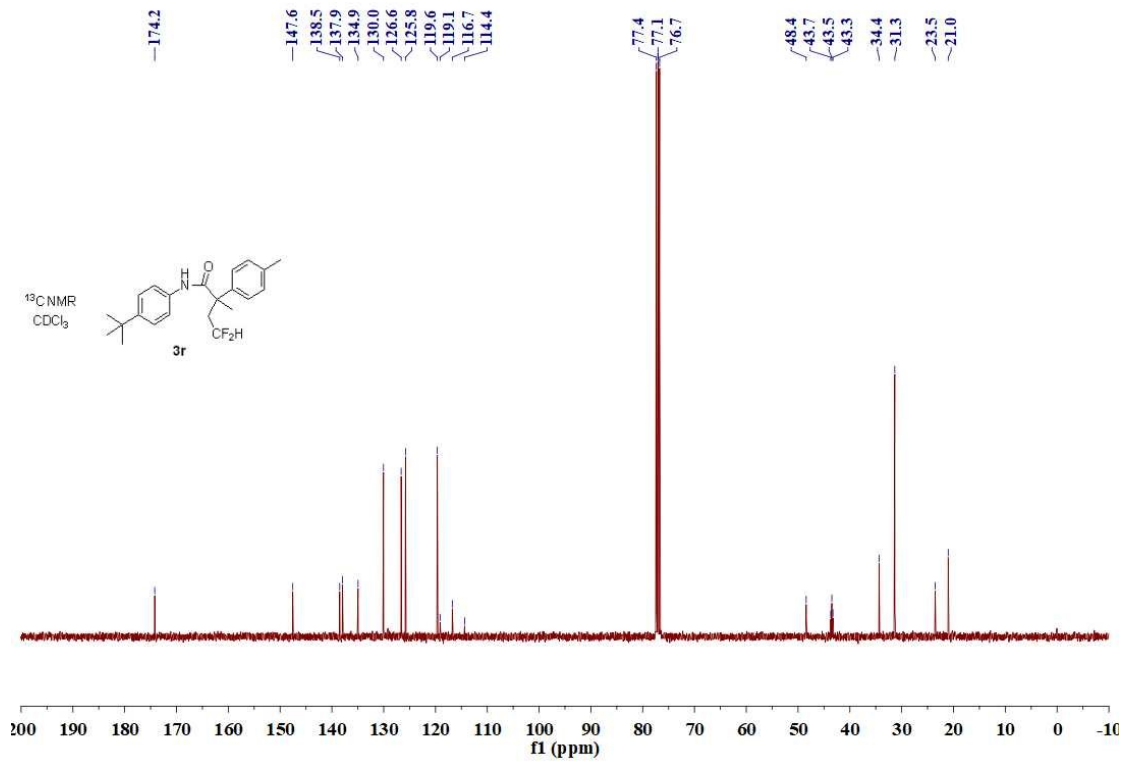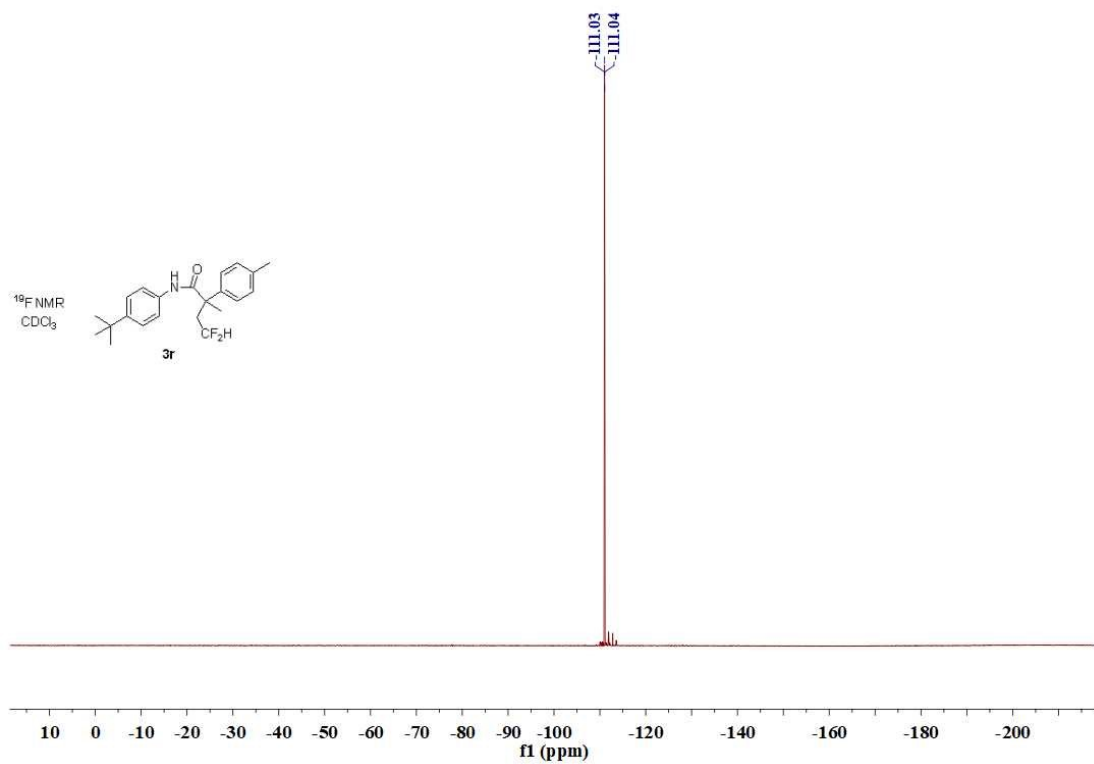

**4,4-difluoro-2-methyl-N-(m-tolyl)-2-(p-tolyl)butanamide (3s).**



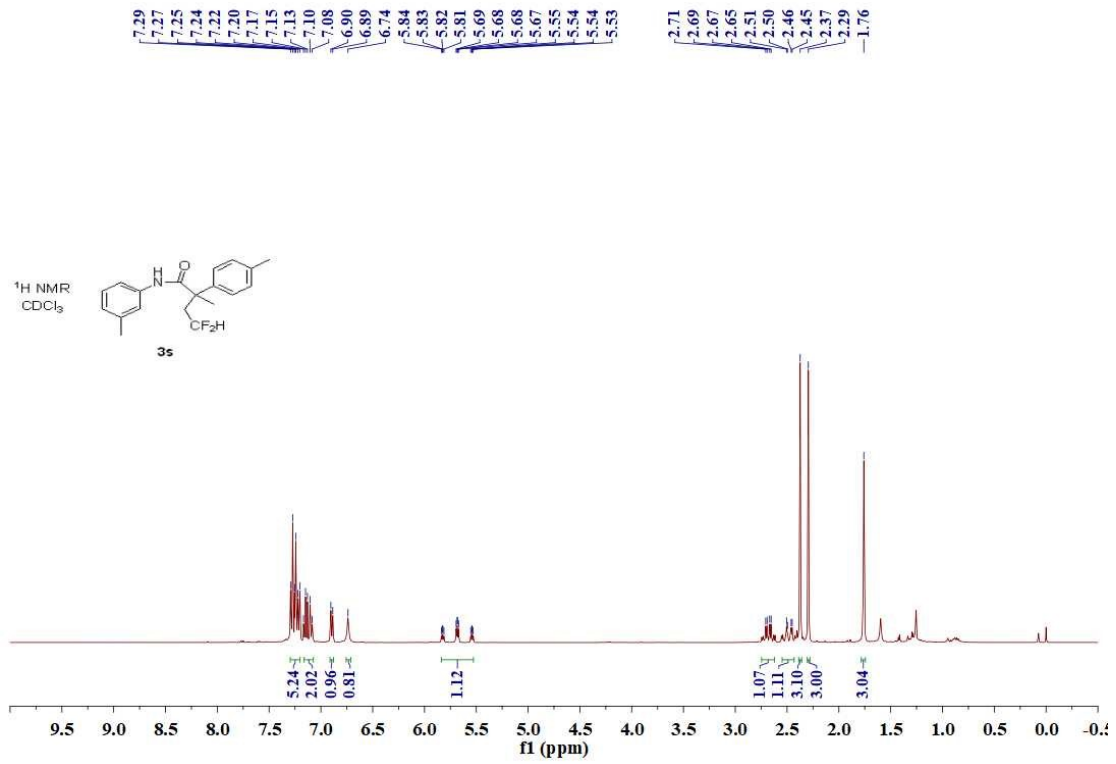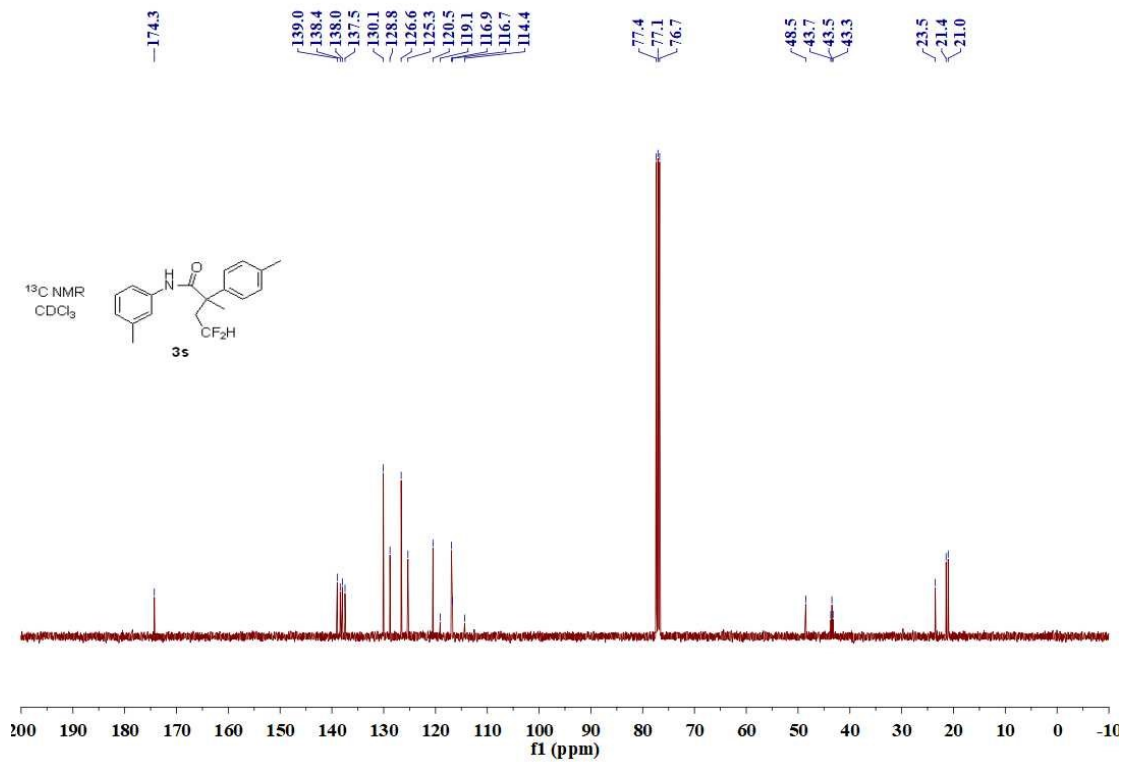

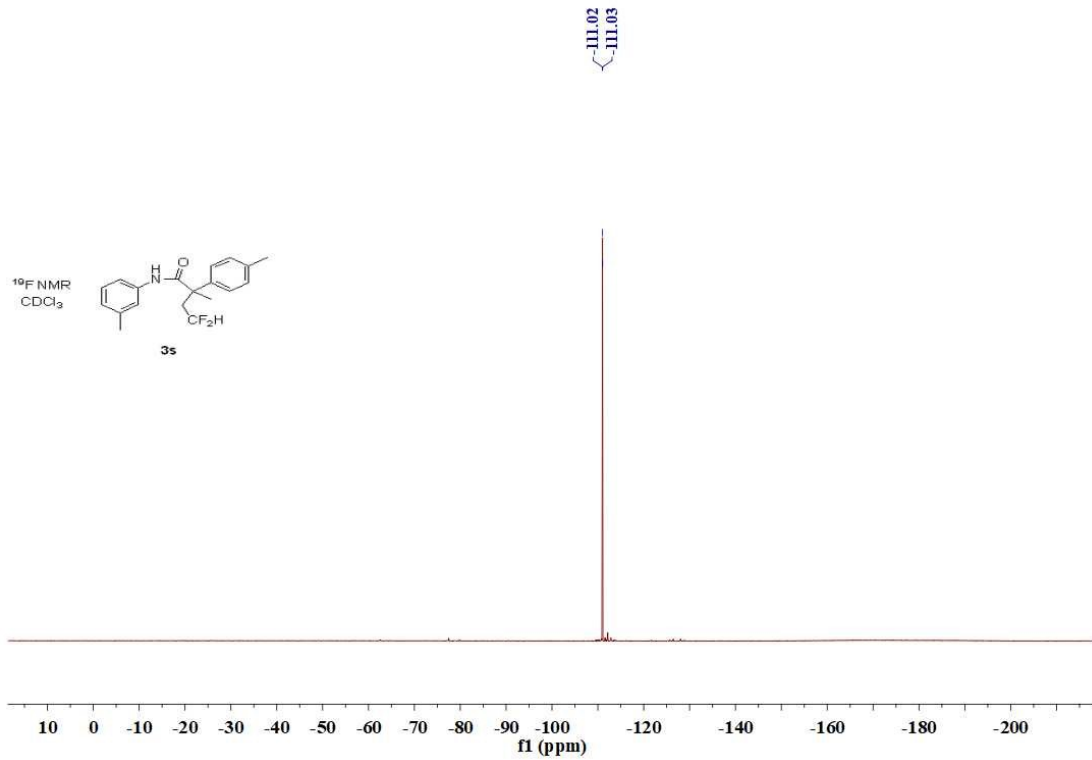

**4,4-difluoro-*N*-(4-methoxyphenyl)-2-methyl-2-(thiophen-2-yl)butanamide (3t).**

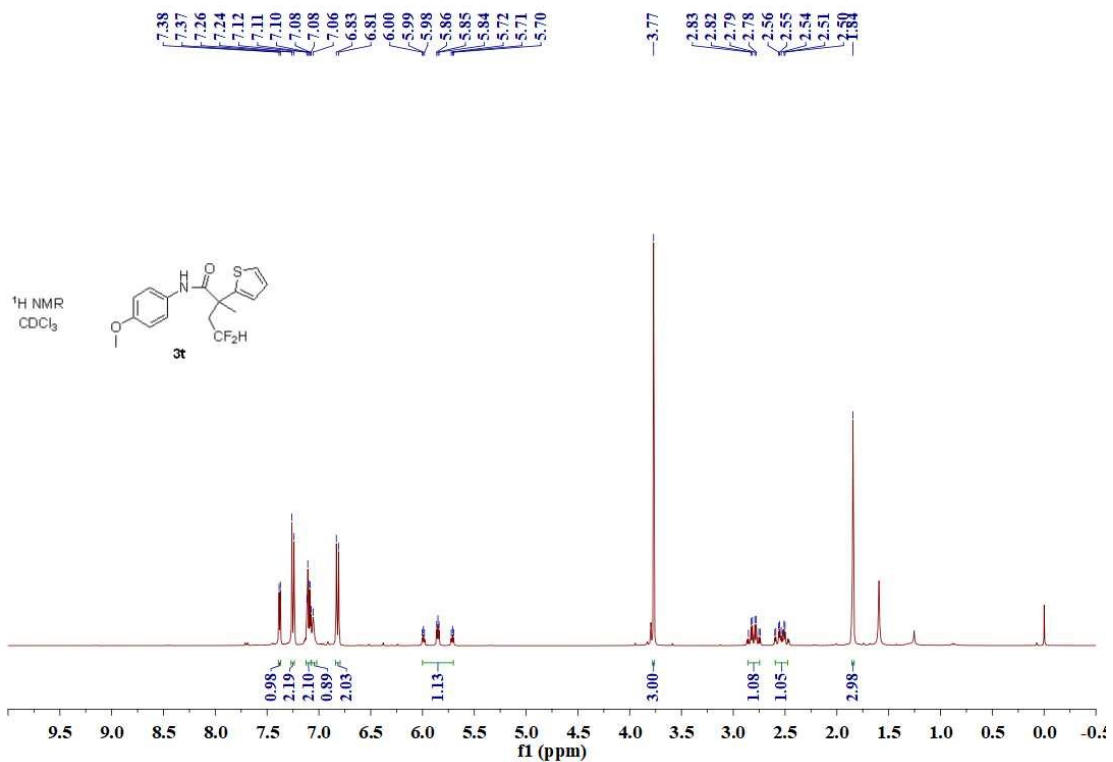

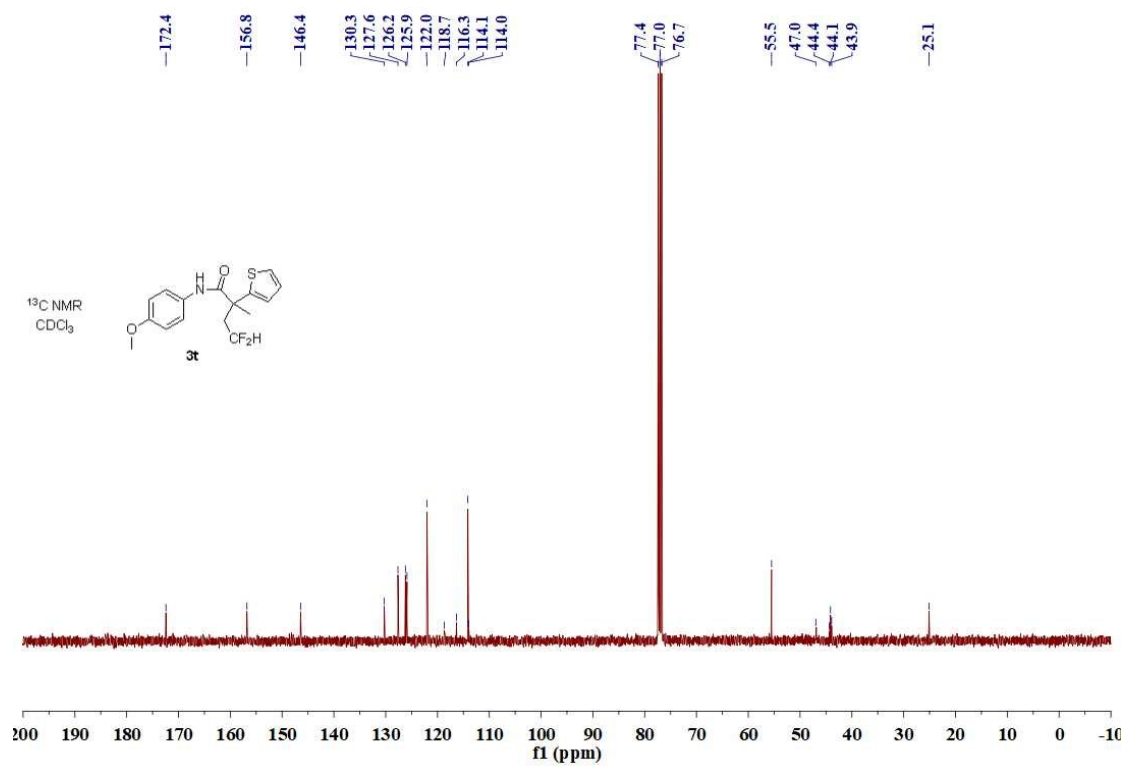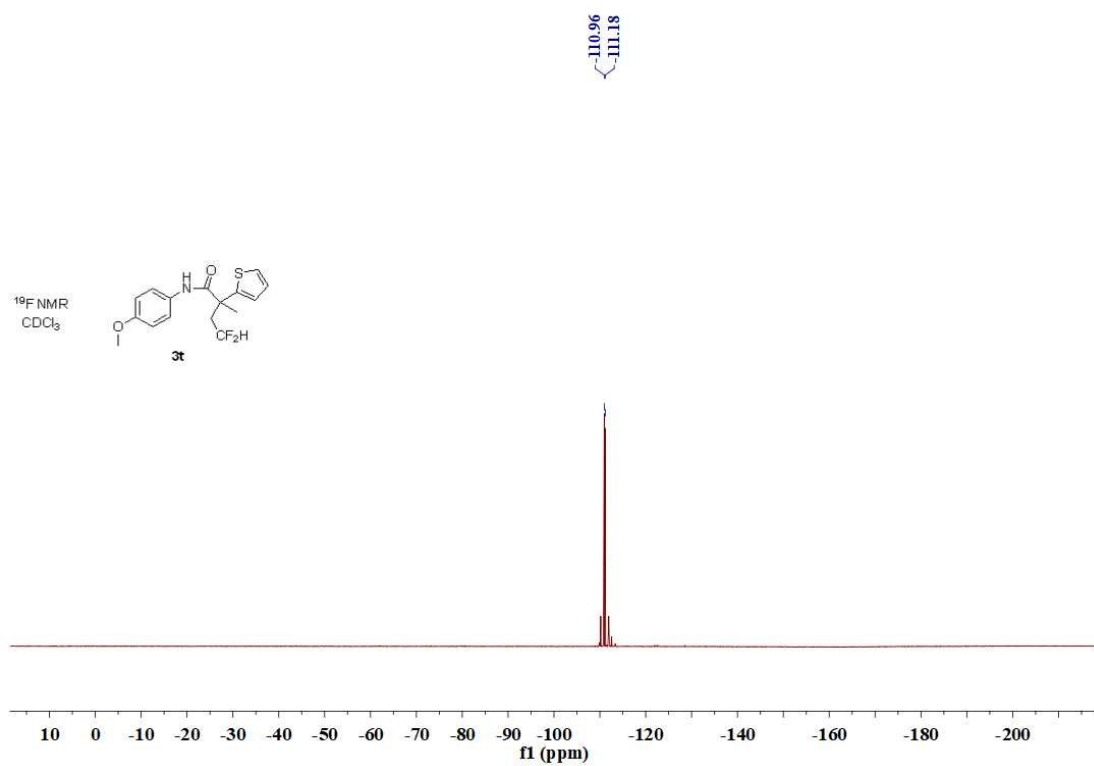

**4,4-difluoro-2-methyl-N,2-diphenylbutanamide (3u).**

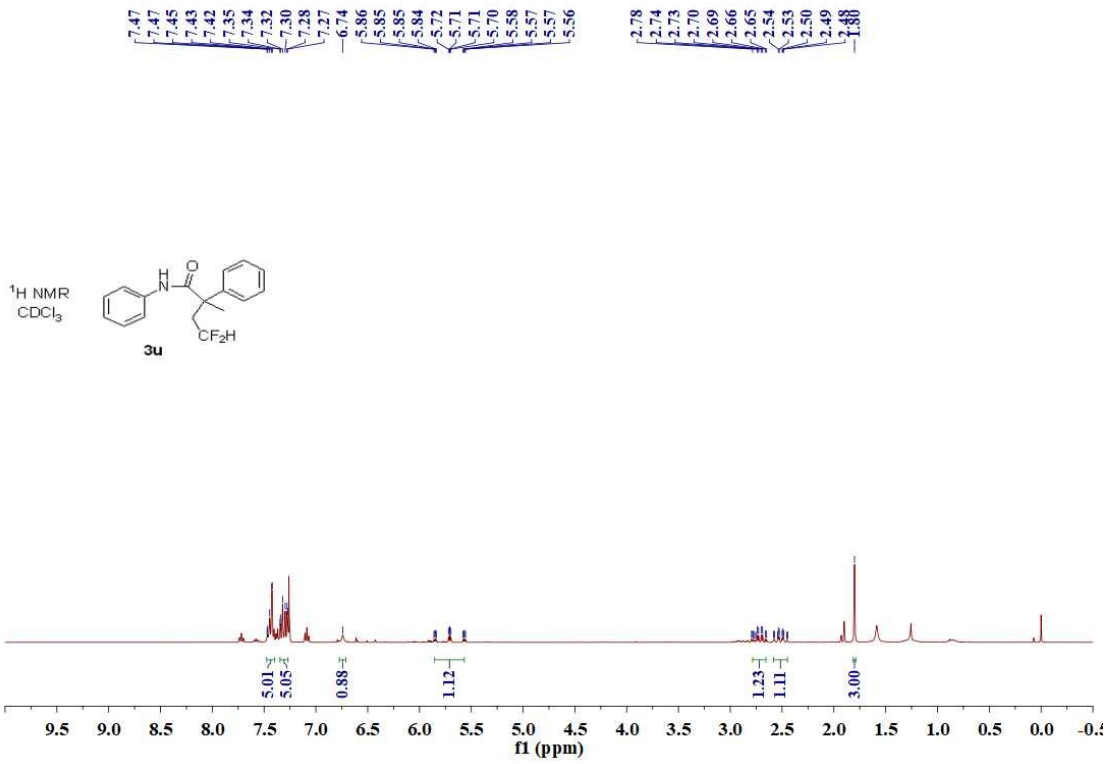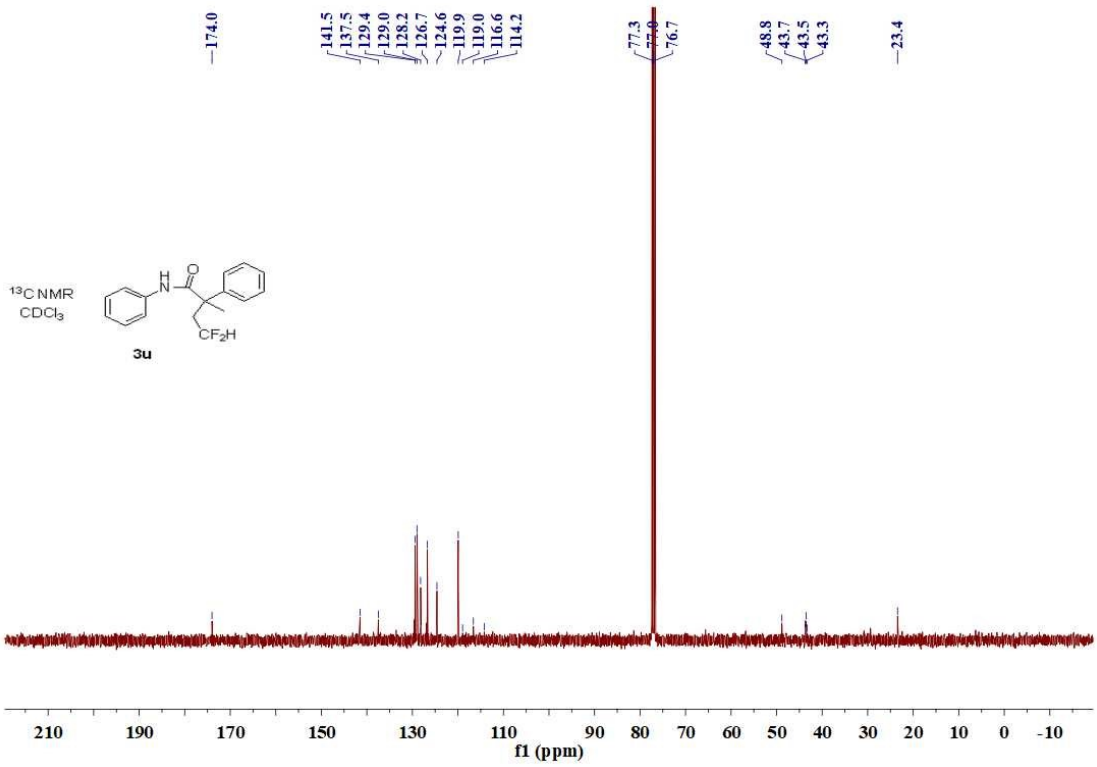

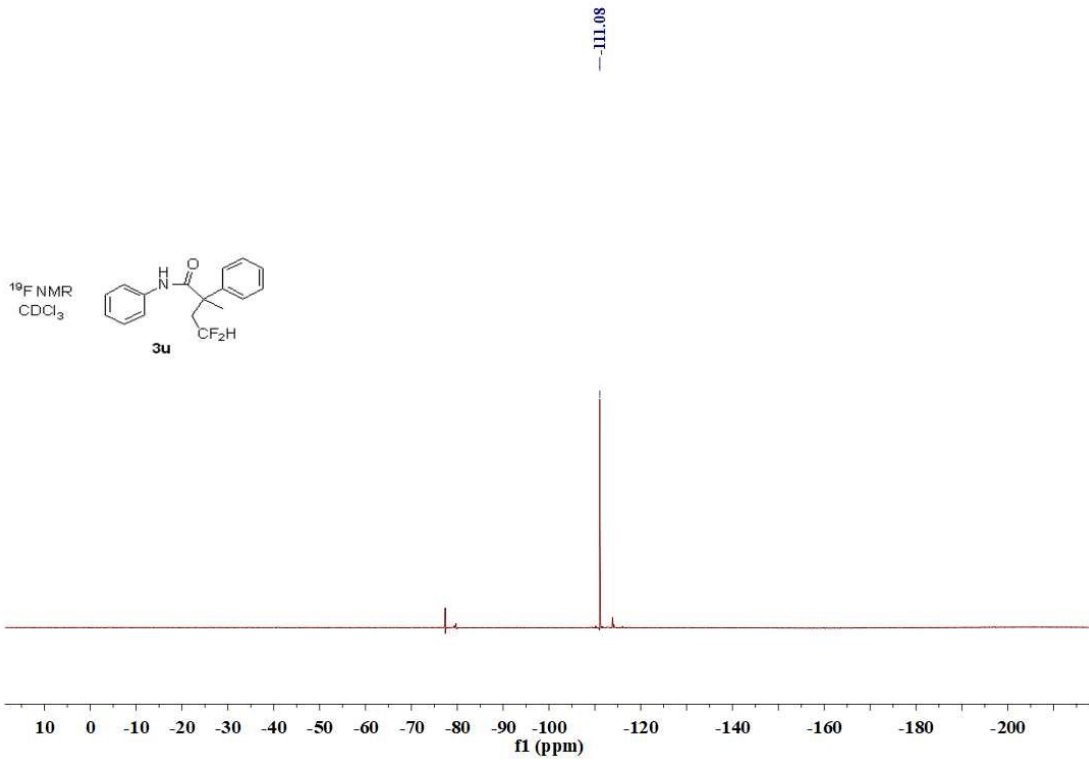

**4,4-difluoro-N-(4-methoxyphenyl)-2-methyl-2-phenylbutanamide (3v).**

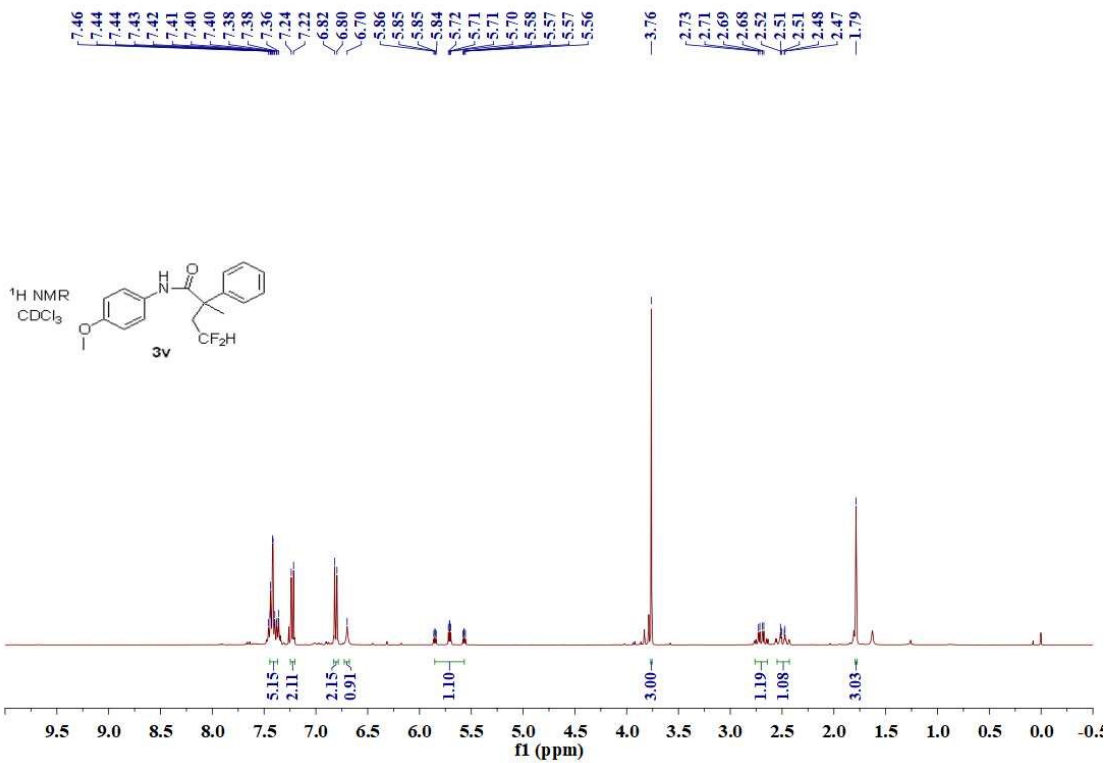

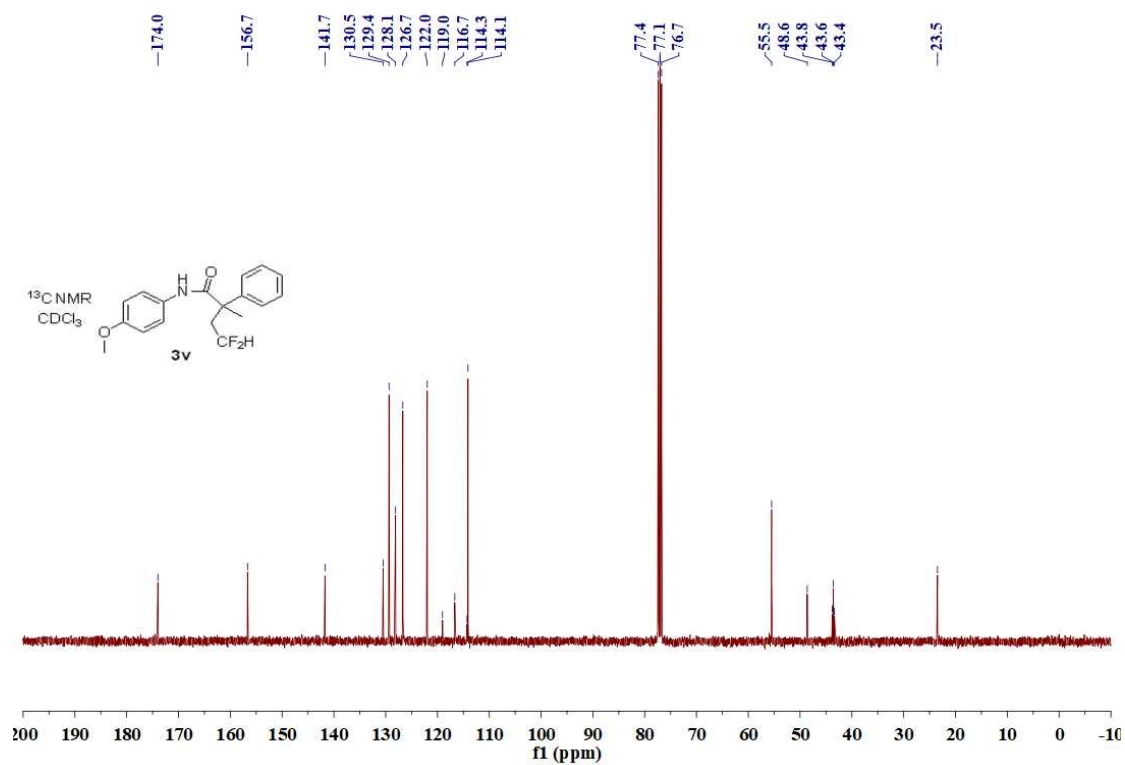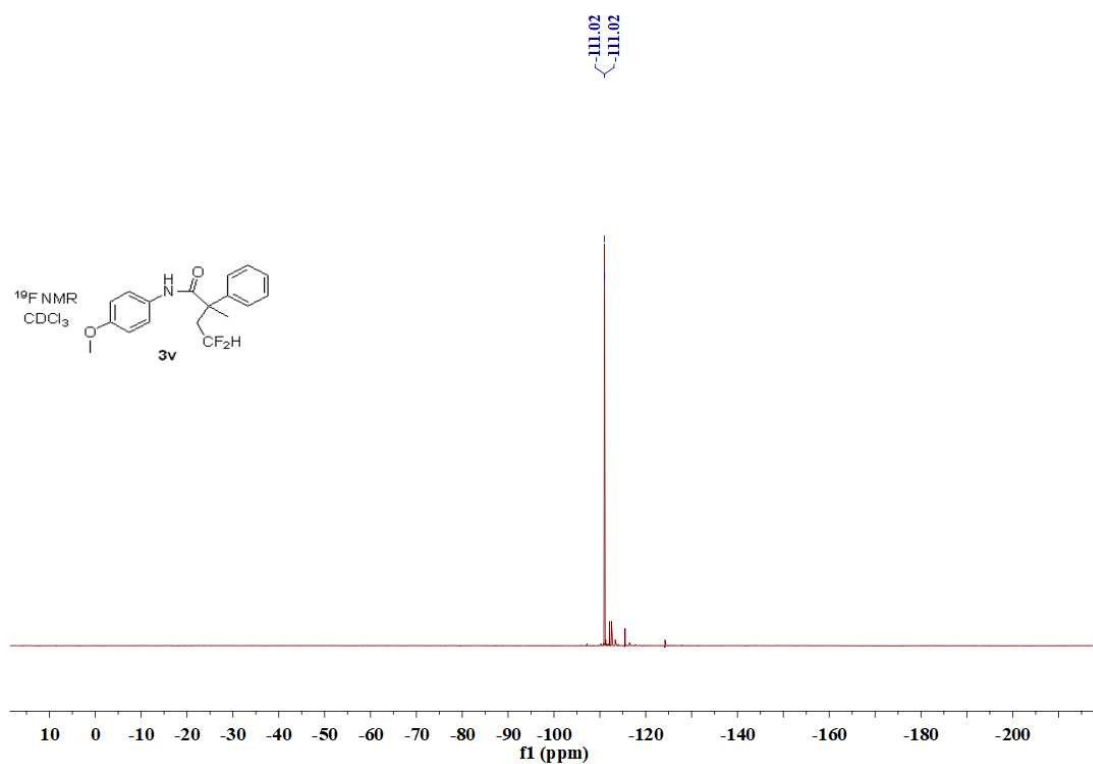

## 10. References

- 1 J. Wang, M. Liu, J. Zou, W. Sun, X. Liu, *Org. Lett.* 2022, **24**, 309-313
